# Supplementary material for: P,N,N-Pincer nickel-catalyzed cross-coupling of aryl fluorides and chlorides
Source: Royal Society of Chemistry journal article supplement (doi:10.1039/c4ob01041h), 2014-07-01

Electronic Supplementary Information

## *P,N,N*-pincer nickel-catalyzed cross-coupling of aryl fluorides and chlorides

Dan Wu, Zhong-Xia Wang

CAS Key Laboratory of Soft Matter Chemistry and Department of Chemistry, University of Science and Technology of China, Hefei, Anhui 230026, People's Republic of China

Fax: 86-551-63601592; E-mail: zxwang@ustc.edu.cn

### Synthesis and characterization of ligand precursors **HL2** and **HL3** and complexes **3a-3c**

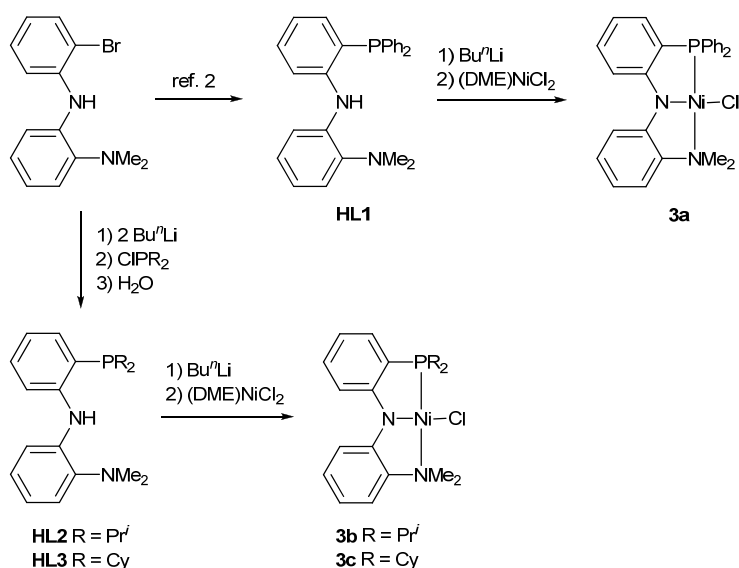

**Scheme S-1.** Synthesis of ligand precursors and complexes **3a-3c**

### Experimental details

The reactions were performed under nitrogen atmosphere using standard Schlenk and vacuum line techniques. Solvents were distilled under nitrogen over sodium (toluene, hexane) or sodium/benzophenone (THF,  $\text{Et}_2\text{O}$ ) and degassed prior to use.  $\text{CDCl}_3$  was purchased from Cambridge Isotope Laboratories and used as received.  $(\text{DME})\text{NiCl}_2$ ,<sup>1</sup> 2-(Bromophenyl)-2'-(dimethylaminophenyl)amine,<sup>2</sup> and 2-diphenylphosphinophenyl)-2'-(dimethylaminophenyl)amine (**HL1**)<sup>2</sup> were prepared according to reported methods. M Other chemicals were purchased from commercial vendors and used as received. NMR spectra were determined on a Bruker av300 or a Bruker Avance III 400 NMR spectrometer NMR spectrometer at room temperature using  $\text{CDCl}_3$  as solvent. The chemical shifts of the  $^1\text{H}$

NMR spectra were referenced to TMS; the chemical shifts of the  $^{13}\text{C}$  NMR spectra were referenced to internal solvent resonances and the chemical shifts of the  $^{31}\text{P}$  NMR spectra were referenced to external 85%  $\text{H}_3\text{PO}_4$ . Elemental analysis was performed using an Elementar Vario EL Cube instrument.

### **Preparation of (2-Diisopropylphosphinophenyl)-2'-(dimethylaminophenyl)amine (HL2)**

A 2.4 M solution of  $\text{Bu}^n\text{Li}$  in hexane ( $2.82\text{ cm}^3$ , 6.76 mmol) was added dropwise to a stirred solution of (2-bromophenyl-2'-dimethylaminophenyl)amine (0.98 g, 3.38 mmol) in  $\text{Et}_2\text{O}$  ( $20\text{ cm}^3$ ) at about  $-80\text{ }^\circ\text{C}$ . The mixture was allowed to warm to ambient temperature and stirred for 12 h. The resulting solution was re-cooled to  $-80\text{ }^\circ\text{C}$  and chlorodiisopropylphosphine ( $0.53\text{ cm}^3$ , 3.38 mmol) was added into the cooled solution. The mixture was warmed to room temperature and stirred for 12 h. Degassed water ( $10\text{ cm}^3$ ) and diethyl ether ( $10\text{ cm}^3$ ) were added. The organic layer was separated and the aqueous phase was extracted with diethyl ether ( $5\text{ cm}^3 \times 2$ ). The combined organic phase was dried over  $\text{MgSO}_4$  and evaporated to dryness under reduced pressure to afford a yellow oil. The yellow oil was dissolved in a mixed solvent of degassed ethanol ( $1\text{ cm}^3$ ) and hexane ( $8\text{ cm}^3$ ) and cooled to  $-80\text{ }^\circ\text{C}$  to give an off-white solid of **HL2** (0.507 g, 46%).  $^1\text{H}$  NMR ( $\text{CDCl}_3$ ):  $\delta$  0.96 (dd,  $J = 6.8, 11.6\text{ Hz}$ , 6H,  $\text{CHMe}_2$ ), 1.12 (dd,  $J = 6.8, 15.2\text{ Hz}$ , 6H,  $\text{CHMe}_2$ ), 2.08-2.18 (m, 2H,  $\text{CHMe}_2$ ), 2.70 (s, 6H,  $\text{NMe}_2$ ), 6.86 (t,  $J = 7.4\text{ Hz}$ , 2H,  $\text{C}_6\text{H}_4$ ), 6.95 (t,  $J = 7.6\text{ Hz}$ , 1H,  $\text{C}_6\text{H}_4$ ), 7.08 (d,  $J = 8\text{ Hz}$ , 1H,  $\text{C}_6\text{H}_4$ ), 7.19-7.25 (m, 1H,  $\text{C}_6\text{H}_4$ ), 7.30-7.41 (m, 2H,  $\text{C}_6\text{H}_4$ ), 7.59 (d,  $J = 8.4\text{ Hz}$ , 1H,  $\text{C}_6\text{H}_4$ ).  $^{13}\text{C}$  NMR ( $\text{CDCl}_3$ ):  $\delta$  19.03 (d,  $J = 8.9\text{ Hz}$ ), 20.19 (d,  $J = 18.3\text{ Hz}$ ), 23.11 (d,  $J = 10.7\text{ Hz}$ ), 44.04, 115.92 (d,  $J = 2.4\text{ Hz}$ ), 116.00, 119.46 (d,  $J = 6.7\text{ Hz}$ ), 120.50, 121.80, 121.95, 123.40, 129.55, 133.67, 137.46, 143.99, 148.63 (d,  $J = 18.4\text{ Hz}$ ).  $^{31}\text{P}$  NMR ( $\text{CDCl}_3$ ):  $\delta$  -13.61.

### **Preparation of (2-Dicyclohexylphosphinophenyl)-2'-(dimethylaminophenyl)amine (HL3)**

A 2.4 M solution of  $\text{Bu}^n\text{Li}$  in hexane ( $3.46\text{ cm}^3$ , 8.30 mmol) was added dropwise to a stirred solution of (2-bromophenyl-2'-dimethylaminophenyl)amine (1.21 g, 4.15 mmol) in  $\text{Et}_2\text{O}$  ( $20\text{ cm}^3$ ) at about  $-80\text{ }^\circ\text{C}$ . The mixture was allowed to warm to ambient temperature and stirred for 12 h. After re-cooling this solution to  $-80\text{ }^\circ\text{C}$  chlorodicyclohexylphosphine ( $0.94\text{ cm}^3$ , 4.15 mmol) was added. The resulting mixture was warmed to room temperature and stirred for 12 h. Degassed water ( $10\text{ cm}^3$ ) and diethyl ether ( $10\text{ cm}^3$ ) were added. The organic phase was separated and the aqueous phase was extracted with diethyl ether ( $5\text{ cm}^3 \times 2$ ). The combined organic phase was dried over  $\text{MgSO}_4$  and evaporated to dryness under reduced pressure to

afford a yellow oil. The yellow oil was dissolved in a mixed solvent of degassed ethanol (1 cm<sup>3</sup>) and hexane (8 cm<sup>3</sup>). The solution was cooled to -80 °C to give an off-white solid of **HL3** (0.857 g, 51%). <sup>1</sup>H NMR (CDCl<sub>3</sub>): δ 0.99-1.38 (m, 10H, Cy), 1.55-1.80 (m, 8H, Cy), 1.82-2.03 (m, 4H, Cy), 2.69 (s, 6H, NMe<sub>2</sub>), 6.81-6.99 (m, 3H, C<sub>6</sub>H<sub>4</sub>), 7.07 (d, *J* = 8.8 Hz, 1H, C<sub>6</sub>H<sub>4</sub>), 7.17-7.43 (m, 3H, C<sub>6</sub>H<sub>4</sub>), 7.55 (d, *J* = 9.6 Hz, 1H, C<sub>6</sub>H<sub>4</sub>). <sup>13</sup>C NMR (CDCl<sub>3</sub>): δ 26.52, 27.16 (d, *J* = 7.9 Hz), 27.37, 27.50, 28.92 (d, *J* = 7.5 Hz), 30.46 (d, *J* = 16.7 Hz), 33.02 (d, *J* = 10.8 Hz), 44.00, 115.73, 116.25, 119.32, 119.35, 120.54, 121.47 (d, *J* = 16 Hz), 123.34, 129.47, 134.09, 137.42, 144.05, 148.76 (d, *J* = 18 Hz). <sup>31</sup>P NMR (CDCl<sub>3</sub>): δ -25.09.

### Preparation of [(L1)NiCl] (3a)

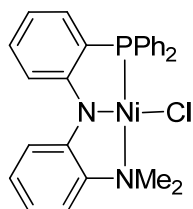

A solution of compound **HL1** (0.86 g, 2.16 mmol) in THF (25 cm<sup>3</sup>) was cooled to about -80 °C. To the solution was added dropwise a 2.4 M solution of Bu<sup>n</sup>Li in hexane (0.9 cm<sup>3</sup>, 2.16 mmol) with stirring. The mixture was warmed to room temperature and stirred for 4 h. The resulting solution was added dropwise into a stirred suspension of (DME)NiCl<sub>2</sub> (0.48 g, 2.16 mmol) in THF (15 cm<sup>3</sup>) at about -80 °C. The mixture was warmed to room temperature and stirred overnight. Volatiles were removed in vacuo, and the residue was dissolved in toluene. The resulting solution was filtered and concentrated to afford green powder of **3a** (0.73 g, 69%), mp 236-237 °C. Anal. Calcd for C<sub>26</sub>H<sub>24</sub>N<sub>2</sub>PNiCl·0.1C<sub>7</sub>H<sub>8</sub>: C, 64.29; H, 5.01; N, 5.62. Found: C, 64.54; H, 4.92; N, 5.70. <sup>1</sup>H NMR (CDCl<sub>3</sub>): δ 3.01 (d, *J* = 2 Hz, 6H, NMe<sub>2</sub>), 6.47 (t, *J* = 7 Hz, 1H, Ar), 6.54-6.58 (m, 1H, Ar), 6.91-6.98 (m, 2H, Ar), 7.10-7.14 (m, 1H, Ar), 7.16 (dd, *J* = 1.2, 8 Hz, 1H, Ar), 7.40-7.47 (m, 5H, Ar), 7.48-7.54 (m, 3H, Ar), 7.84-7.92 (m, 4H, Ar). <sup>13</sup>C NMR (CDCl<sub>3</sub>): δ 49.03 (d, *J* = 2.3 Hz), 115.02, 115.52 (d, *J* = 11.8 Hz), 116.96, 117.09 (d, *J* = 7.7 Hz), 120.84, 122.14, 122.68, 127.38, 128.86 (d, *J* = 11 Hz), 129.15, 129.67, 131.06 (d, *J* = 2.9 Hz), 132.43 (d, *J* = 2 Hz), 133.50 (d, *J* = 10.4 Hz), 133.81, 146.52 (d, *J* = 2.8 Hz), 149.09 (d, *J* = 2 Hz), 159.89, 160.11. <sup>31</sup>P NMR (CDCl<sub>3</sub>): δ 26.67.

### Preparation of [(L2)NiCl] (3b)

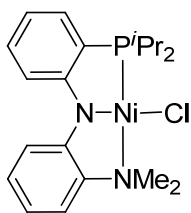

A solution of compound **HL2** (0.51 g, 1.54 mmol) in THF (25 cm<sup>3</sup>) was cooled to about -80 °C. To the solution was added dropwise a 2.4 M solution Bu<sup>n</sup>Li in hexane (0.64 cm<sup>3</sup>, 1.54 mmol) with stirring. The mixture was warmed to room temperature and stirred for 4 h. The resulting solution was added dropwise into a stirred suspension of (DME)NiCl<sub>2</sub> (0.34 g, 1.54 mmol) in THF (15 cm<sup>3</sup>) at about -80 °C. The resulting mixture was warmed to room temperature and stirred overnight. Volatiles were removed in vacuo, and the residue was dissolved in Et<sub>2</sub>O and then filtered. Hexane was added into the filtrate to form green crystals of **3b** (0.42 g, 65%), mp 151-152 °C. Anal. Calcd for C<sub>20</sub>H<sub>28</sub>N<sub>2</sub>PNiCl·0.2C<sub>6</sub>H<sub>14</sub>: C, 58.03; H, 7.07; N, 6.38. Found: C, 58.10; H, 6.68, N, 6.46. <sup>1</sup>H NMR (CDCl<sub>3</sub>): δ 1.32 (dd, *J* = 6, 14.8 Hz, 6H, *i*-Pr), 1.50 (dd, *J* = 6, 16.4 Hz, 6H, *i*-Pr), 2.14-2.32 (m, *i*-Pr), 2.88 (s, 6H, NMe), 6.79-6.89 (m, 1H, Ar), 6.35-6.52 (m, 2H, Ar), 6.98-7.13 (m, 3H, Ar), 7.31-7.47 (m, 2H, Ar). <sup>13</sup>C NMR (CDCl<sub>3</sub>): δ 17.78, 18.70, 24.62 (d, *J* = 24.3 Hz), 48.50, 114.80, 115.30 (d, *J* = 10.8 Hz), 116.23 (d, *J* = 6.8 Hz), 116.45, 119.59, 120.02, 120.72, 127.18, 131.54, 131.87, 146.22, 149.42, 160.94, 161.12. <sup>31</sup>P NMR (CDCl<sub>3</sub>): δ 52.89.

### Preparation of [(L3)NiCl] (**3c**)

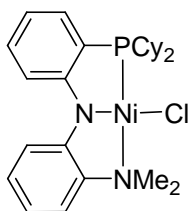

A solution of compound **HL3** (0.86 g, 2.10 mmol) in THF (25 cm<sup>3</sup>) was cooled to about -80 °C. To the solution was added dropwise a 2.4 M solution of Bu<sup>n</sup>Li in hexane (0.86 cm<sup>3</sup>, 2.10 mmol) with stirring. The mixture was warmed to room temperature and stirred for 4 h. The resulting solution was added dropwise into a stirred suspension of (DME)NiCl<sub>2</sub> (0.46 g, 2.10 mmol) in THF (15 cm<sup>3</sup>) at about -80 °C. The mixture was warmed to room temperature and stirred overnight. Volatiles were removed in vacuo. The residue was dissolved in Et<sub>2</sub>O and then filtered. Hexane was added into the filtrate to form green crystals of **3c** (0.90 g, 86%), mp 180-181 °C. Anal. Calcd for C<sub>26</sub>H<sub>36</sub>N<sub>2</sub>PNiCl: C, 62.24; H, 7.23; N, 5.58. Found: C, 61.75; H, 7.23, N, 5.58. <sup>1</sup>H NMR (CDCl<sub>3</sub>): δ 1.14-1.47 (m, 6H, C<sub>6</sub>H<sub>11</sub>), 1.55-2.16 (m, 14H, C<sub>6</sub>H<sub>11</sub>),

2.62 (b, 2H, C<sub>6</sub>H<sub>11</sub>), 2.95 (s, 6H, NMe), 6.42-6.61 (m, 2H, Ar), 6.83-6.97 (m, 1H, Ar), 7.03-7.21 (m, 3H, Ar), 7.35-7.54 (m, 2H, Ar). <sup>13</sup>C NMR (CDCl<sub>3</sub>): δ 26.16, 26.99, 27.10, 27.25, 27.99, 28.53, 33.85, 34.11, 48.53, 114.77, 115.19 (d, *J* = 10.9 Hz), 116.16 (d, *J* = 6.8 Hz), 116.37, 120.02, 120.46, 120.69, 127.14, 131.65, 131.79, 146.27, 149.45, 161.00, 161.18. <sup>31</sup>P NMR (CDCl<sub>3</sub>): δ 45.58.

### Crystal structure determination

Single crystal of complex **3c** was mounted in Lindemann capillaries under nitrogen. Diffraction data were collected at 290(2) K on an Oxford Diffraction Gemini S Ultra diffractometer with mirror-monochromated Cu *K*<sub>α</sub> radiation ( $\lambda = 1.54184$  Å). The structures were solved by direct methods using SHELXS-97<sup>3</sup> and refined against *F*<sup>2</sup> by full-matrix least-squares using SHELXL-97.<sup>4</sup> Hydrogen atoms were placed in calculated positions. Crystal data and experimental details of the structure determinations are listed in Table 1. CCDC 996222 contains the supplementary crystallographic data for this paper. These data can be obtained free of charge from The Cambridge Crystallographic Data Centre via [www.ccdc.cam.ac.uk/data\\_request/cif](http://www.ccdc.cam.ac.uk/data_request/cif).

**Table 1** Details of the X-ray structure determination of complex **3c**

|                                                 |                                                      |
|-------------------------------------------------|------------------------------------------------------|
| empirical formula                               | C <sub>26</sub> H <sub>36</sub> ClN <sub>2</sub> NiP |
| fw                                              | 501.70                                               |
| crystal system                                  | orthorhombic                                         |
| space group                                     | <i>P</i> <sub>na21</sub>                             |
| <i>a</i> (Å)                                    | 19.6835(2)                                           |
| <i>b</i> (Å)                                    | 8.27190(10)                                          |
| <i>c</i> (Å)                                    | 31.3730(3)                                           |
| $\alpha$ (deg)                                  | 90.00                                                |
| $\beta$ (deg)                                   | 90.00                                                |
| $\gamma$ (deg)                                  | 90.00                                                |
| <i>V</i> (Å <sup>3</sup> )                      | 5108.15(9)                                           |
| <i>Z</i>                                        | 8                                                    |
| <i>D</i> <sub>calcd</sub> (g cm <sup>-3</sup> ) | 1.305                                                |
| <i>F</i> (000)                                  | 2128.0                                               |
| $\mu$ (mm <sup>-1</sup> )                       | 2.754                                                |
| 2 $\theta$ range for data collec (deg)          | 8.98 to 125.52                                       |
| no. of reflns collected                         | 29453                                                |
| no. of indep reflns ( <i>R</i> <sub>int</sub> ) | 7437 (0.0296)                                        |

|                                                        |                                 |
|--------------------------------------------------------|---------------------------------|
| no. of data/ restraints/params                         | 7437/1/563                      |
| goodness of fit on $F^2$                               | 1.033                           |
| final $R$ indices [ $I > 2\sigma(I)$ ]                 | $R1 = 0.0311$<br>$wR2 = 0.0840$ |
| $R$ indices (all data)                                 | $R1 = 0.0326$<br>$wR2 = 0.0856$ |
| largest diff peak and hole<br>[ $e \text{ \AA}^{-3}$ ] | 0.33 and $-0.19$                |

## References

- 1 L. G. L. Ward, *Inorg. Synth.* 1971, **13**, 154.
- 2 R. Lindner, B. van den Bosch, M. Lutz, J. N. H. Reek, J. I. van der Vlugt, *Organometallics* 2011, **30**, 499.
- 3 G. M. Sheldrick, *Acta Crystallogr., Sect. A* 1990, **46**, 467.
- 4 G. M. Sheldrick, *SHELXL97, Programs for Structure Refinement*; Universität Göttingen, Göttingen, Germany, 1997.

Copies of  $^1\text{H}$ ,  $^{13}\text{C}$  and  $^{31}\text{P}$  NMR spectra of complexes 3a-3c

1. [(L1)NiCl] (3a)

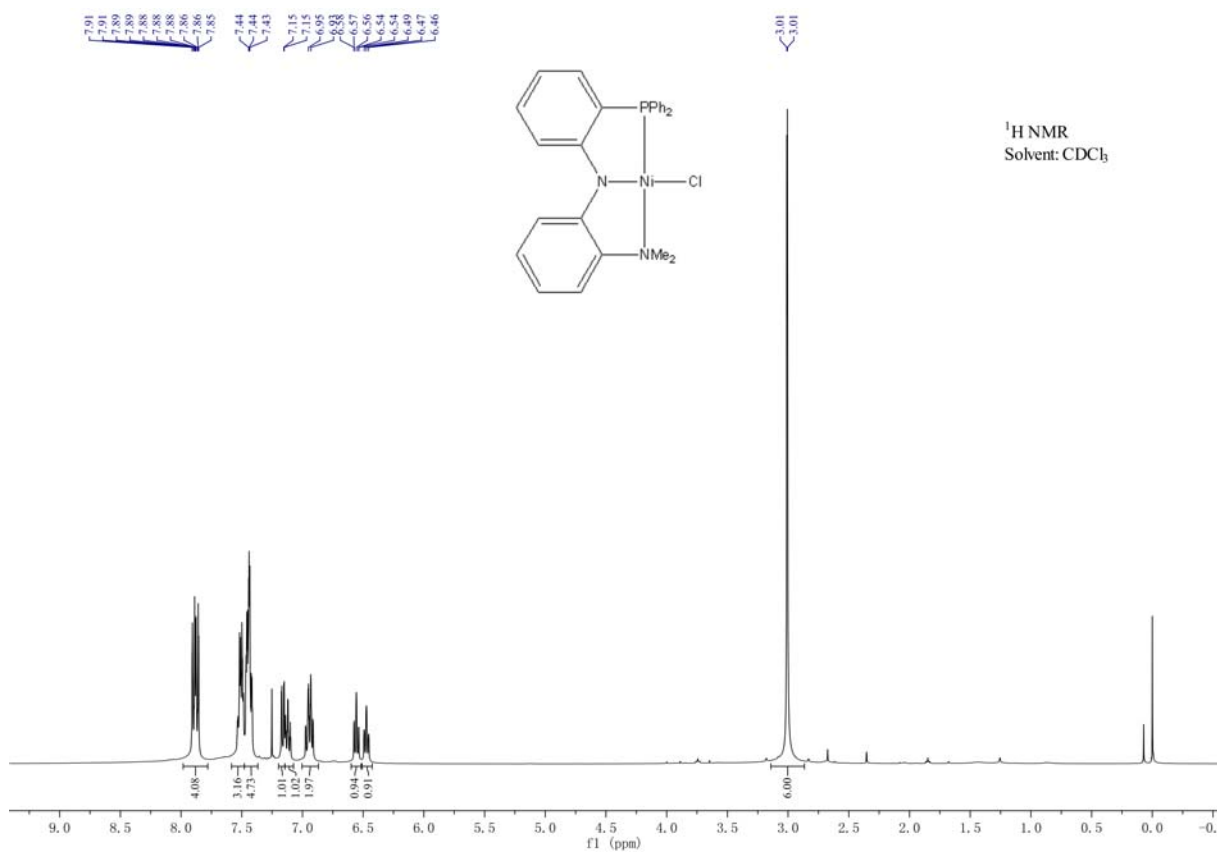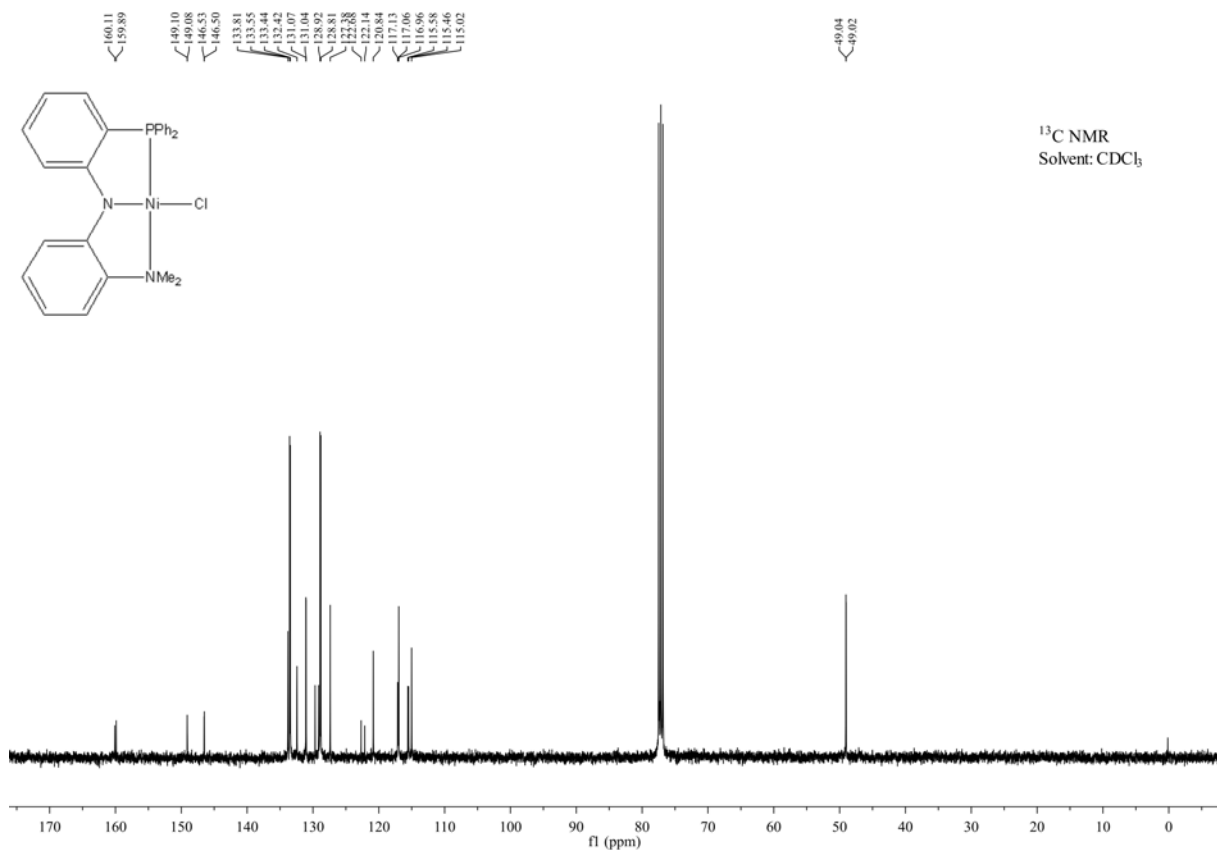

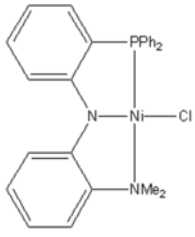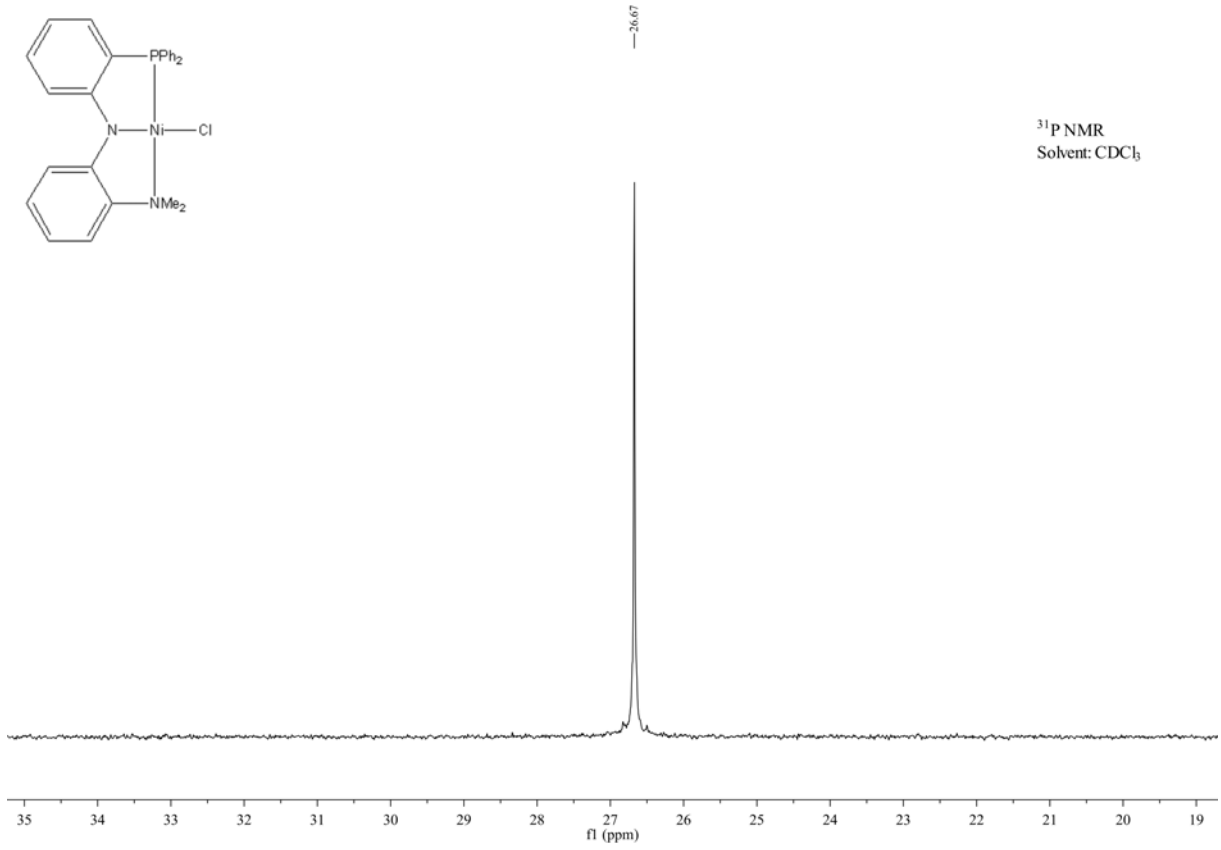



[(L2)NiCl] (**3b**)

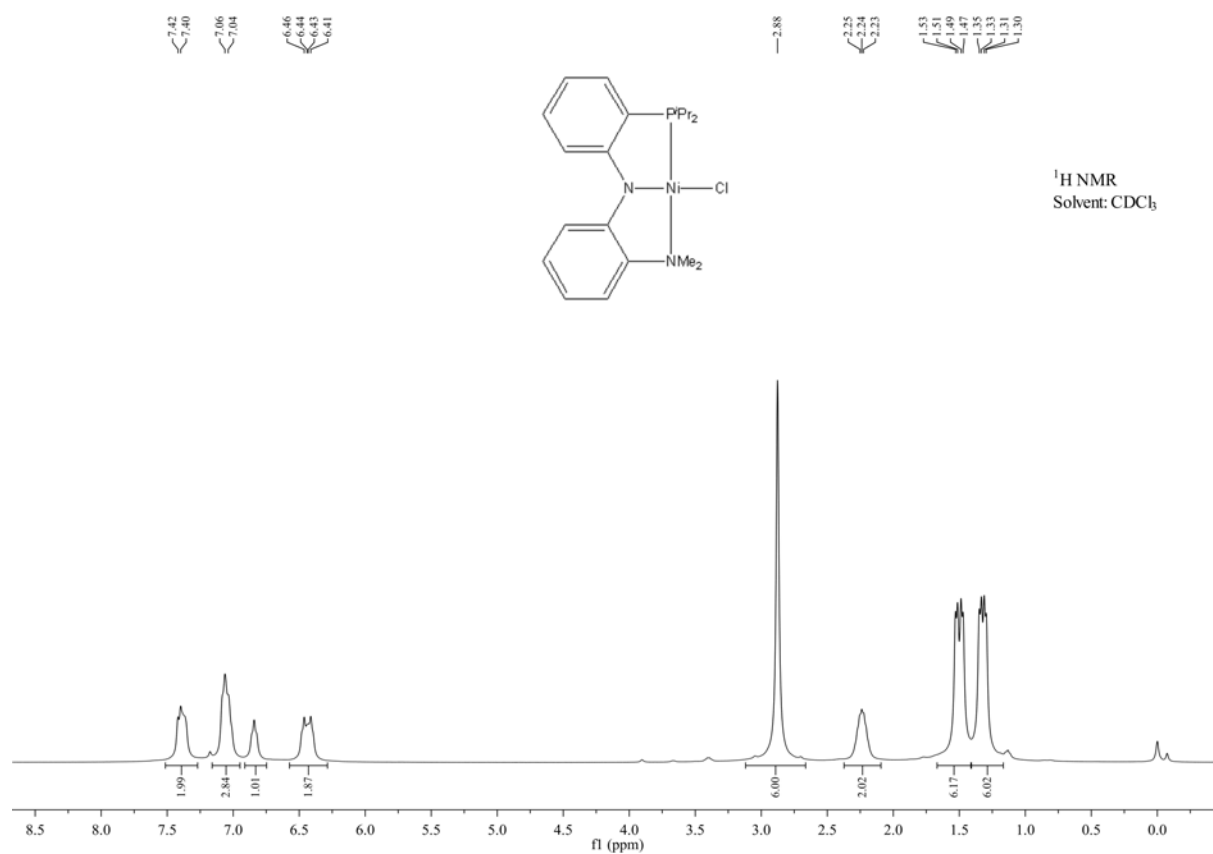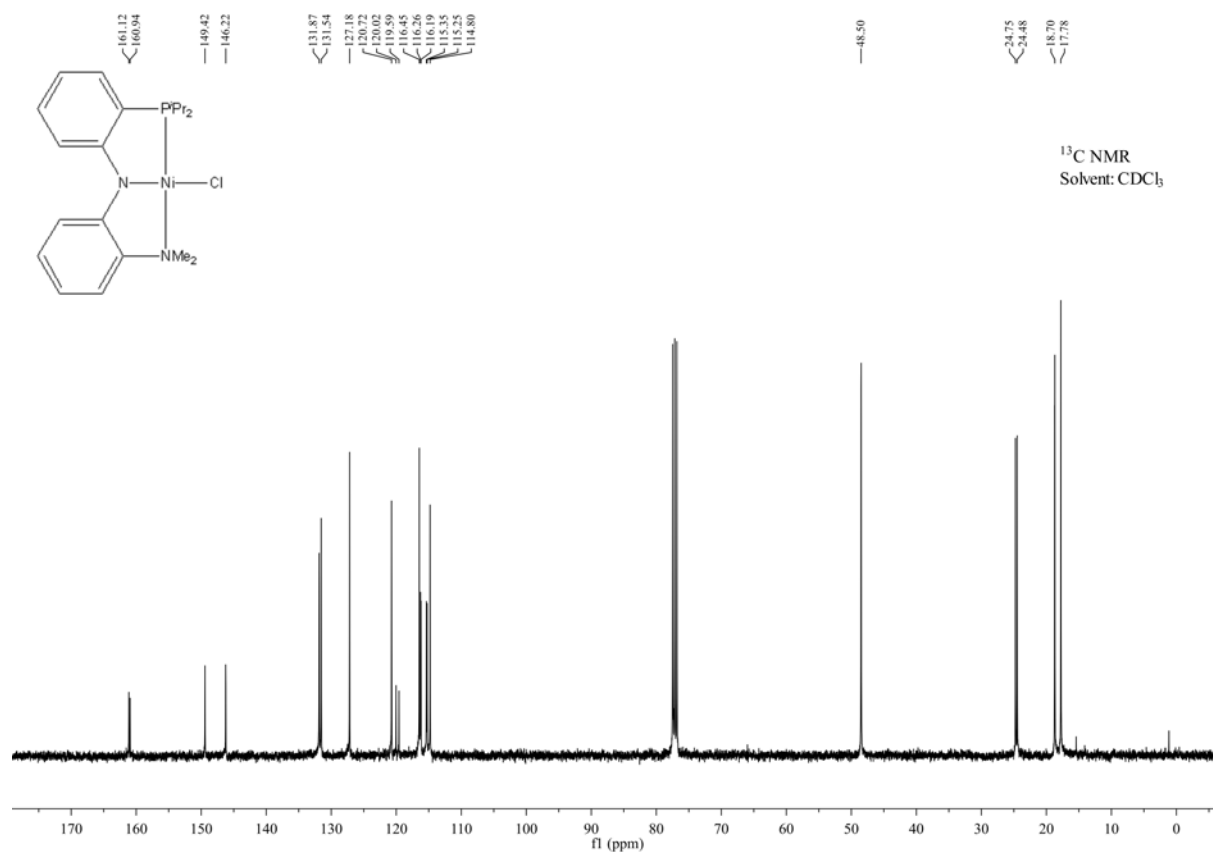

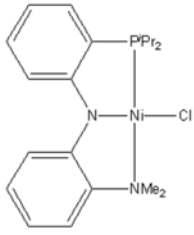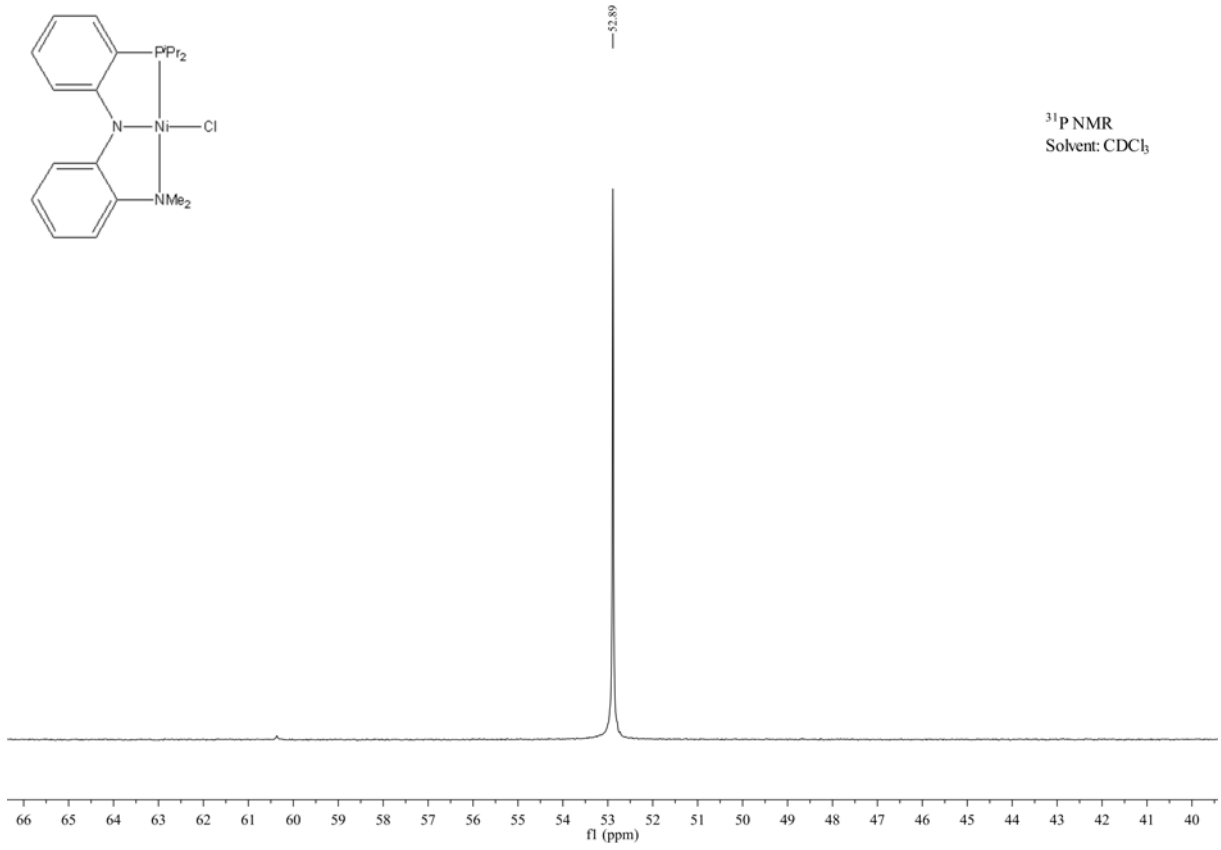

[(L3)NiCl] (**3c**)

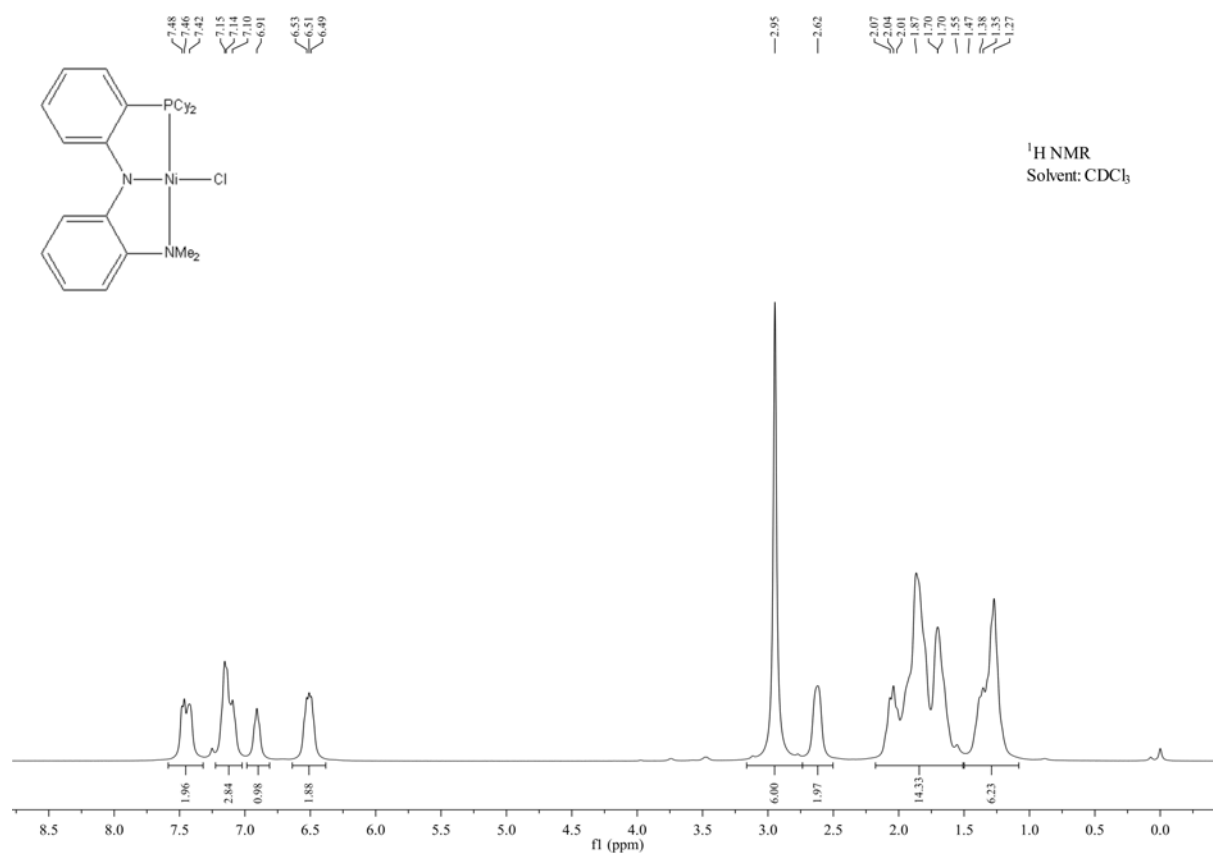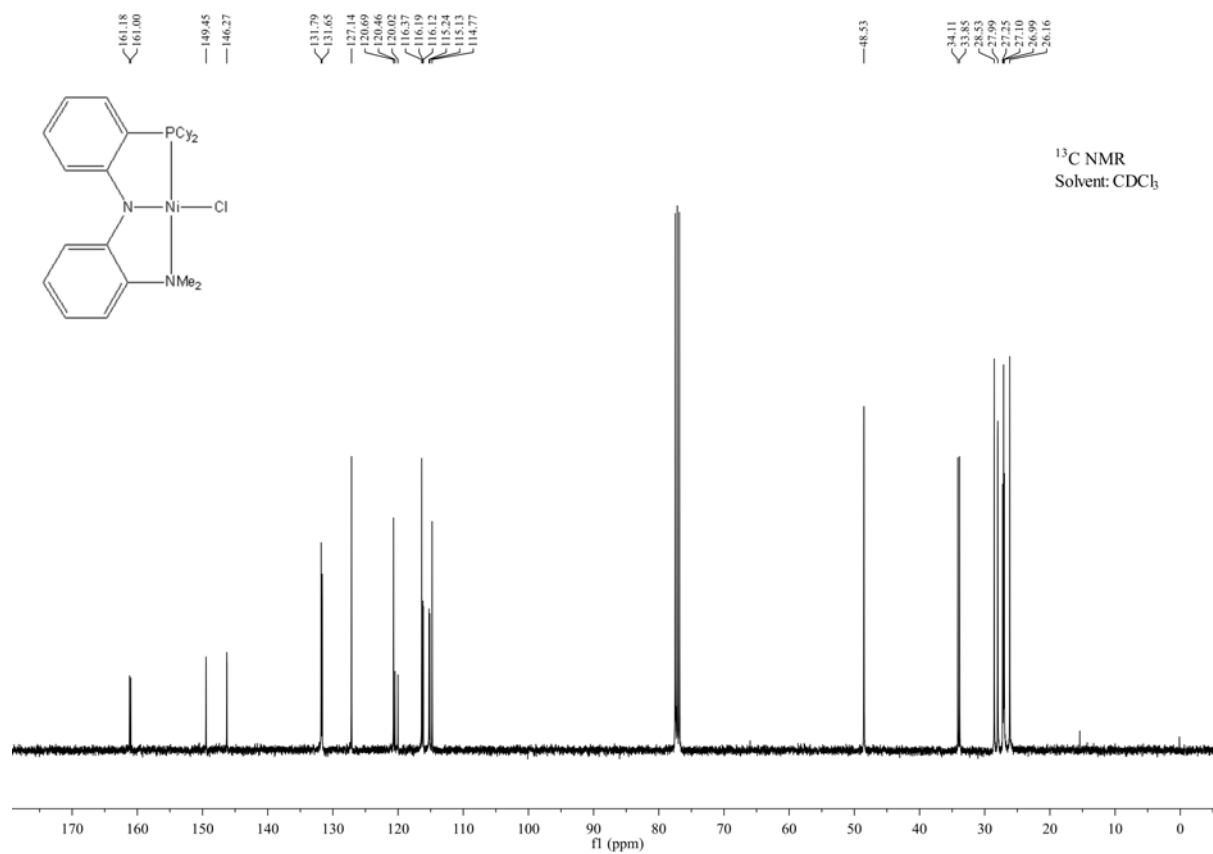

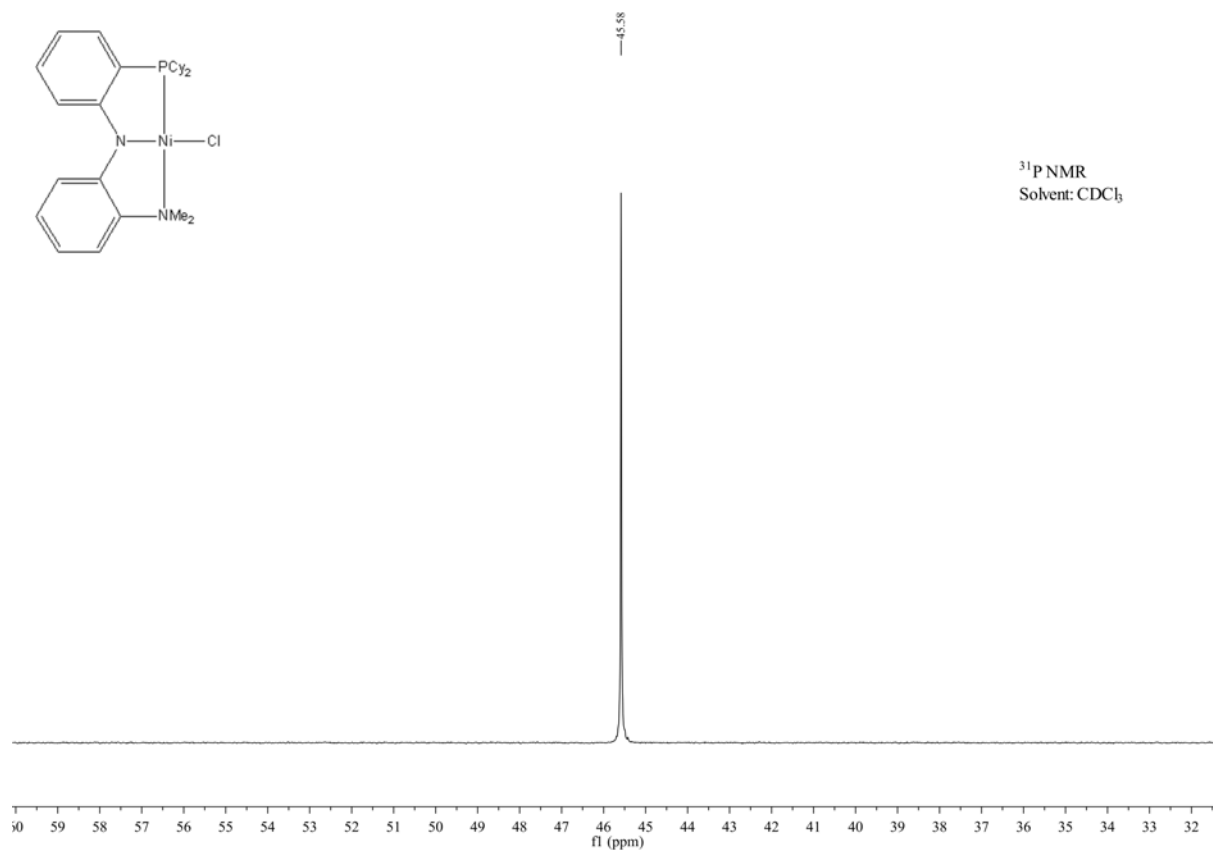

# Copies of $^1\text{H}$ and $^{13}\text{C}$ NMR spectra of the cross-coupling products

## 1. 4-Methoxy-4'-methylbiphenyl

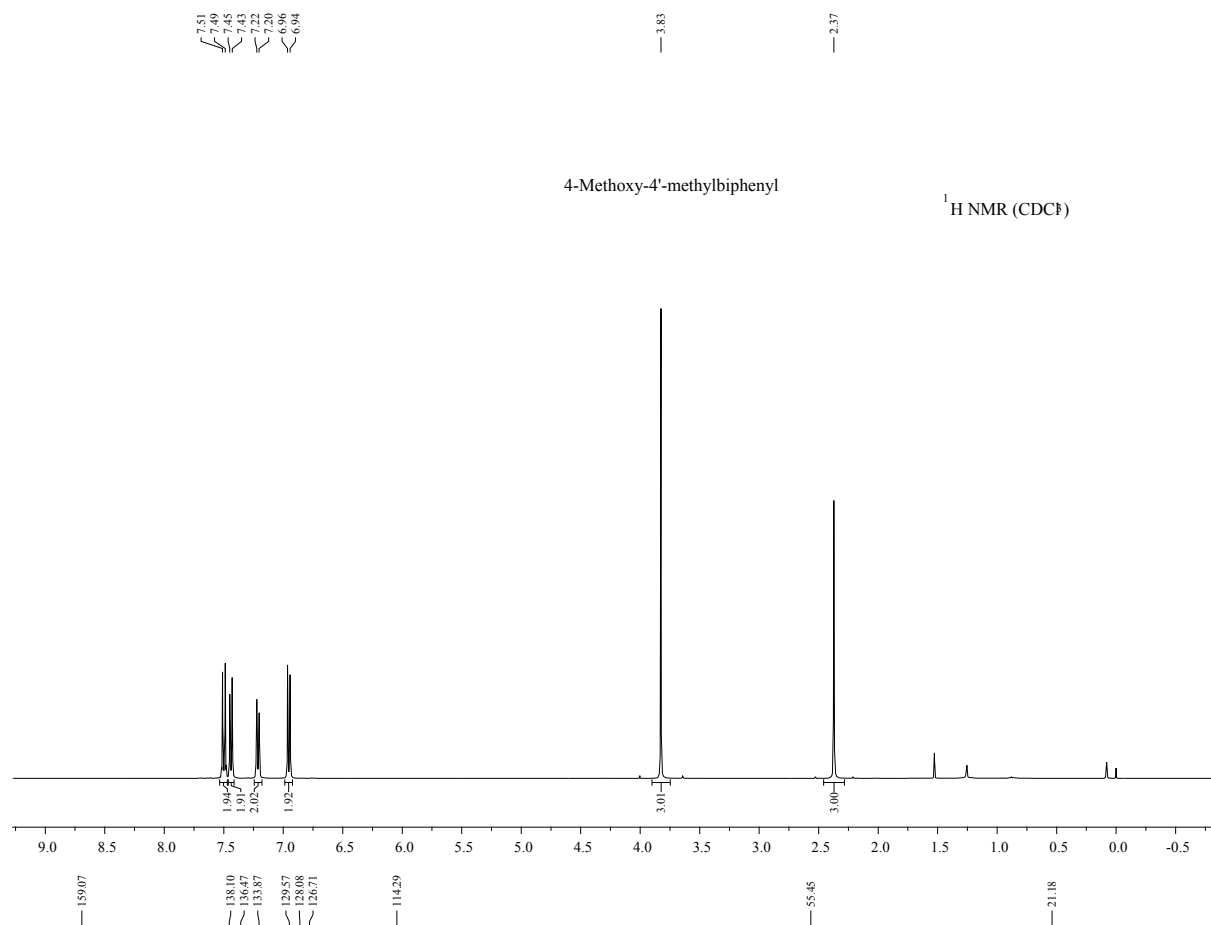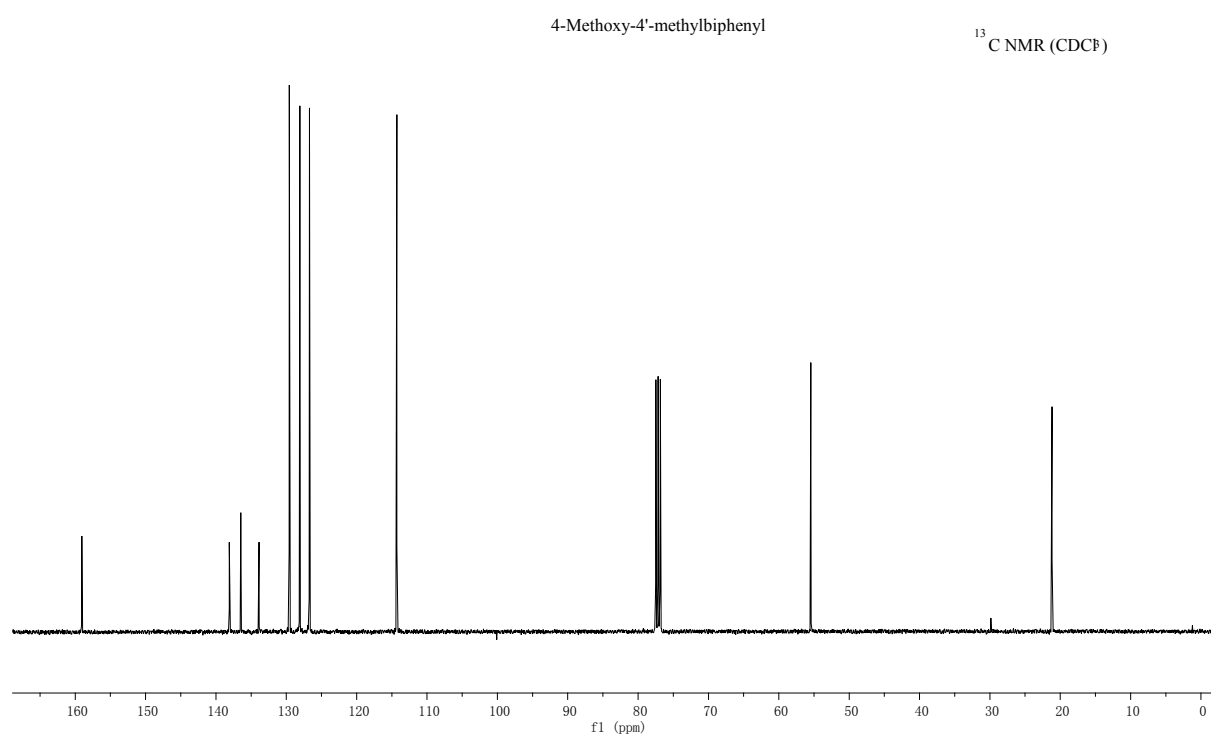

## 2. 3-Methoxy-4'-methylbiphenyl

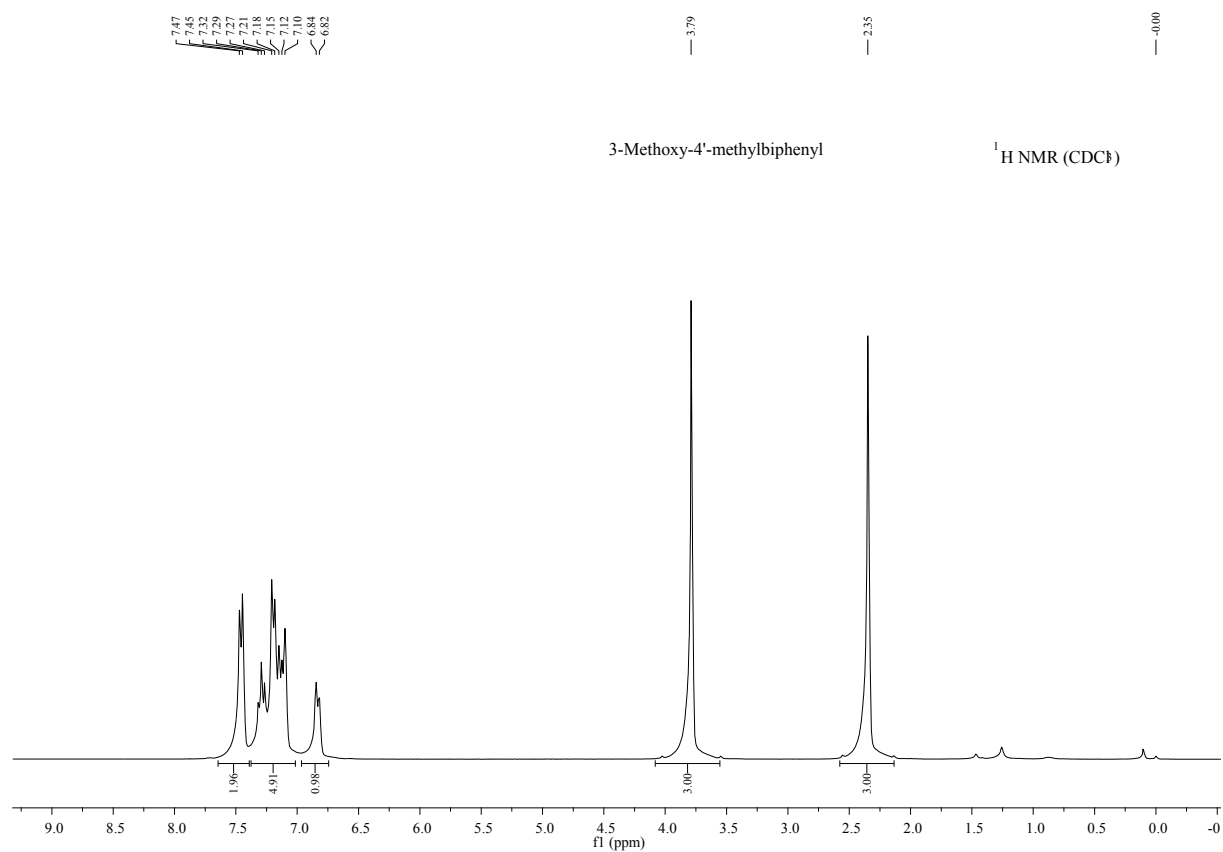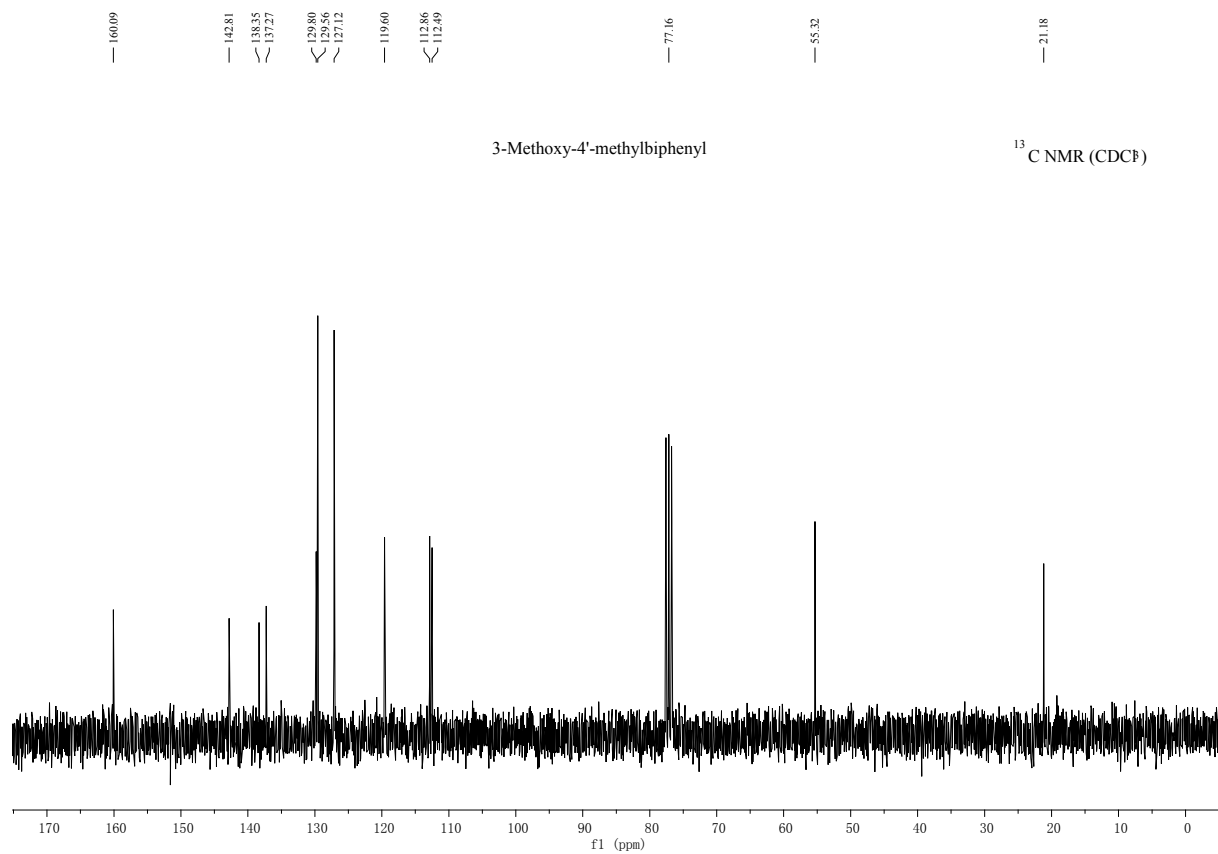

### 3. 4'-methyl-*N,N*-dimethylbiphenyl-4-amine

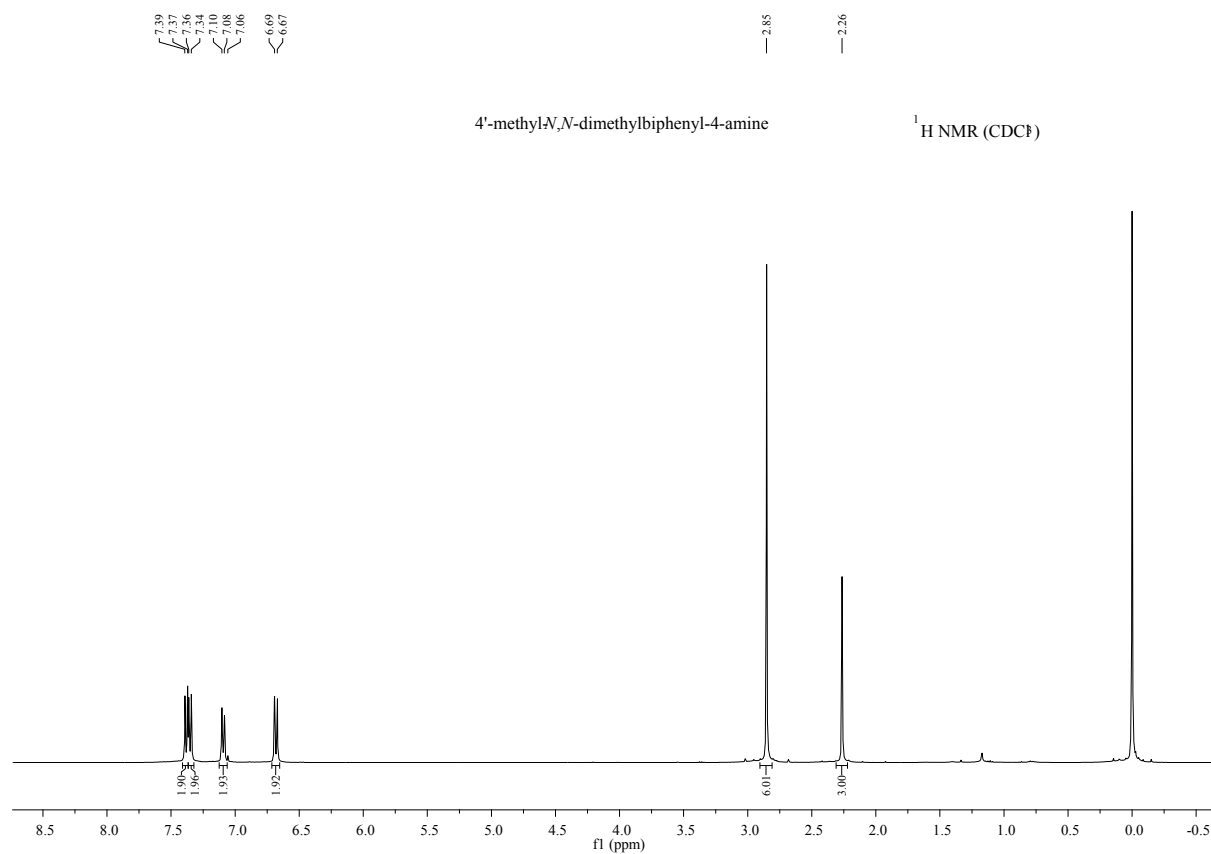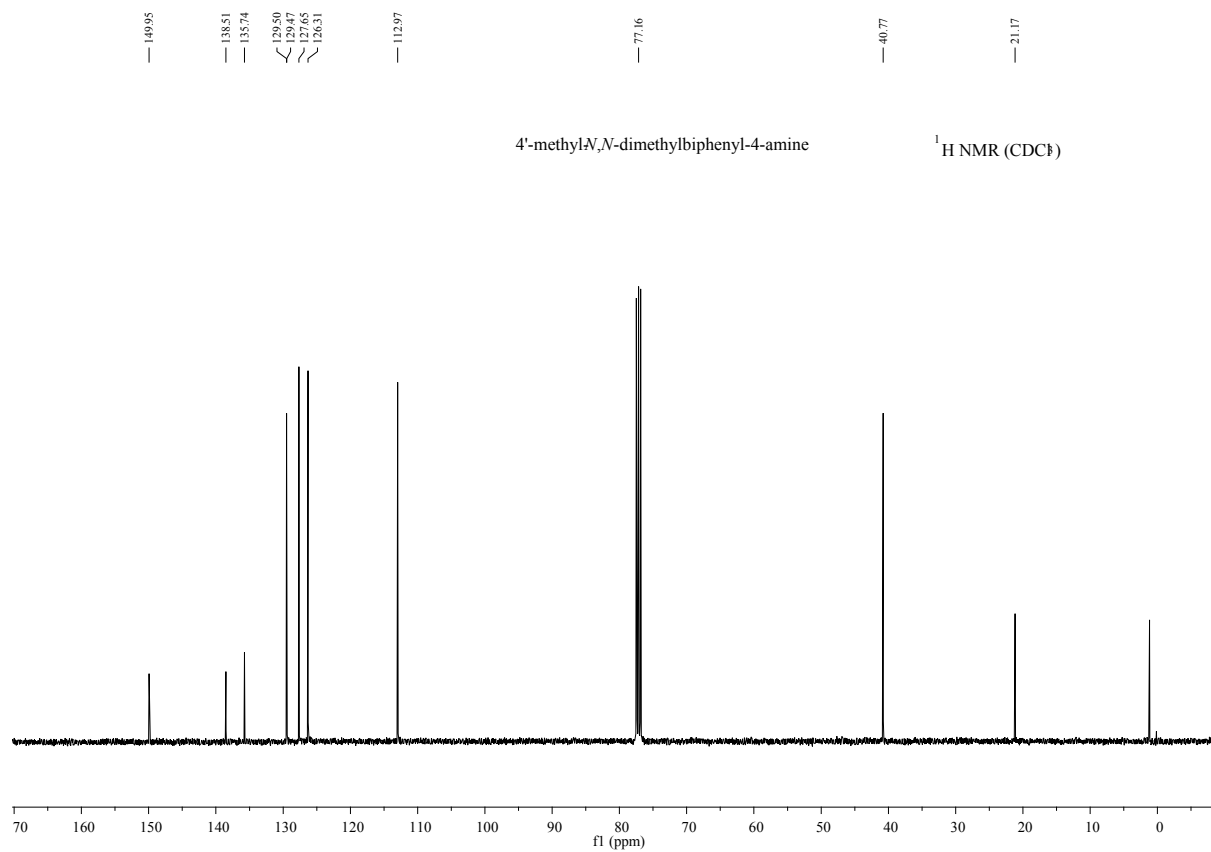

#### 4. 3,4-dimethoxy-4'-methylbiphenyl

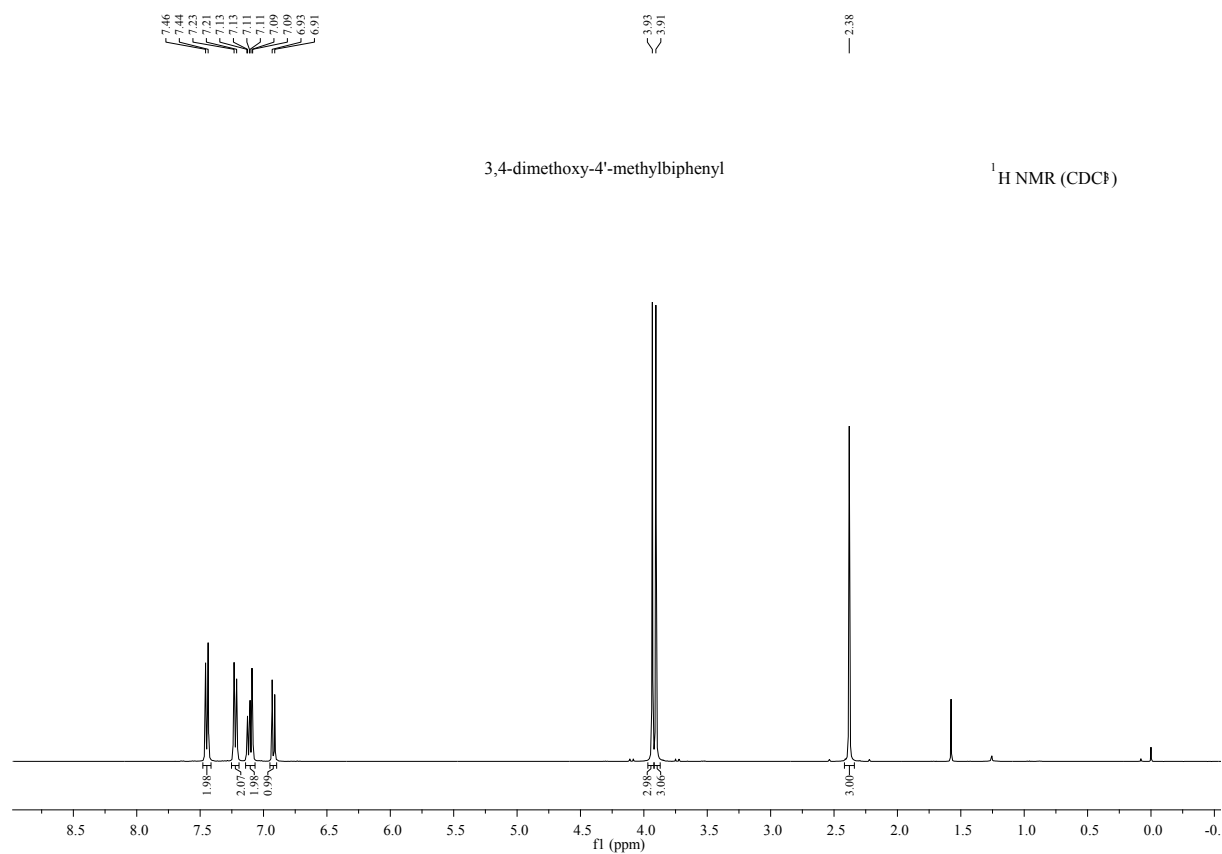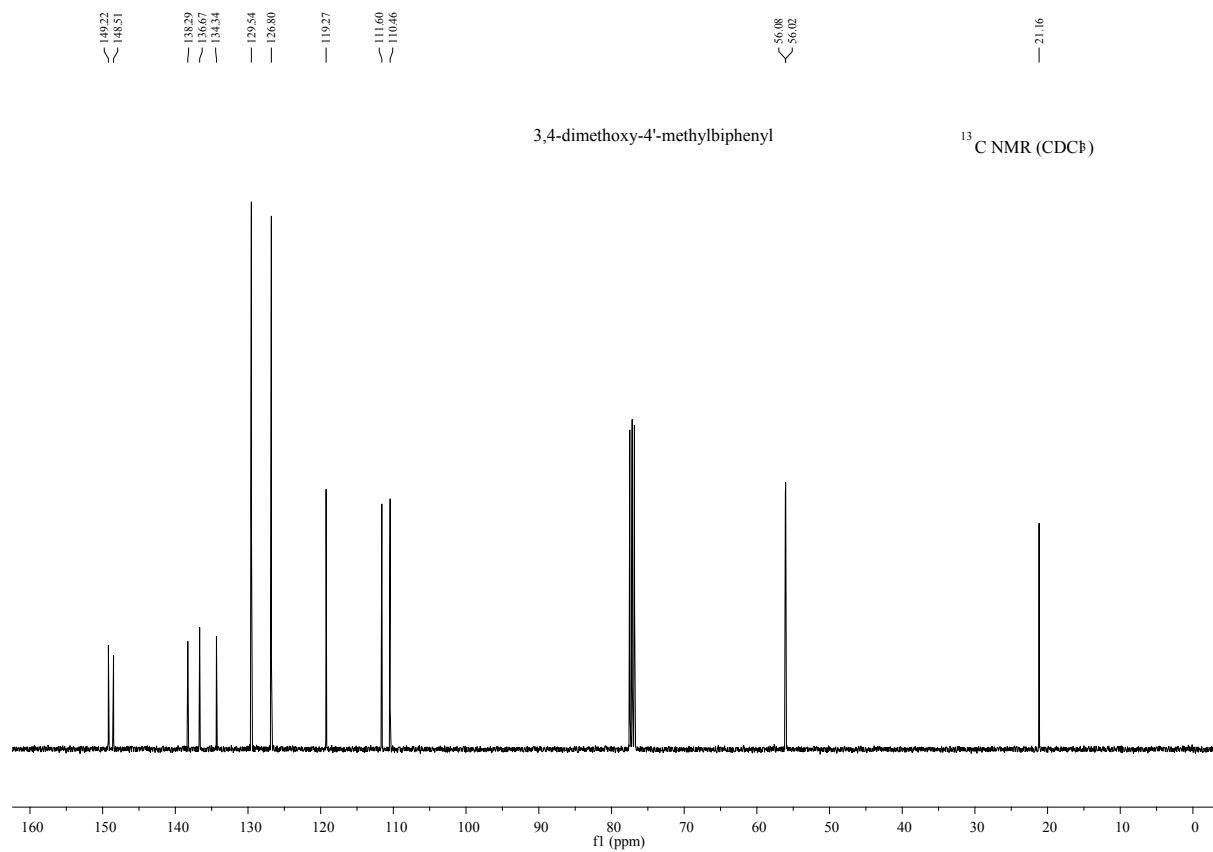



## 5. 3',4'- Dimethoxy- *N,N*-dimethylbiphenyl-4-amine

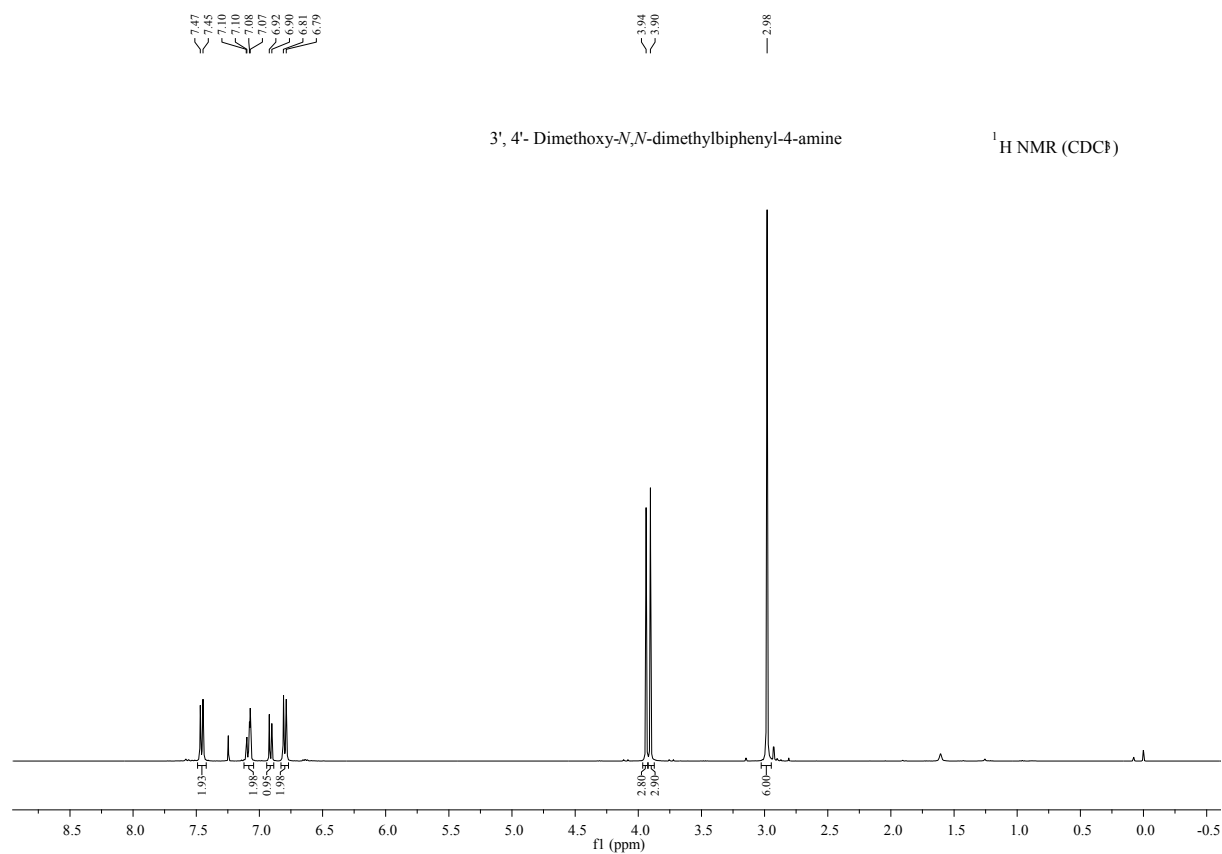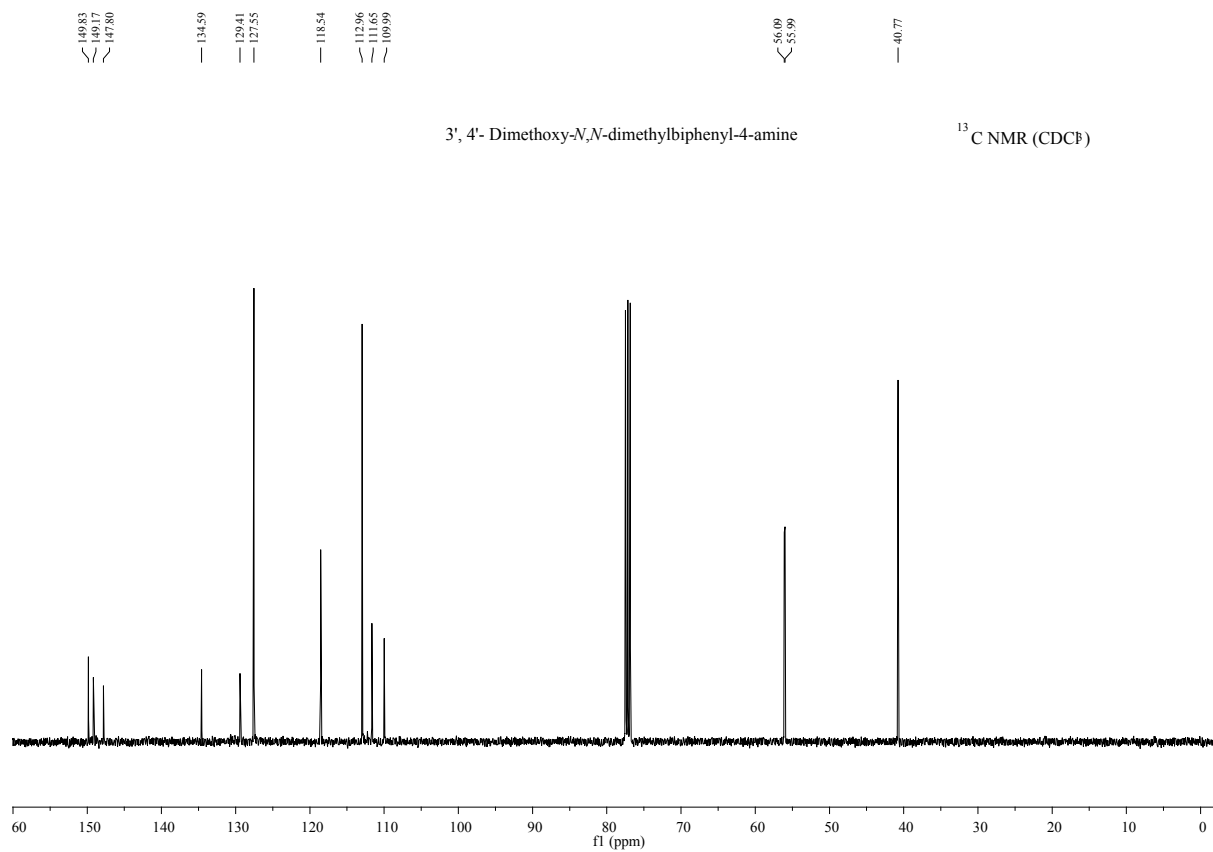

## 6. 1-Isopropyl-3-(4'-methylbiphenyl-4-yl)-1H-indole

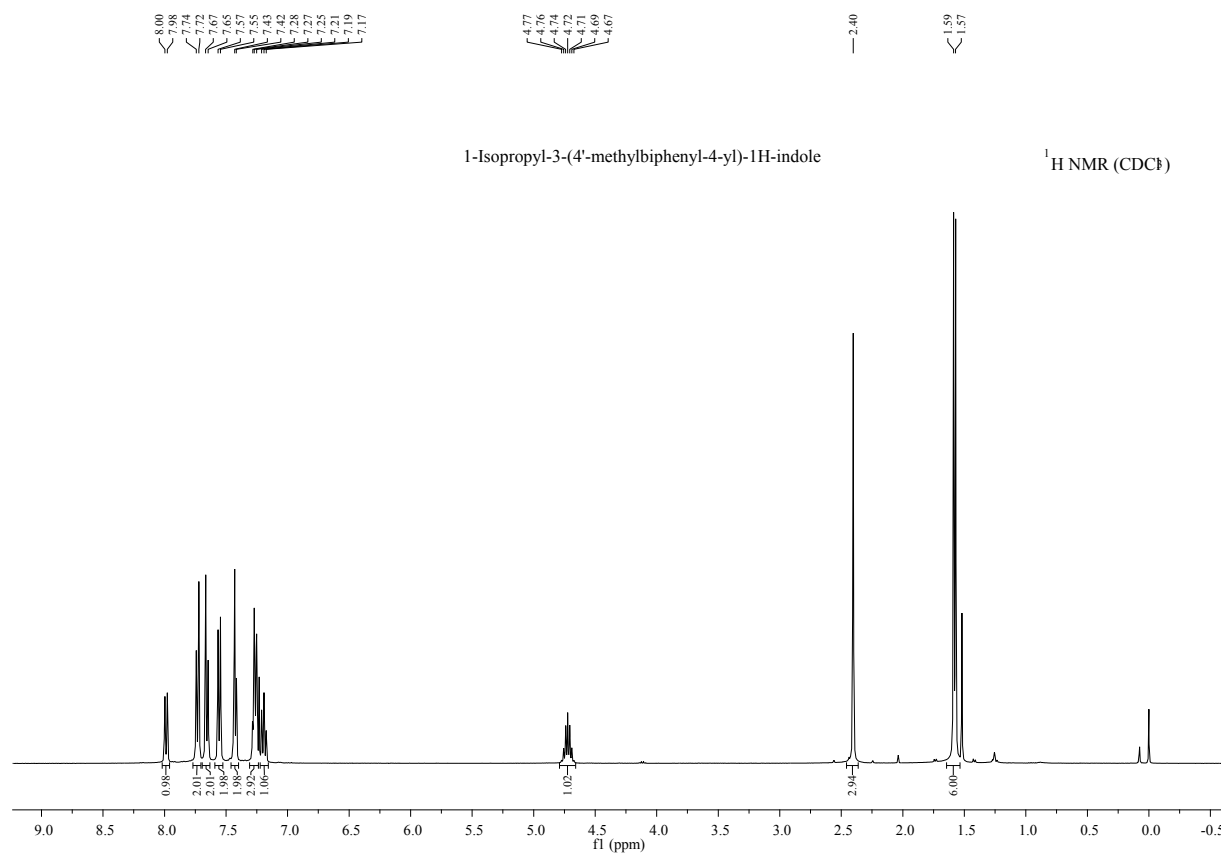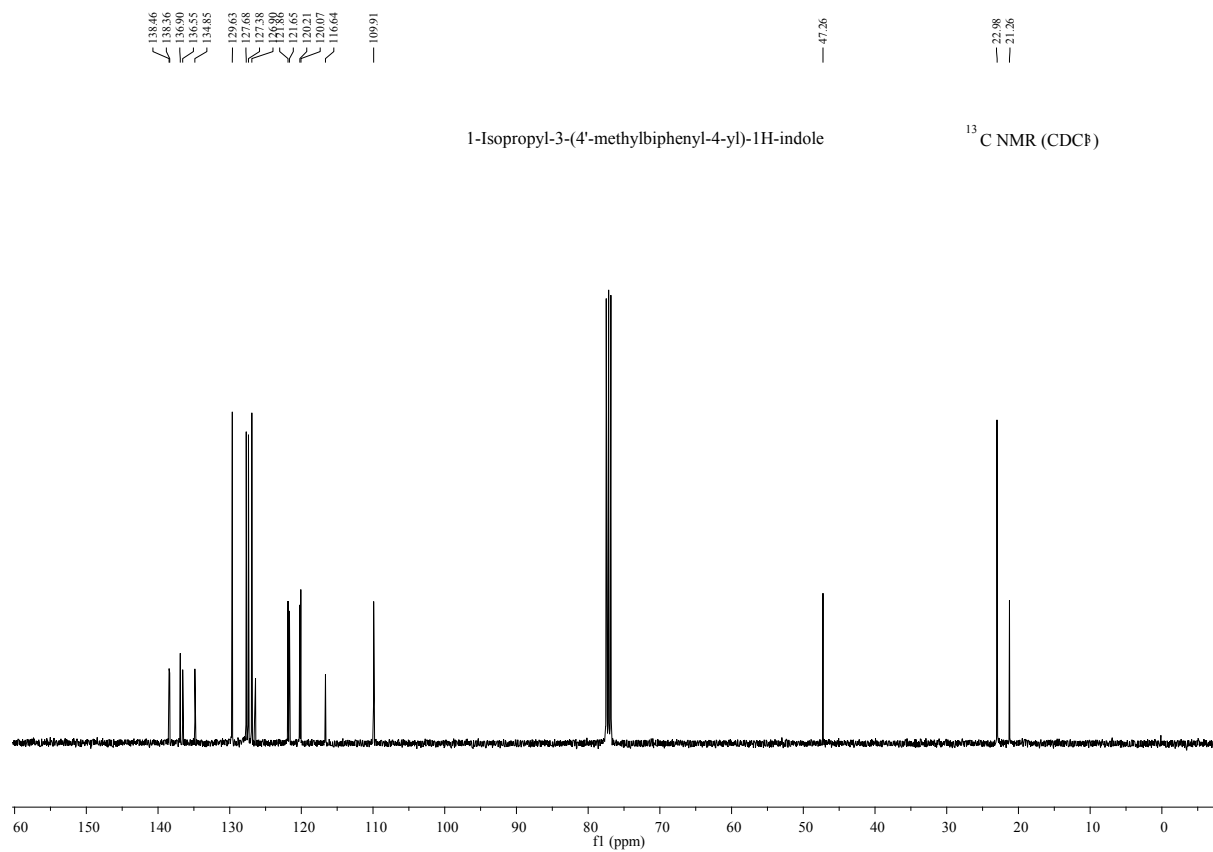

# 7. (4'-Methylbiphenyl-4-yl)methanol

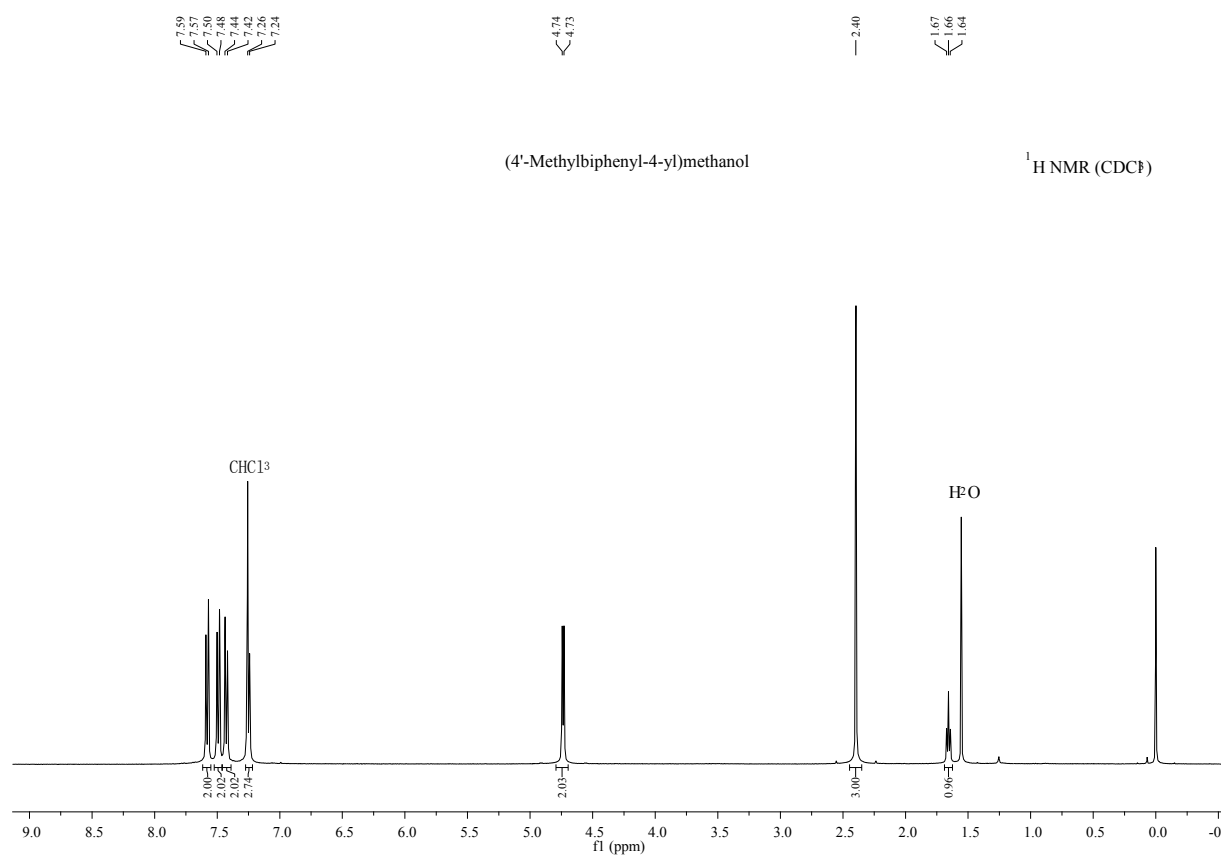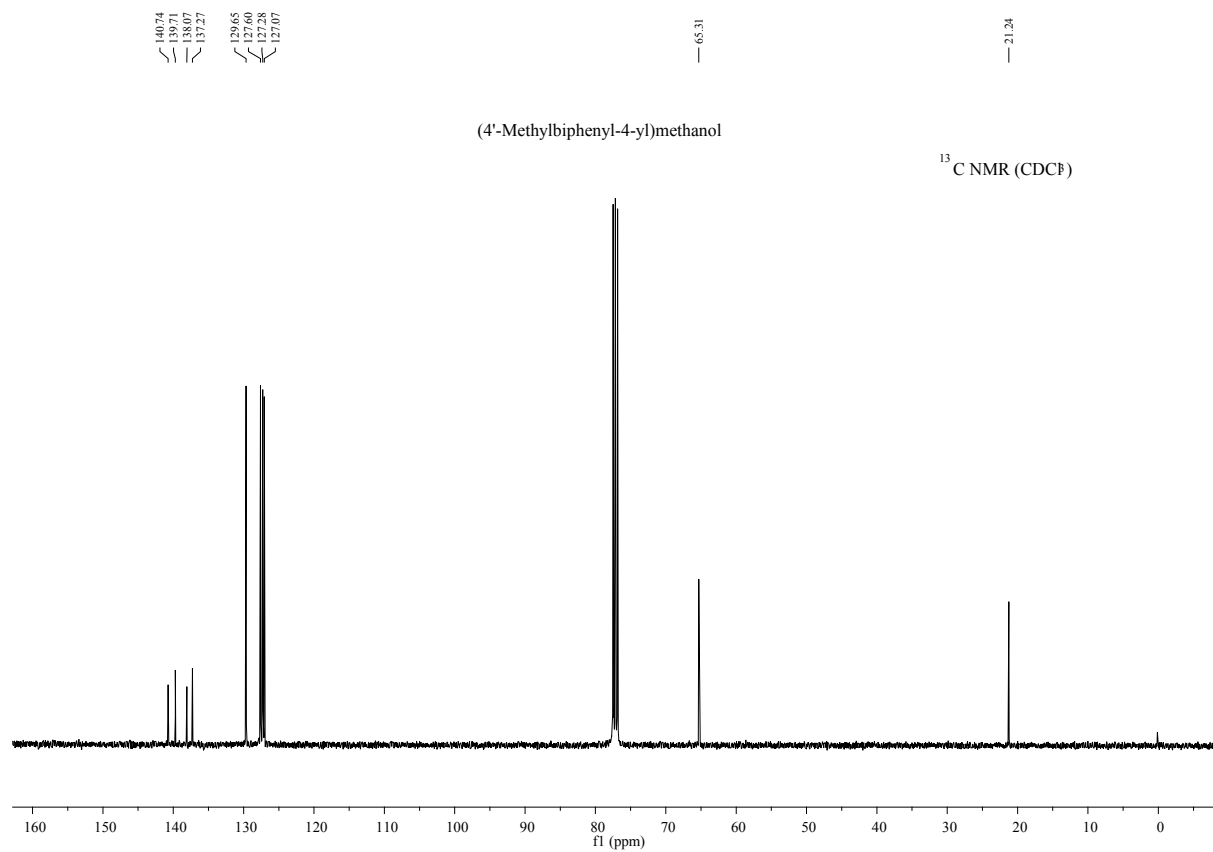

# 8. (4'-N, N-Dimethylaminobiphenyl-4-yl)methanol

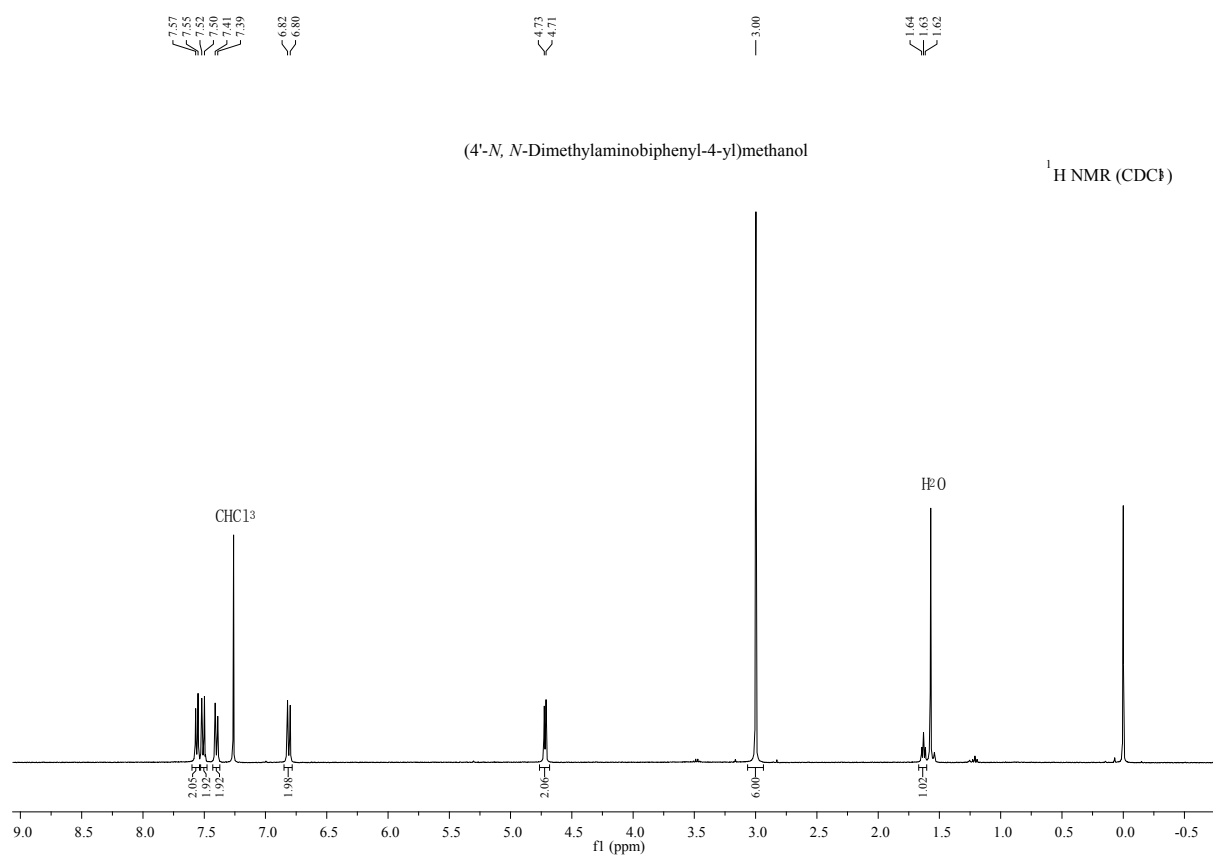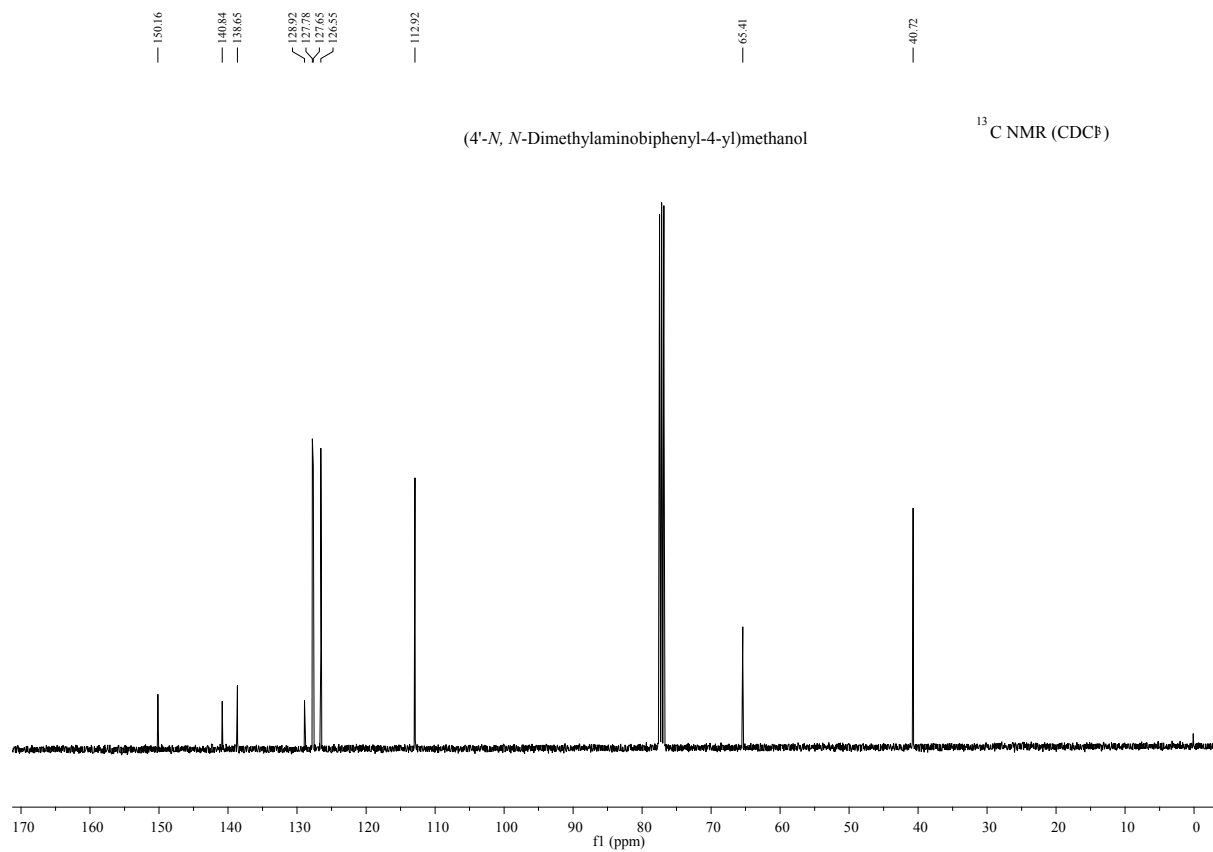

# 9. 2'-Methyl-*N,N*-dimethylbiphenyl-4-amine

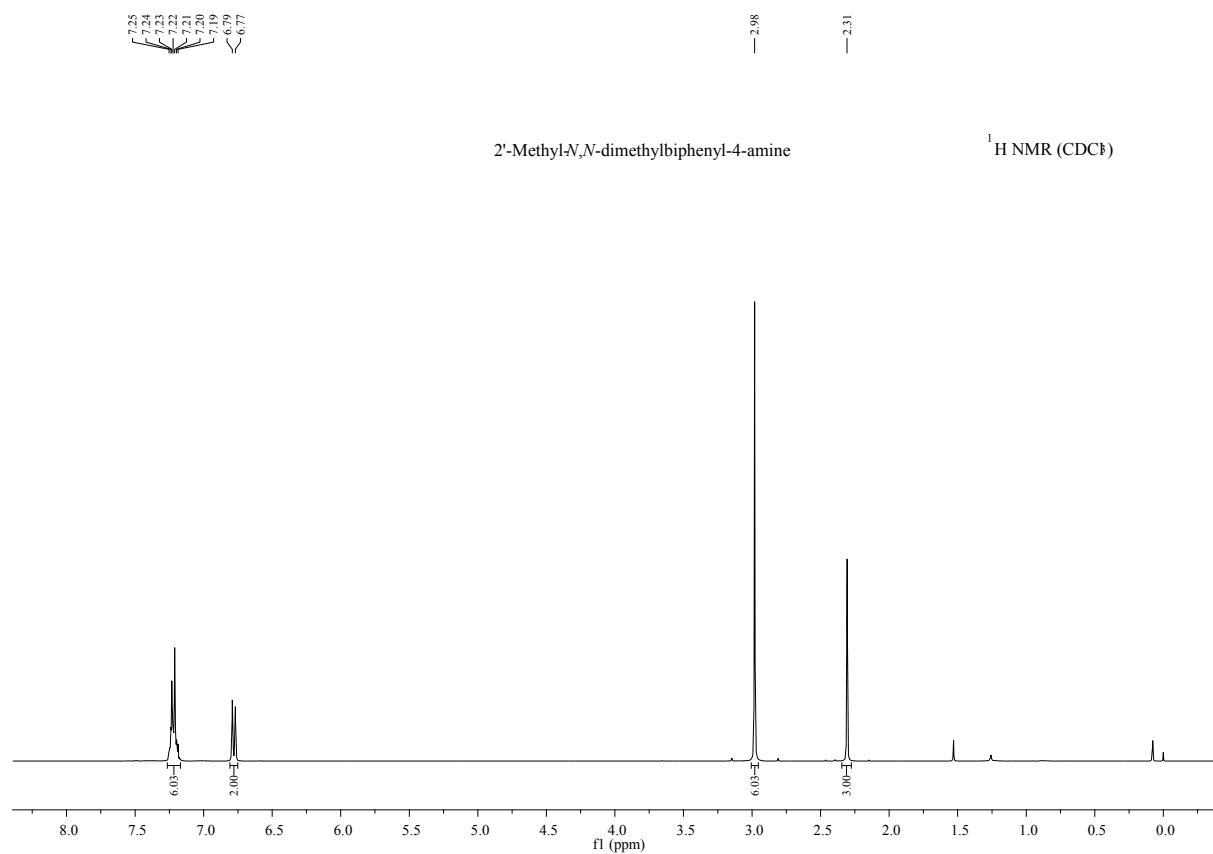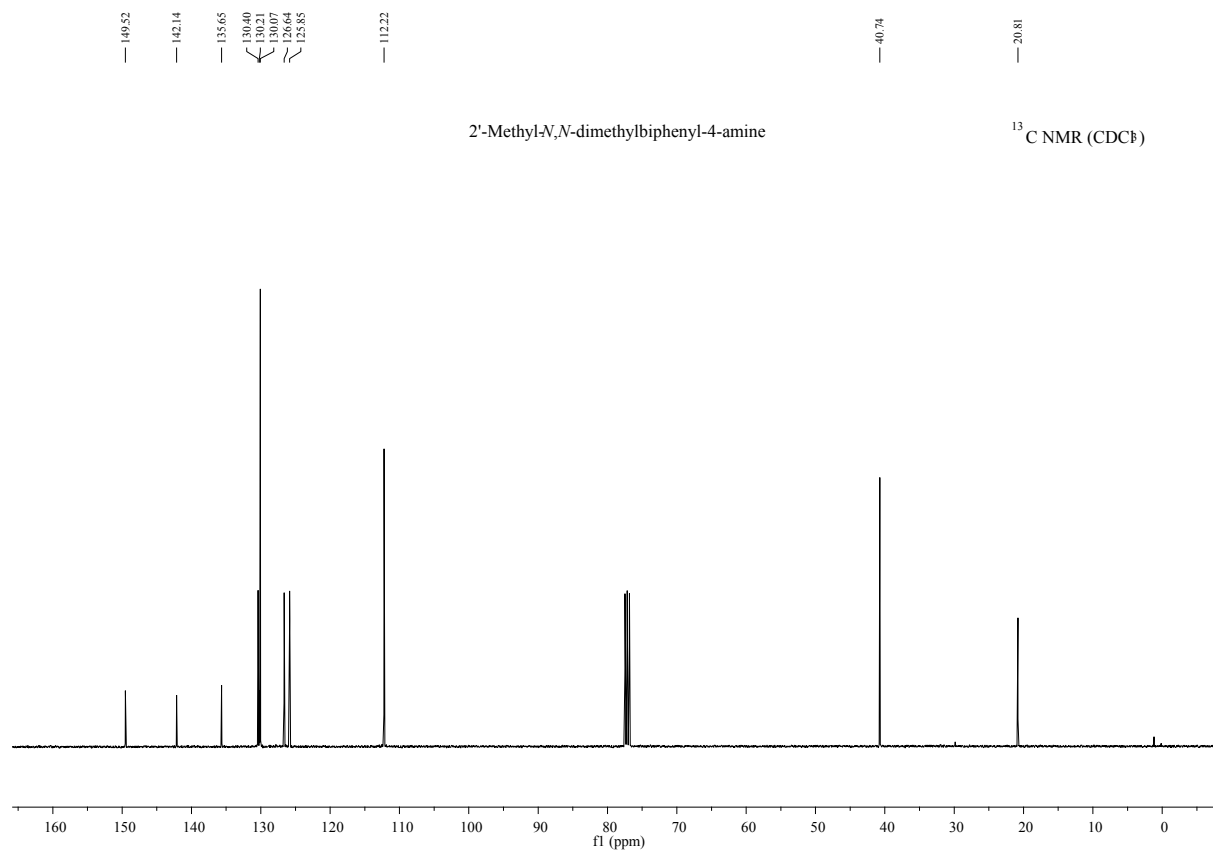

# 10. *N,N*-Dimethylbiphenyl-4-amine

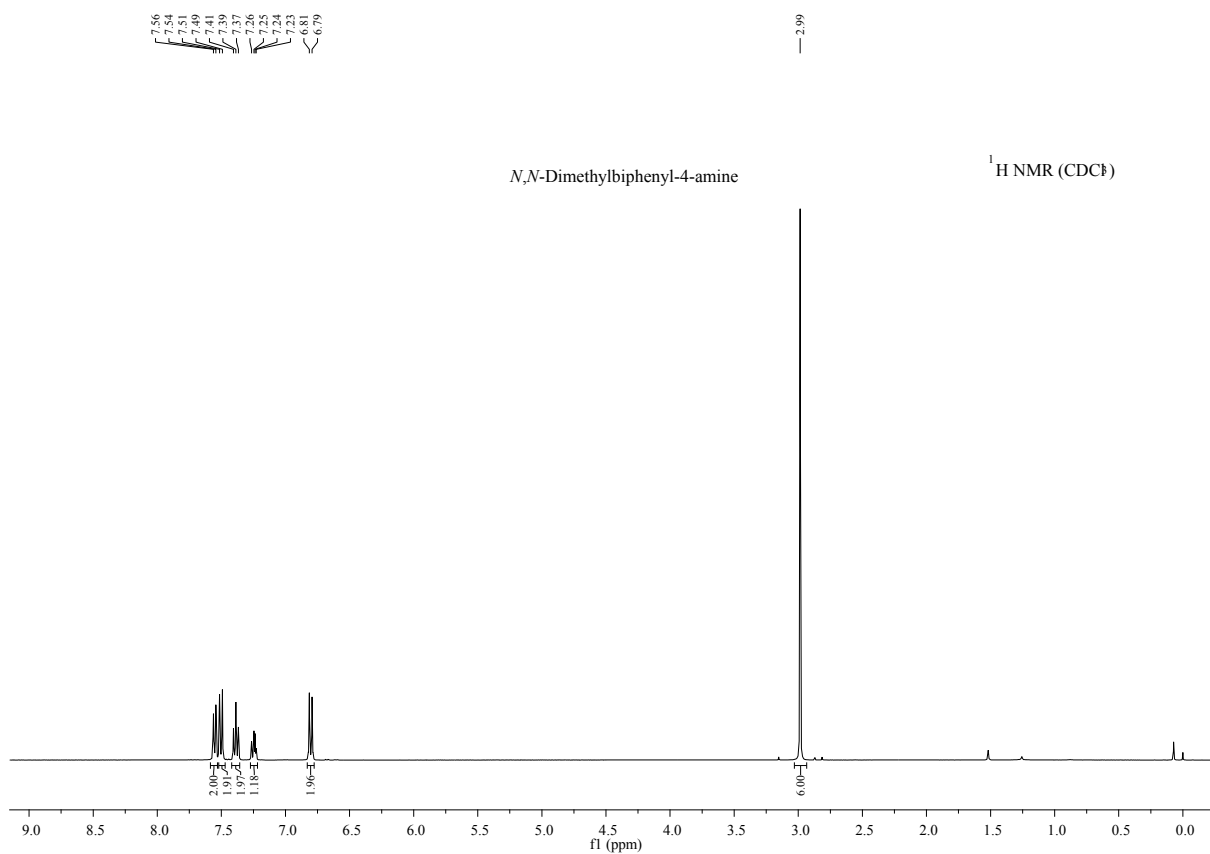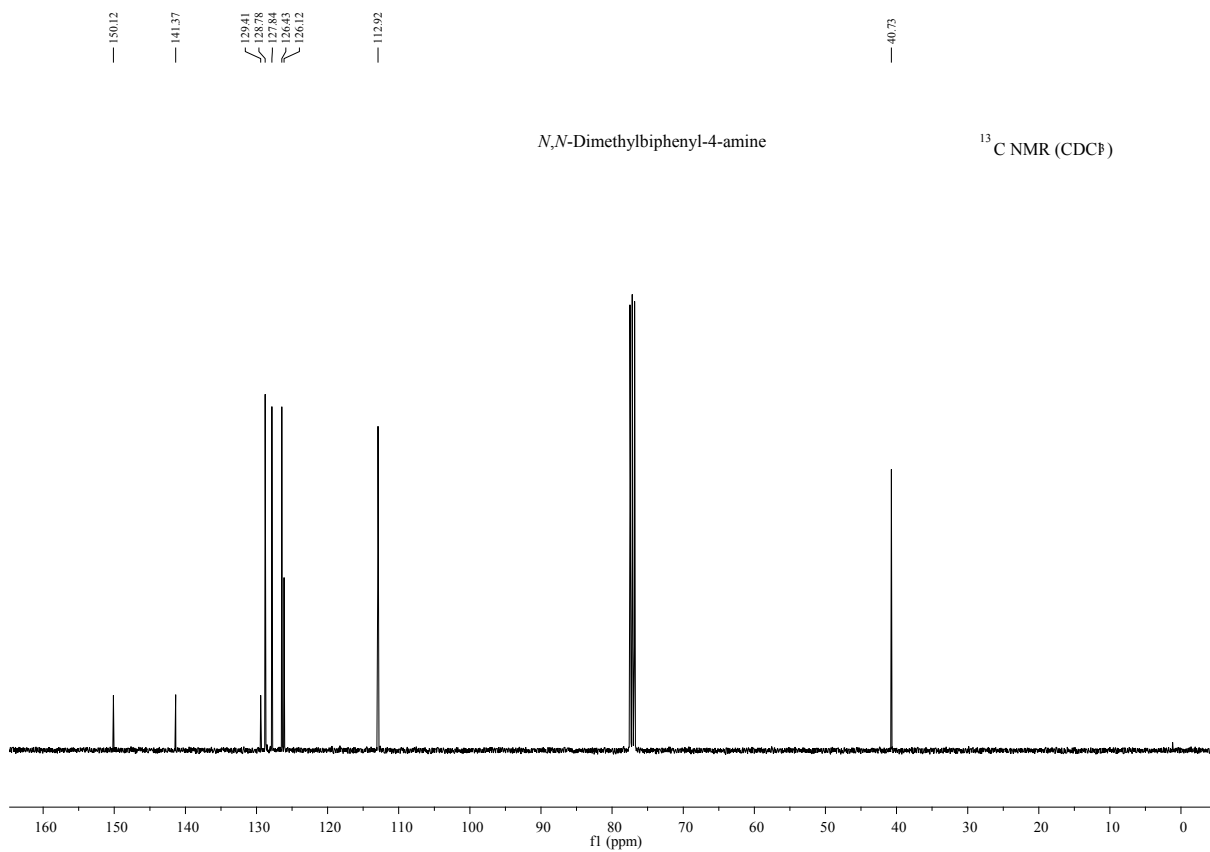

# 11. *N,N*-Dimethyl-(4-naphthalen-1-yl)aniline

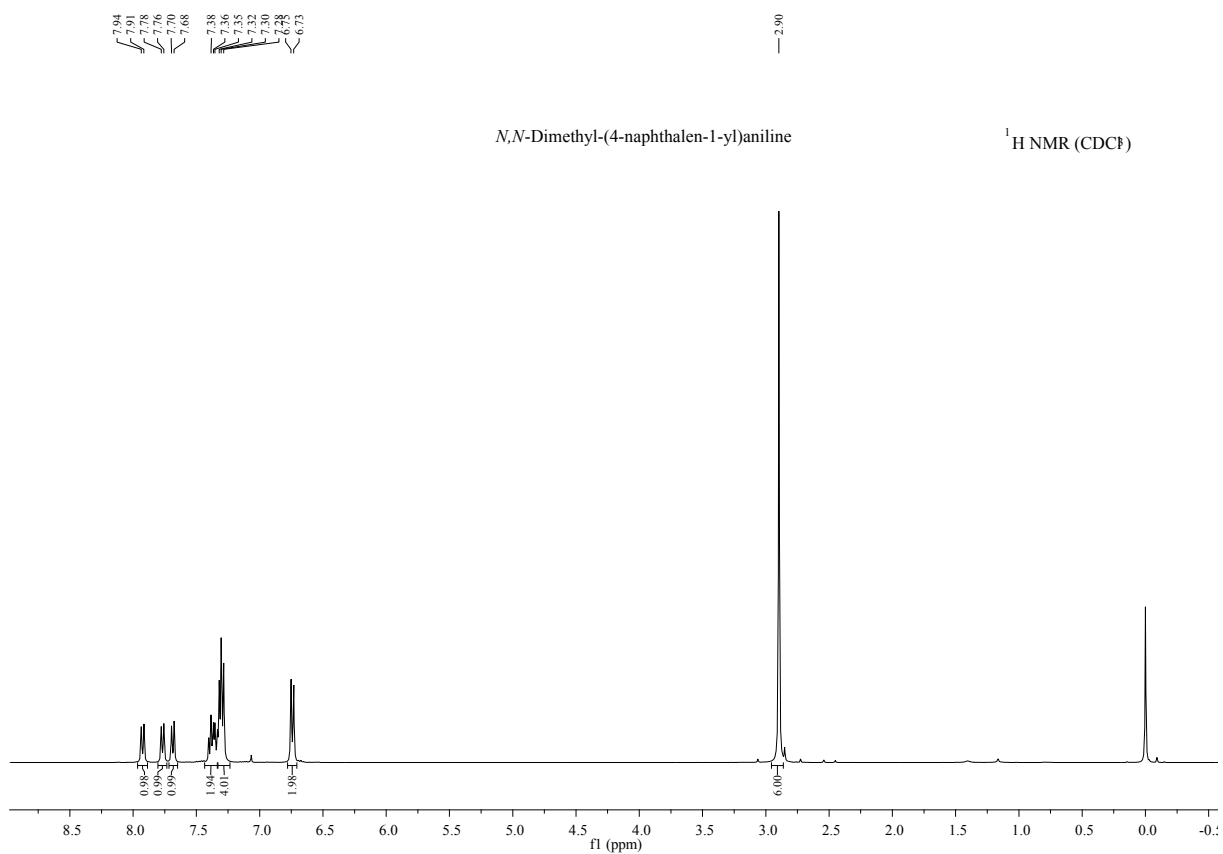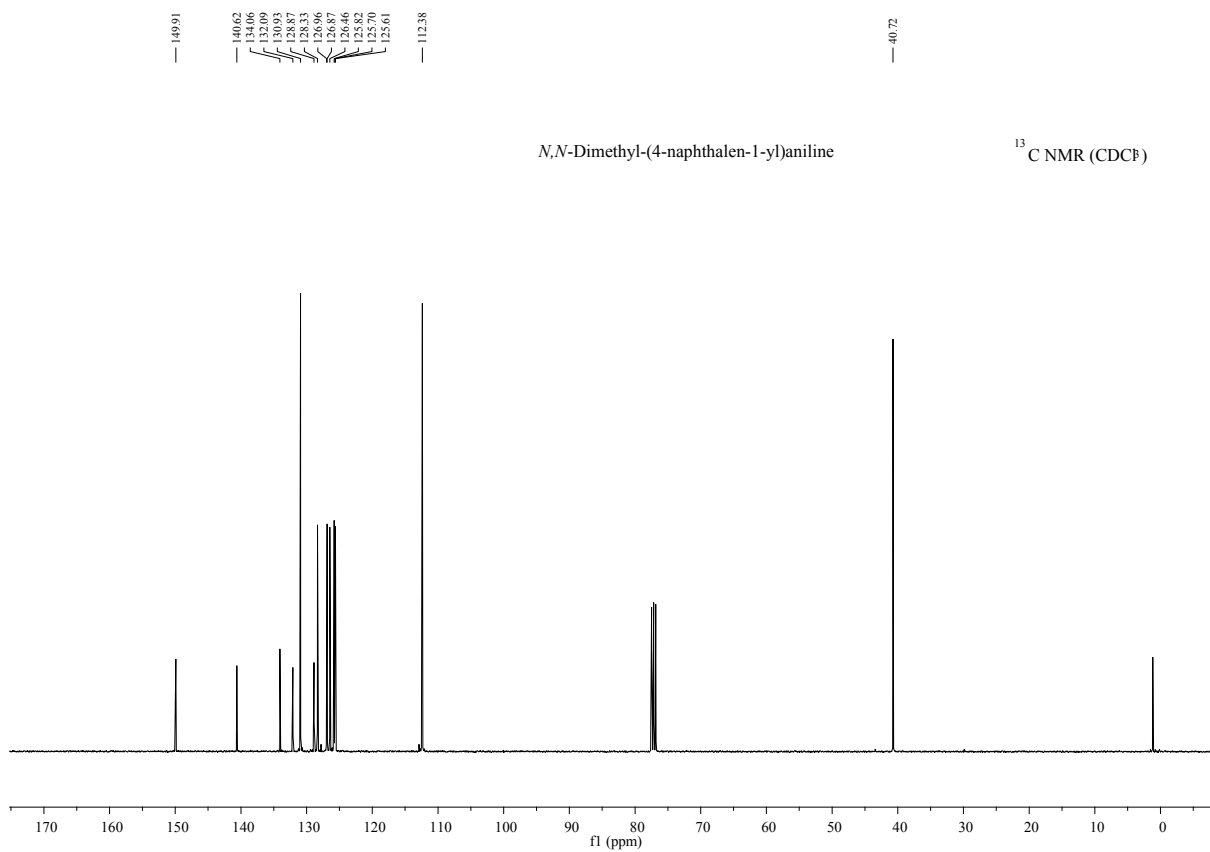

## 12. 4'-Methyl-4-(trifluoromethyl)biphenyl

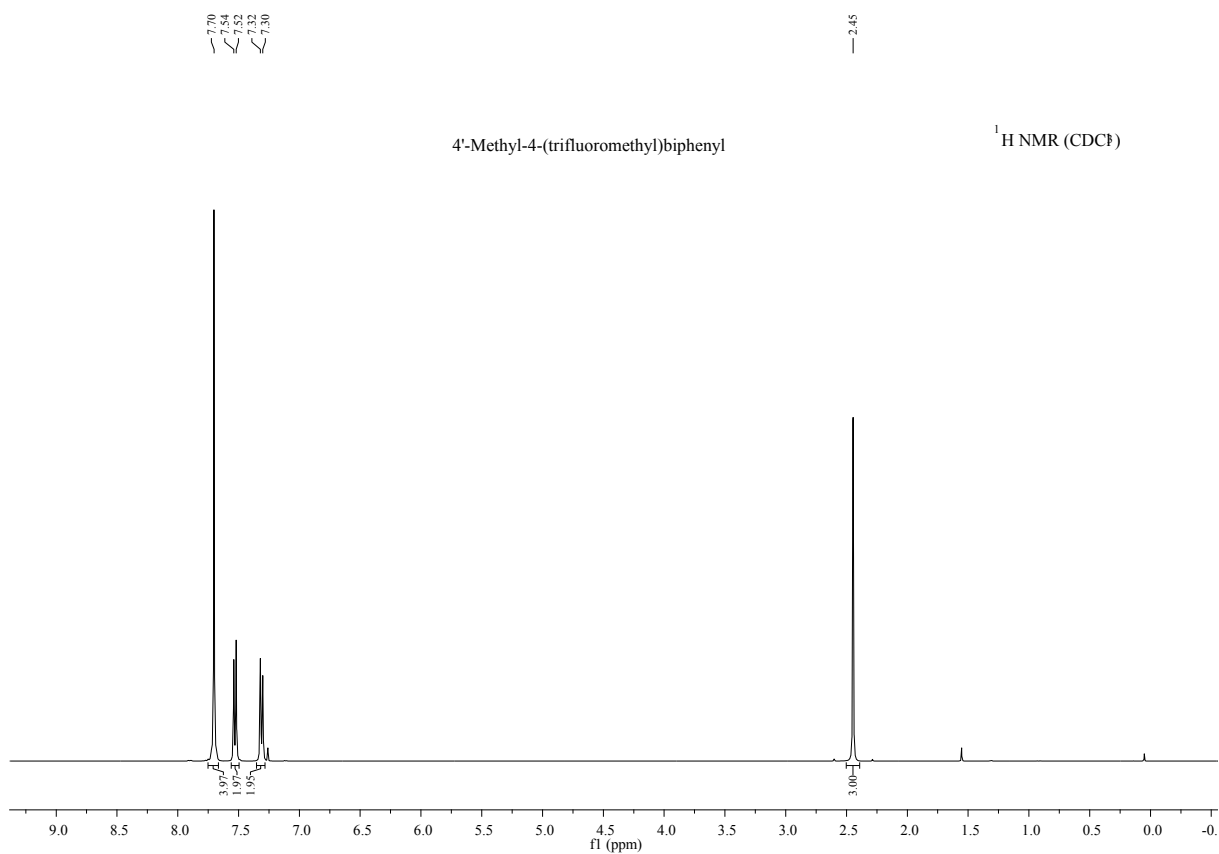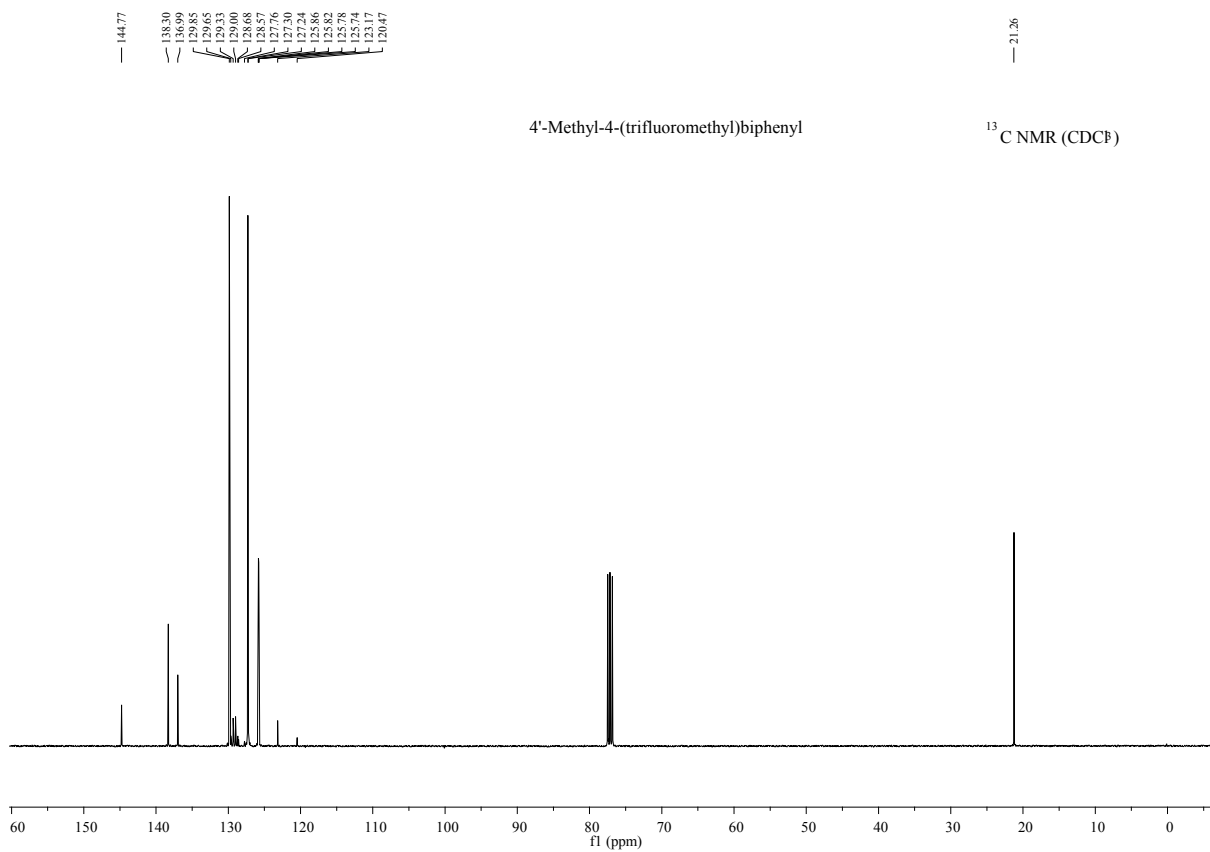



### 13. 2-p-Tolylpyridine

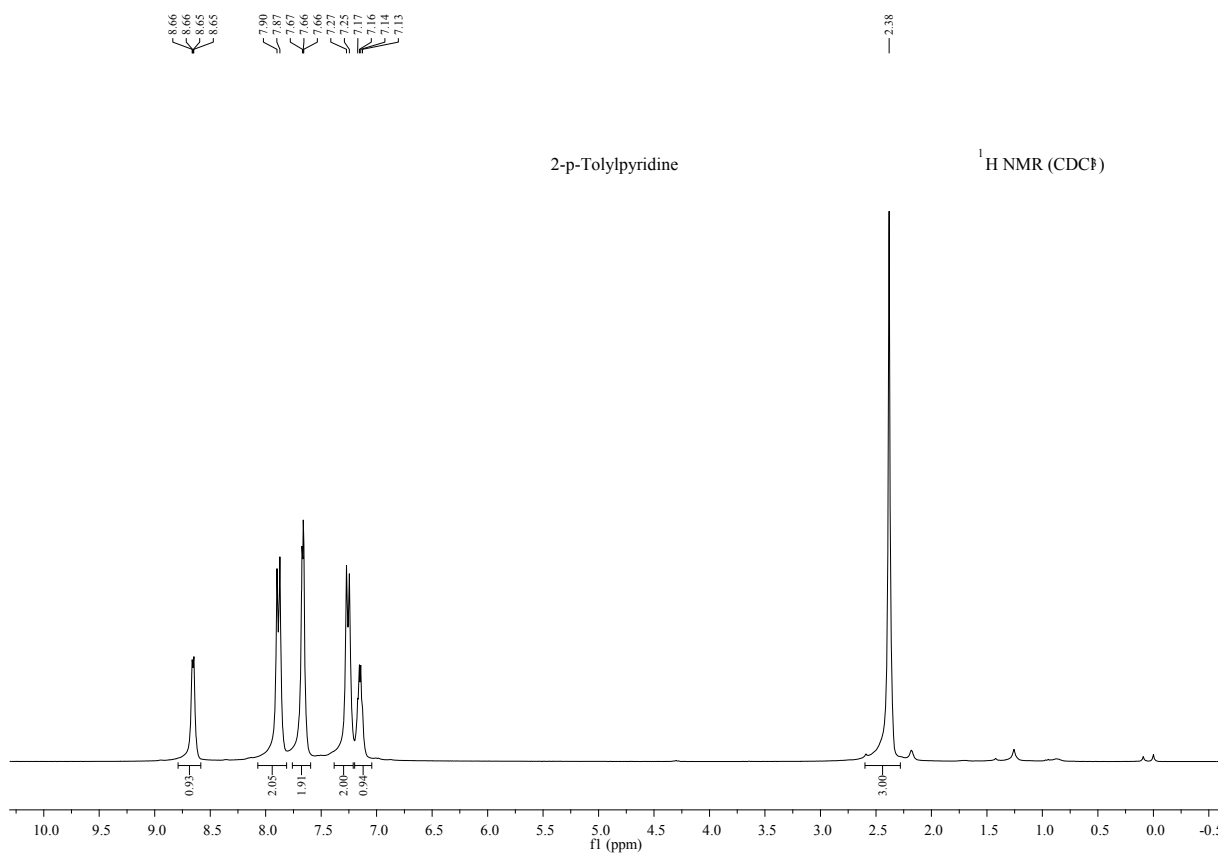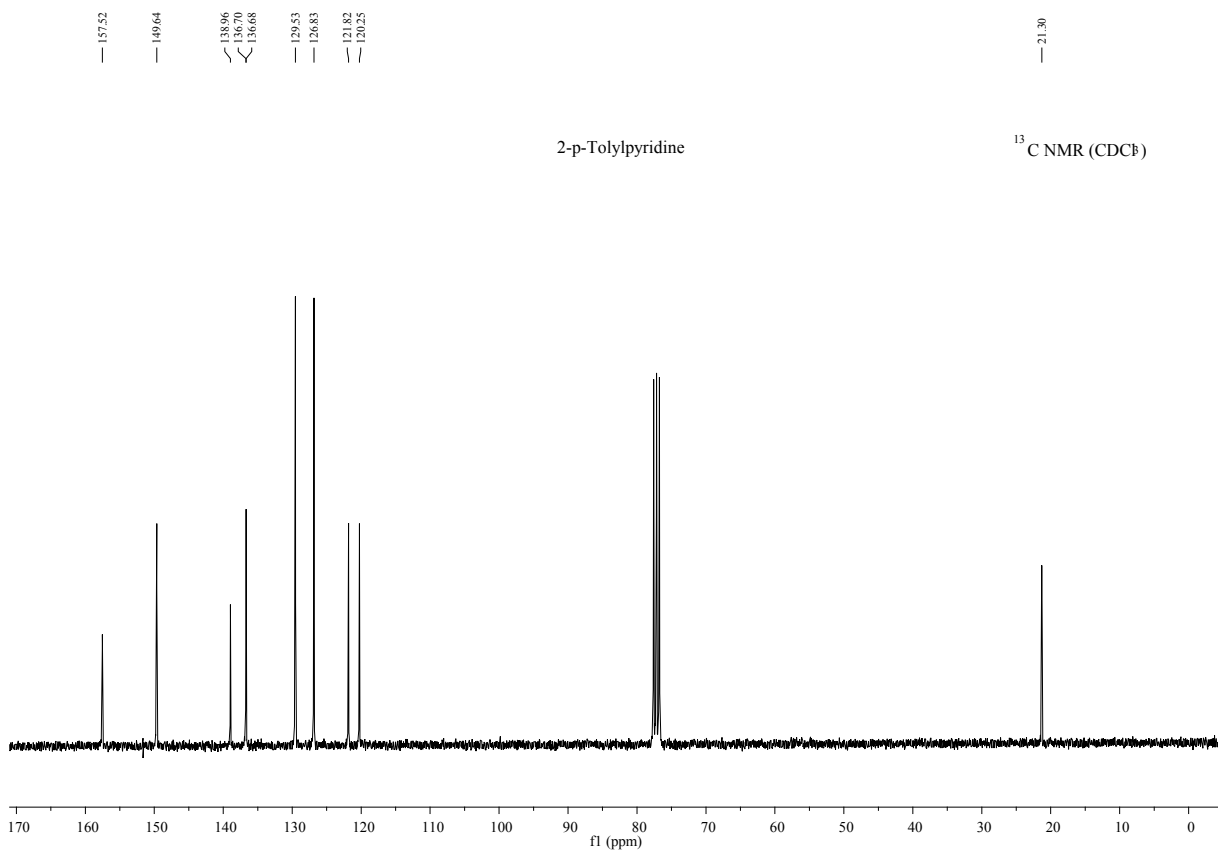

# 14. 2-(4-Methoxy-phenyl)pyridine

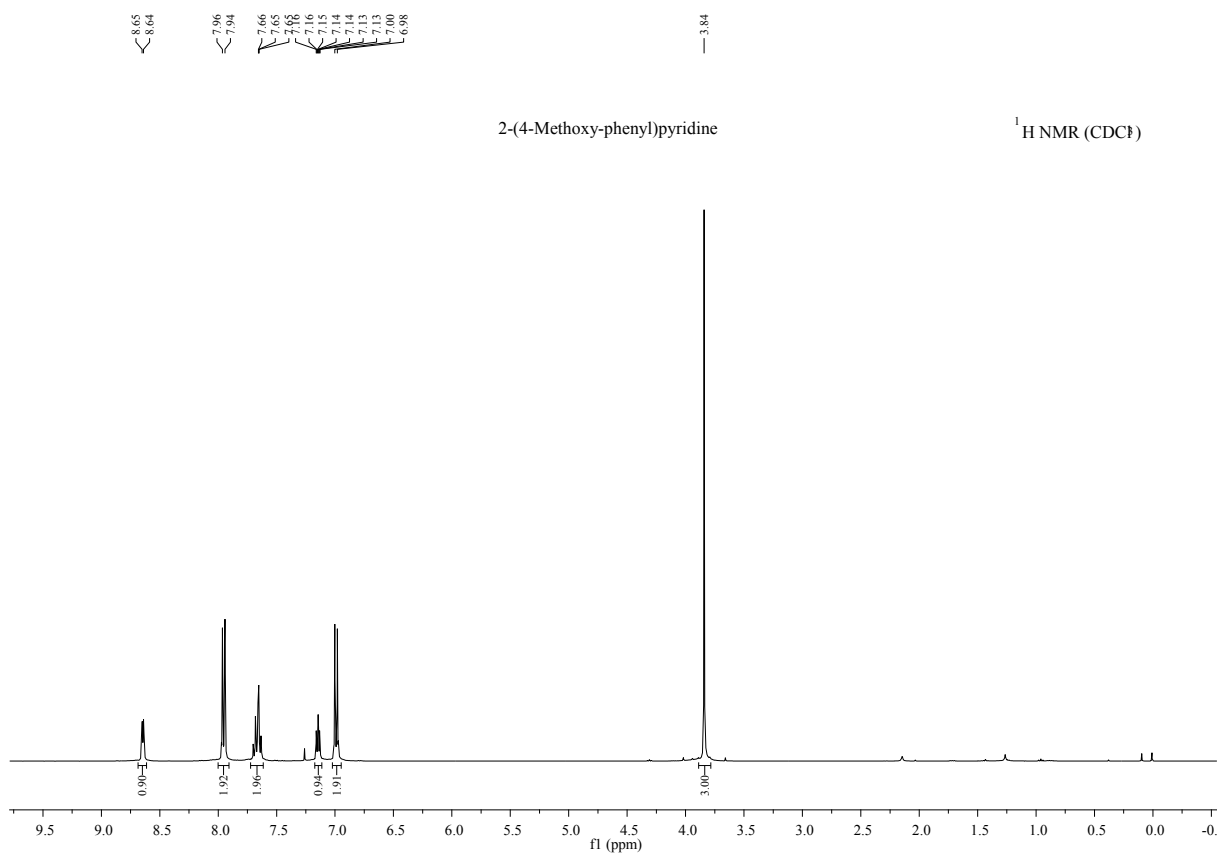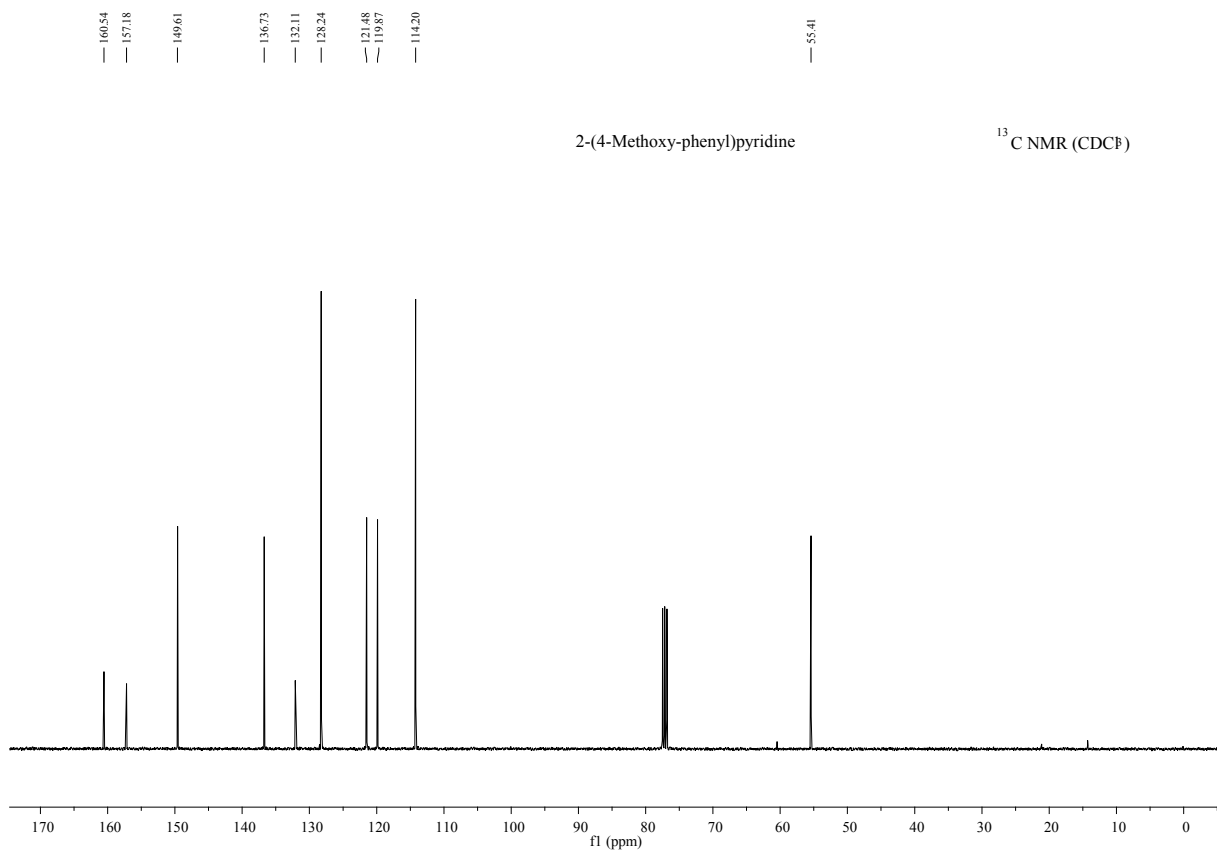

# 15. *N,N*-dimethyl-(4-pyridin-2-yl)benzenamine

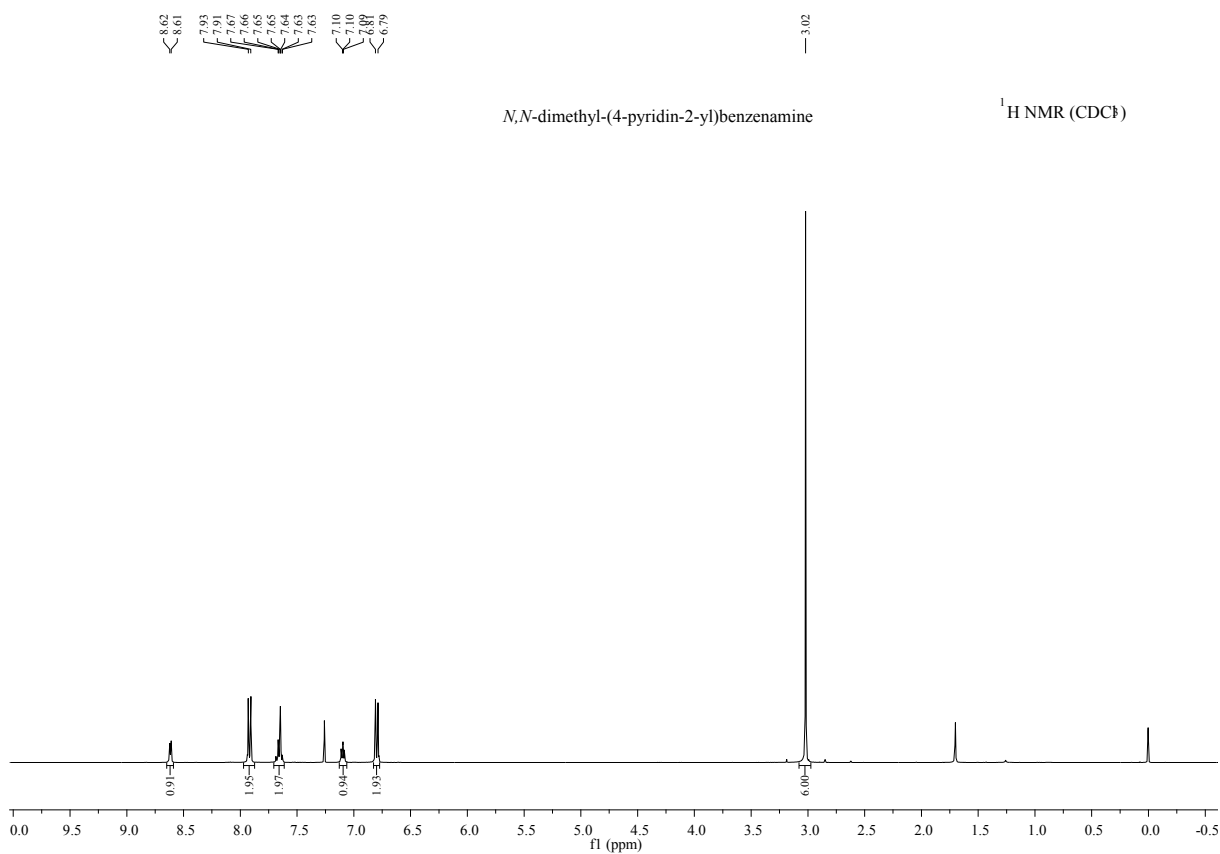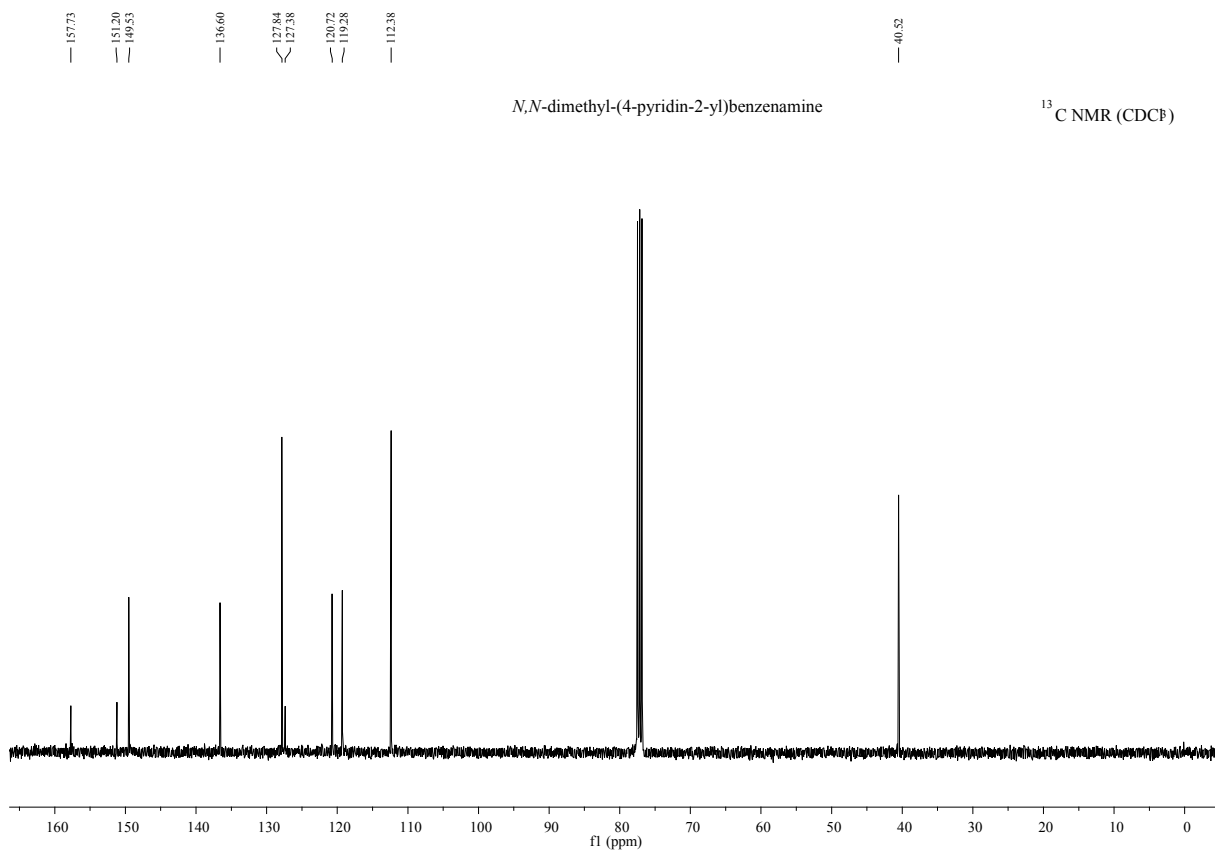

# 16. 4-Methyl-2-*p*-tolylpyridine

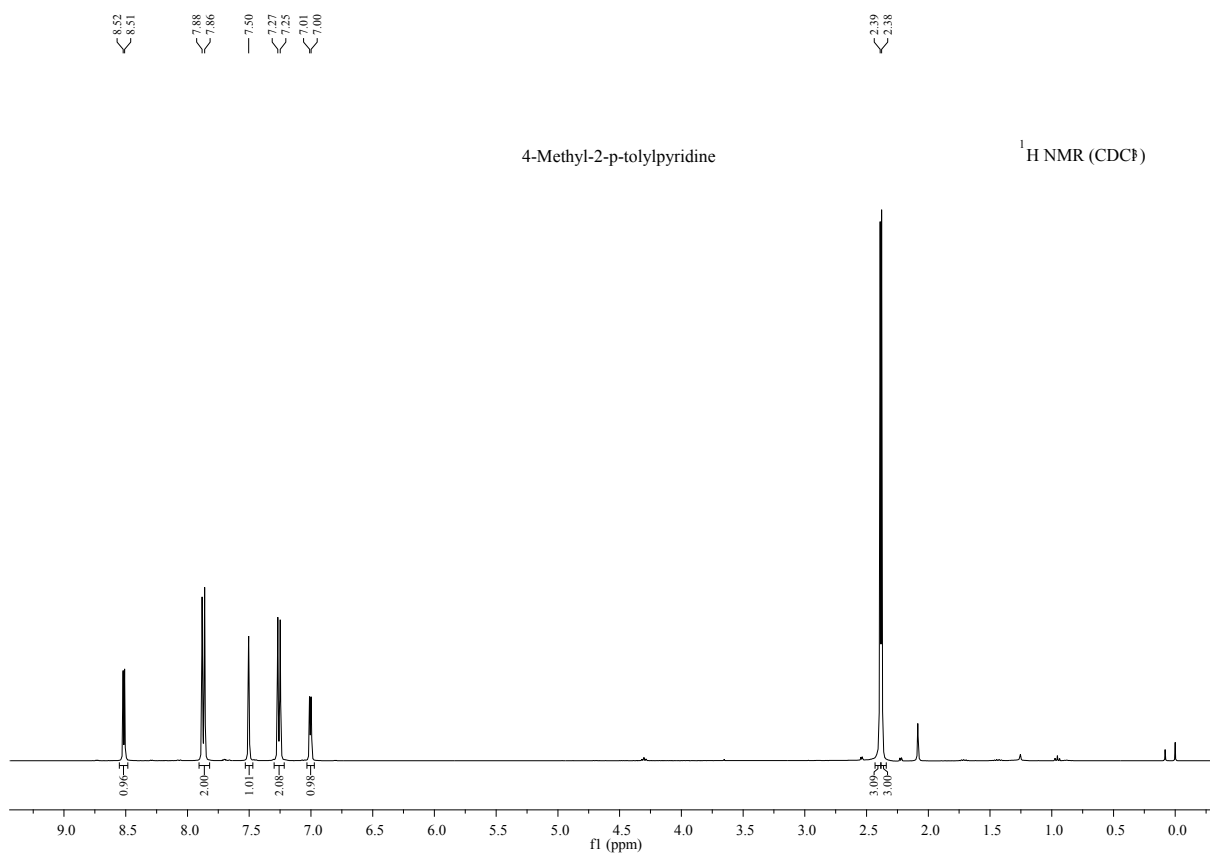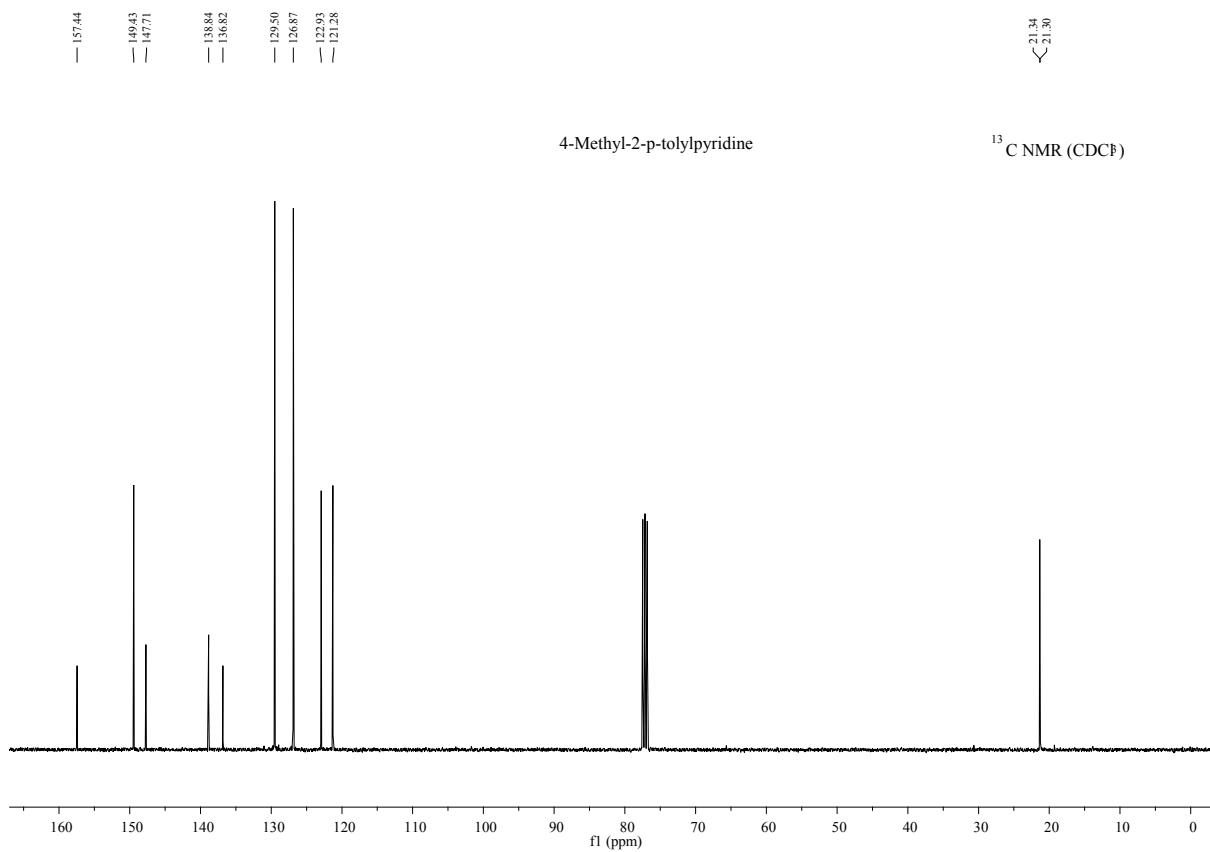

# 17. 3-*p*-Tolylpyridine

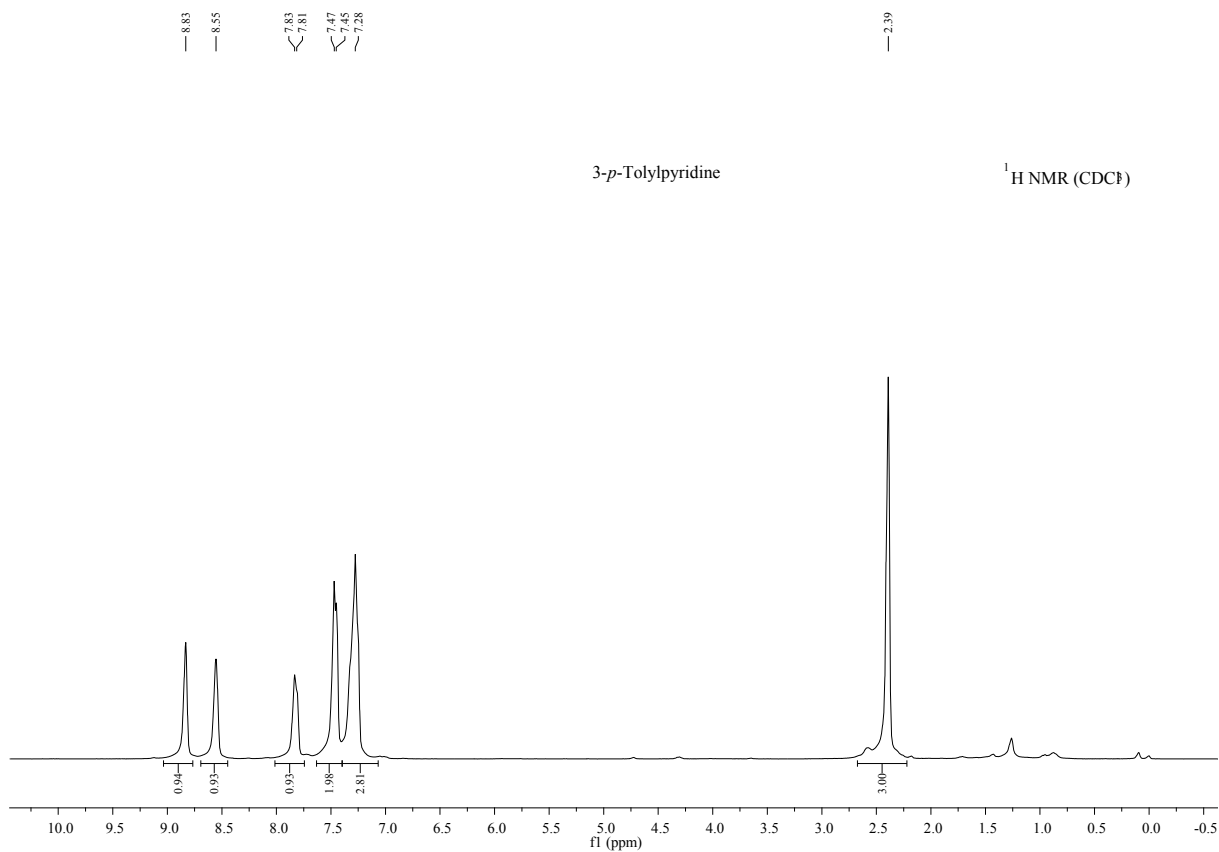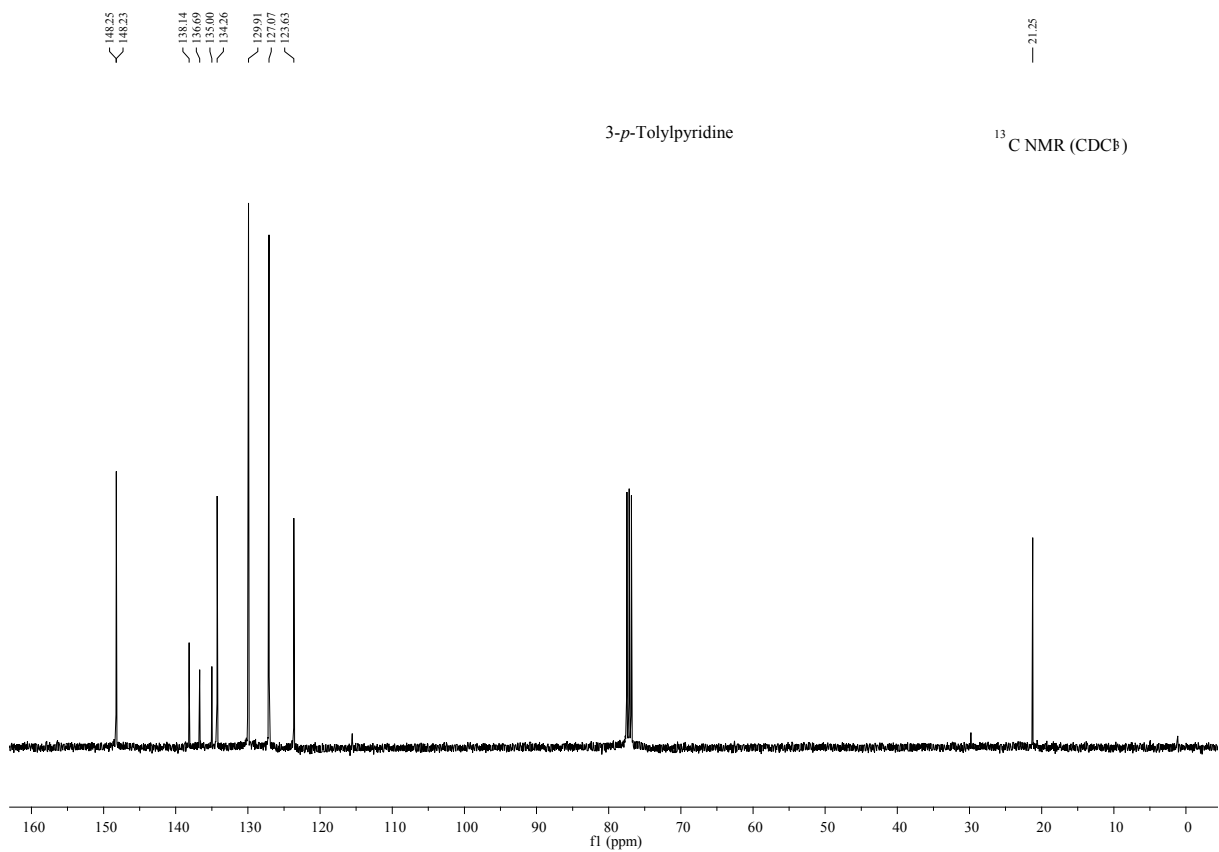

# 18. 1,4-Di(*p*-methylphenyl)benzene

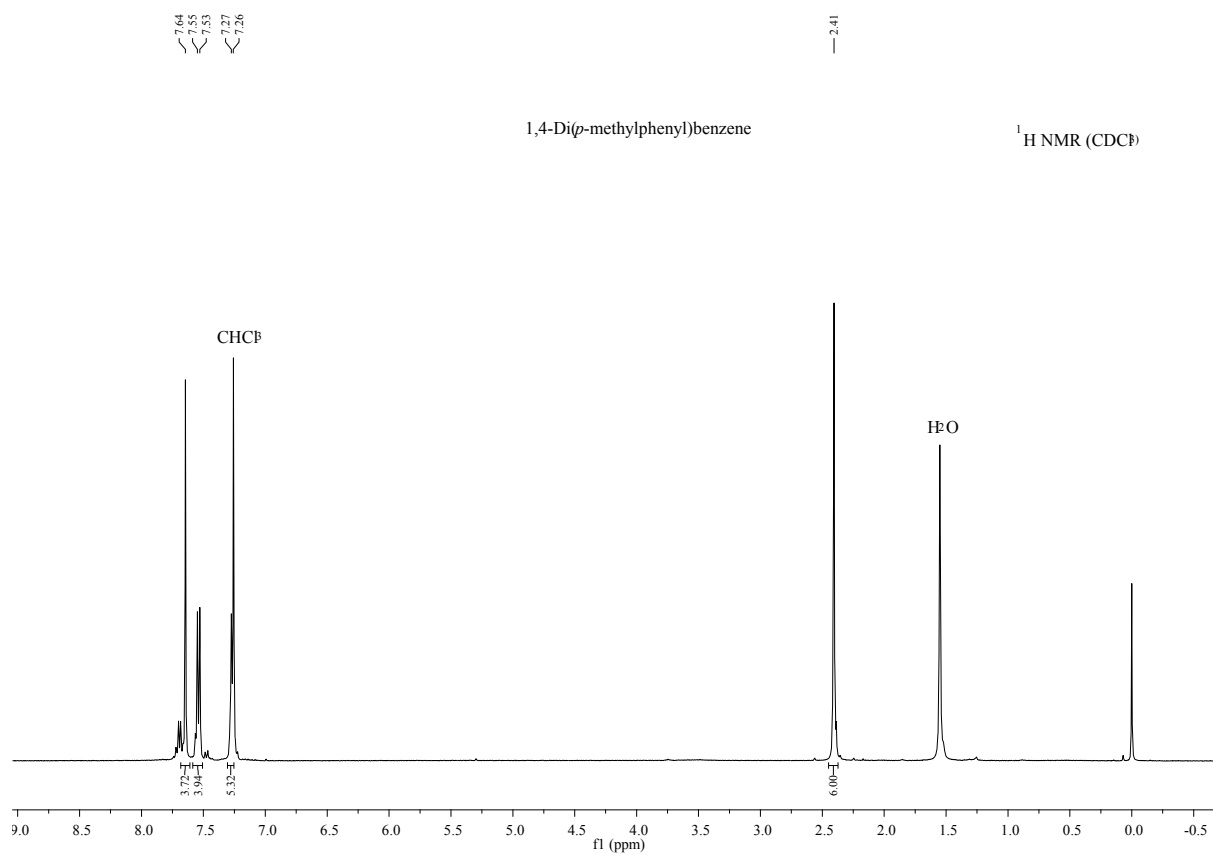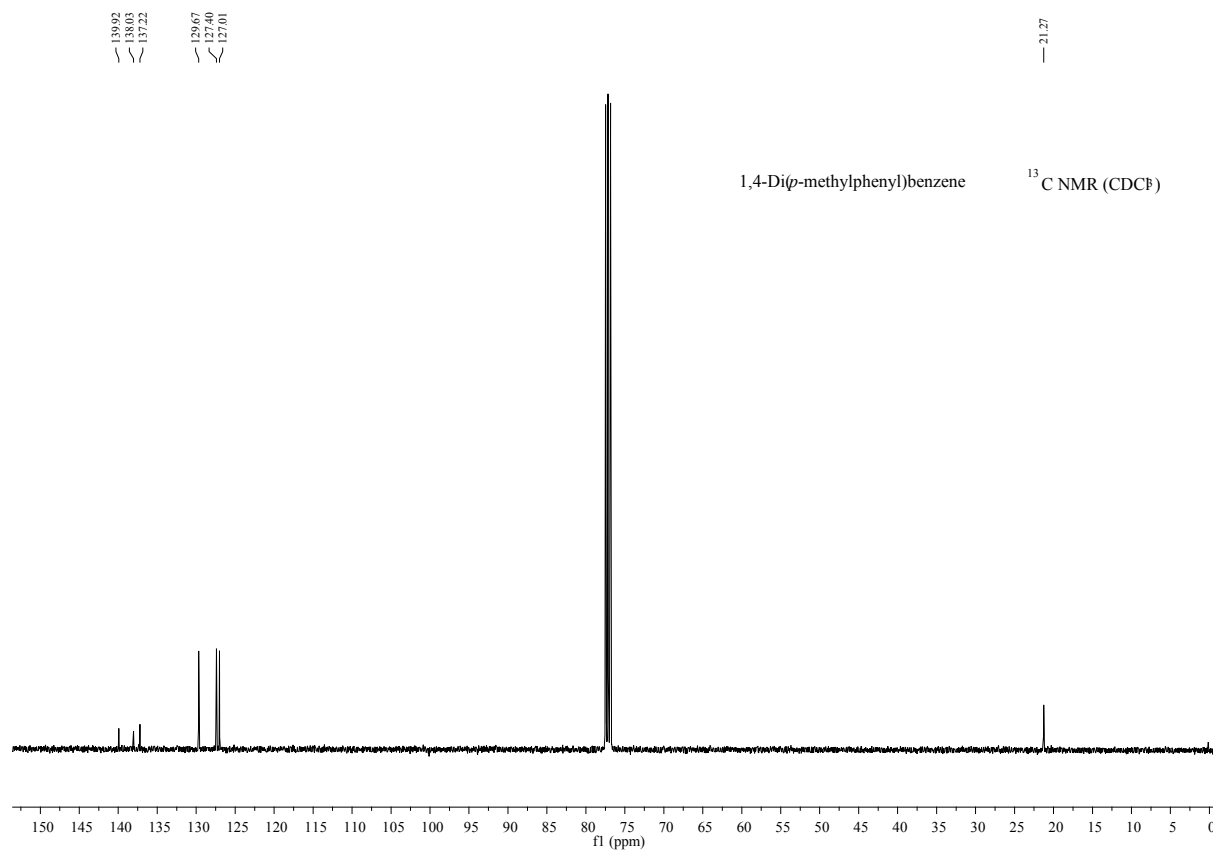

# 19. 1,3,5-tris(*p*-methylphenyl)benzene

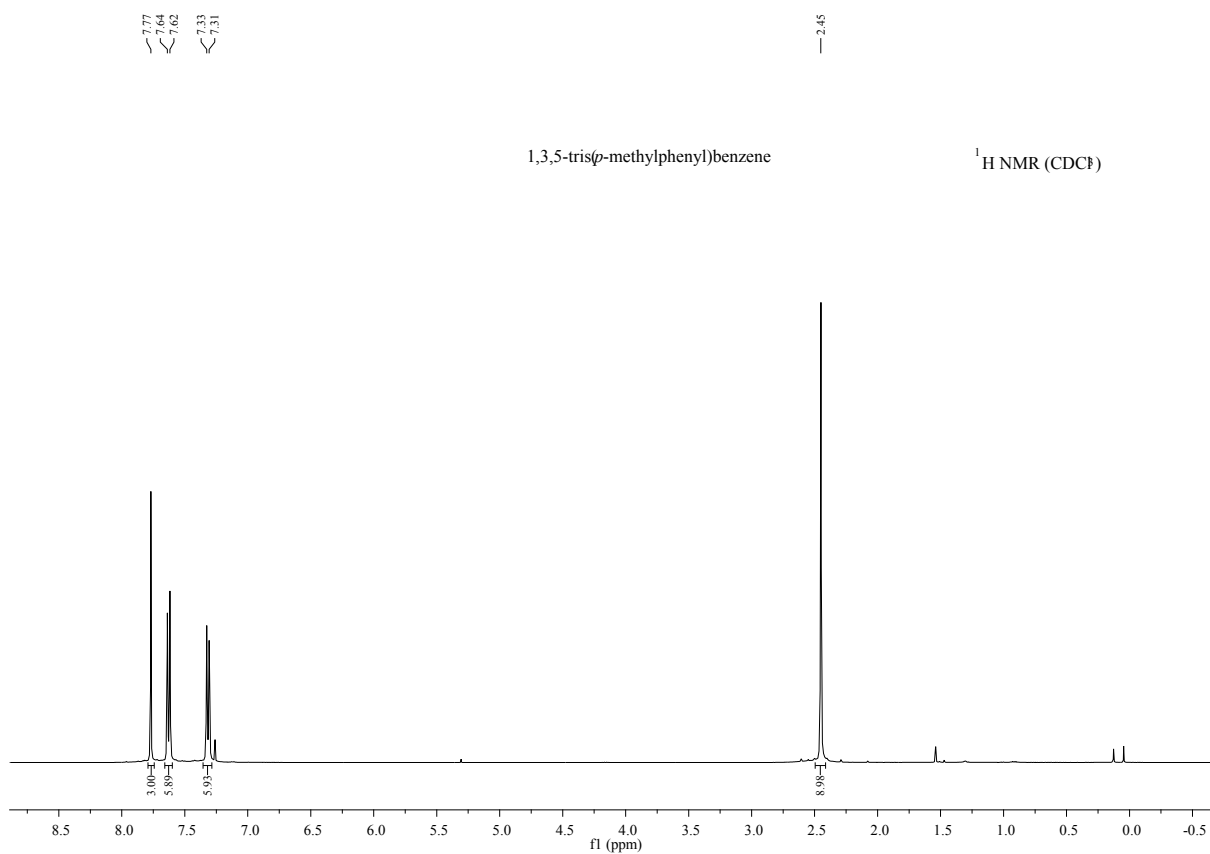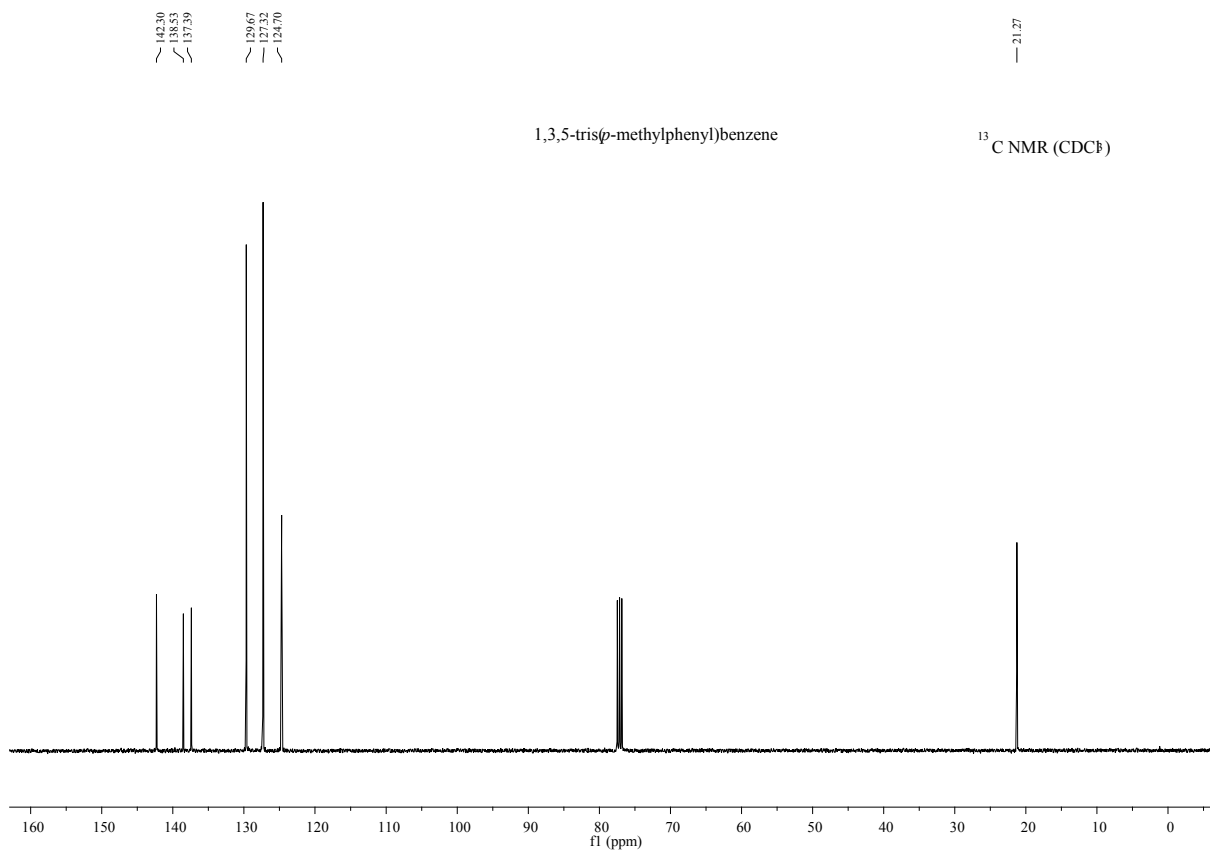

## 20. 1-Methoxy-2-(*p*-toyl)benzoate

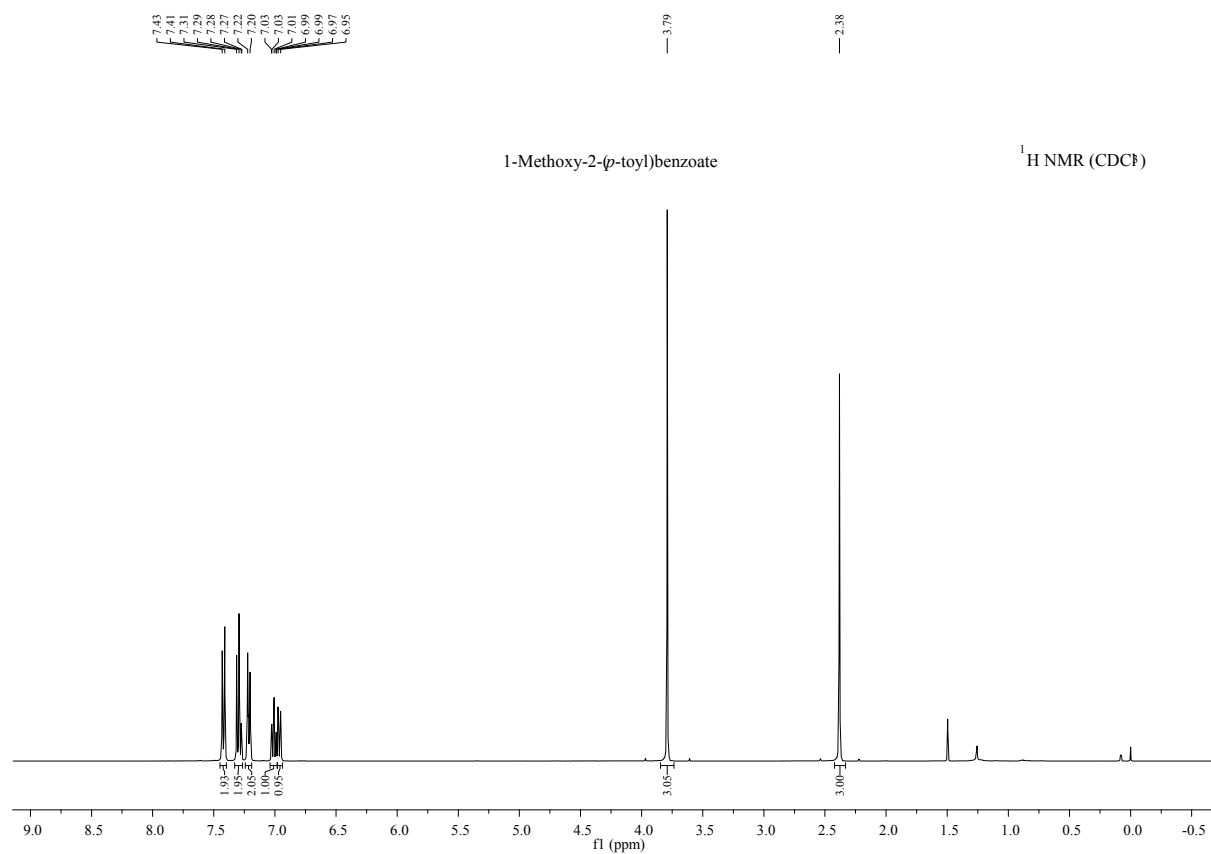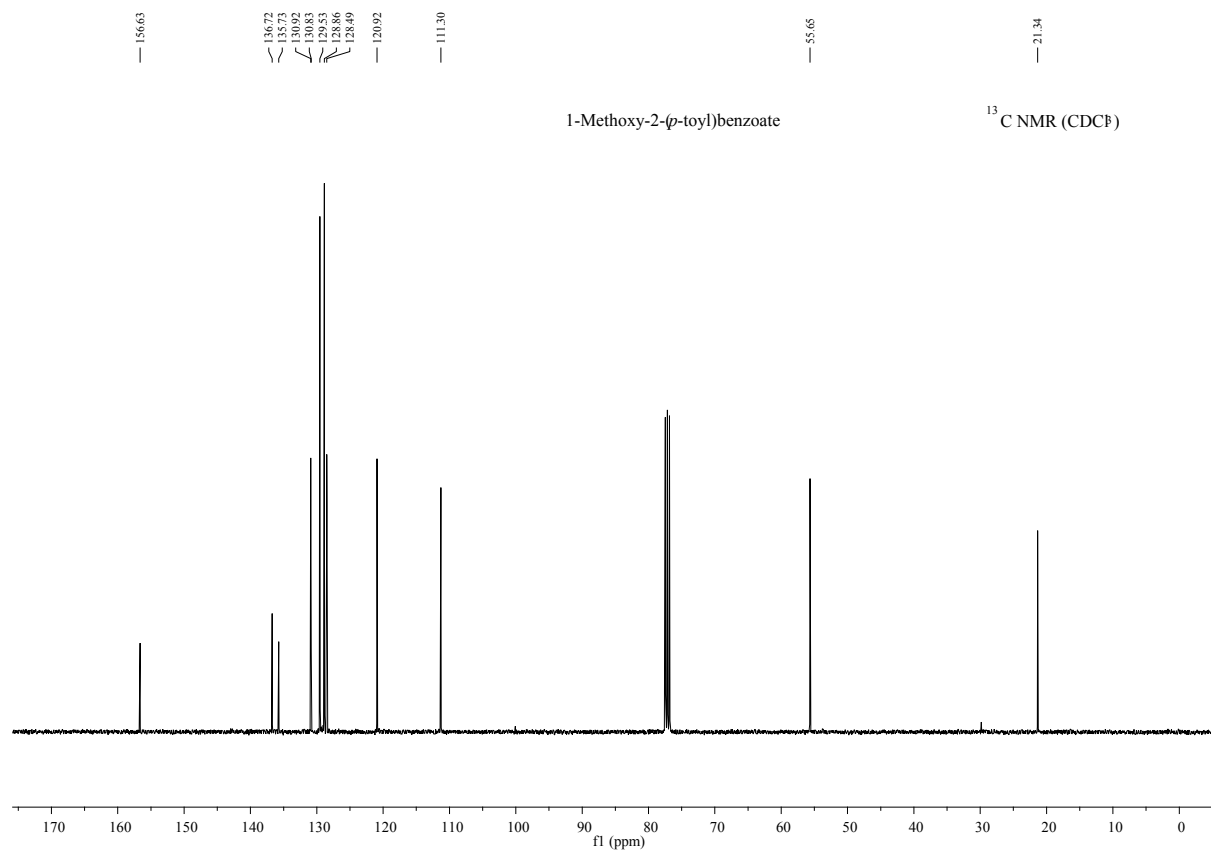



## 21. *N,N,2',5'*-tetramethylbiphenyl-4-amine

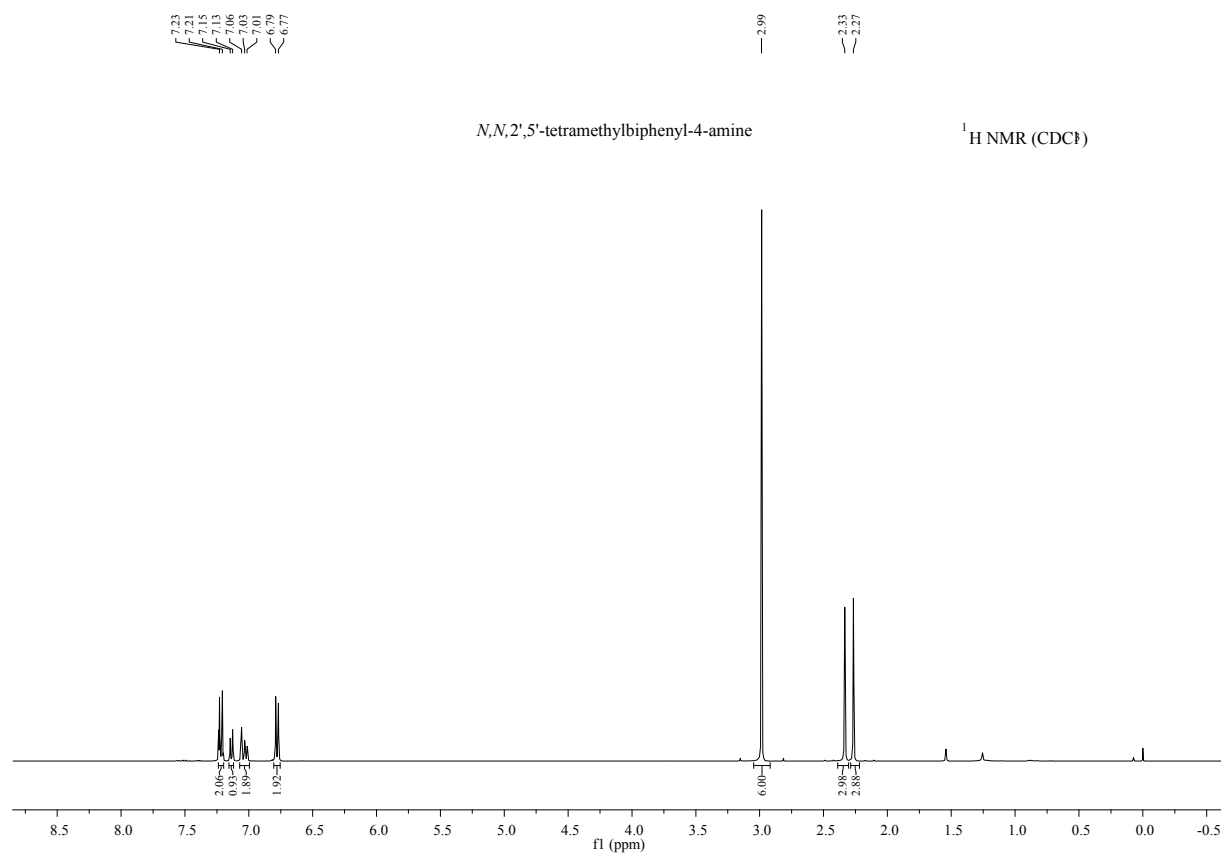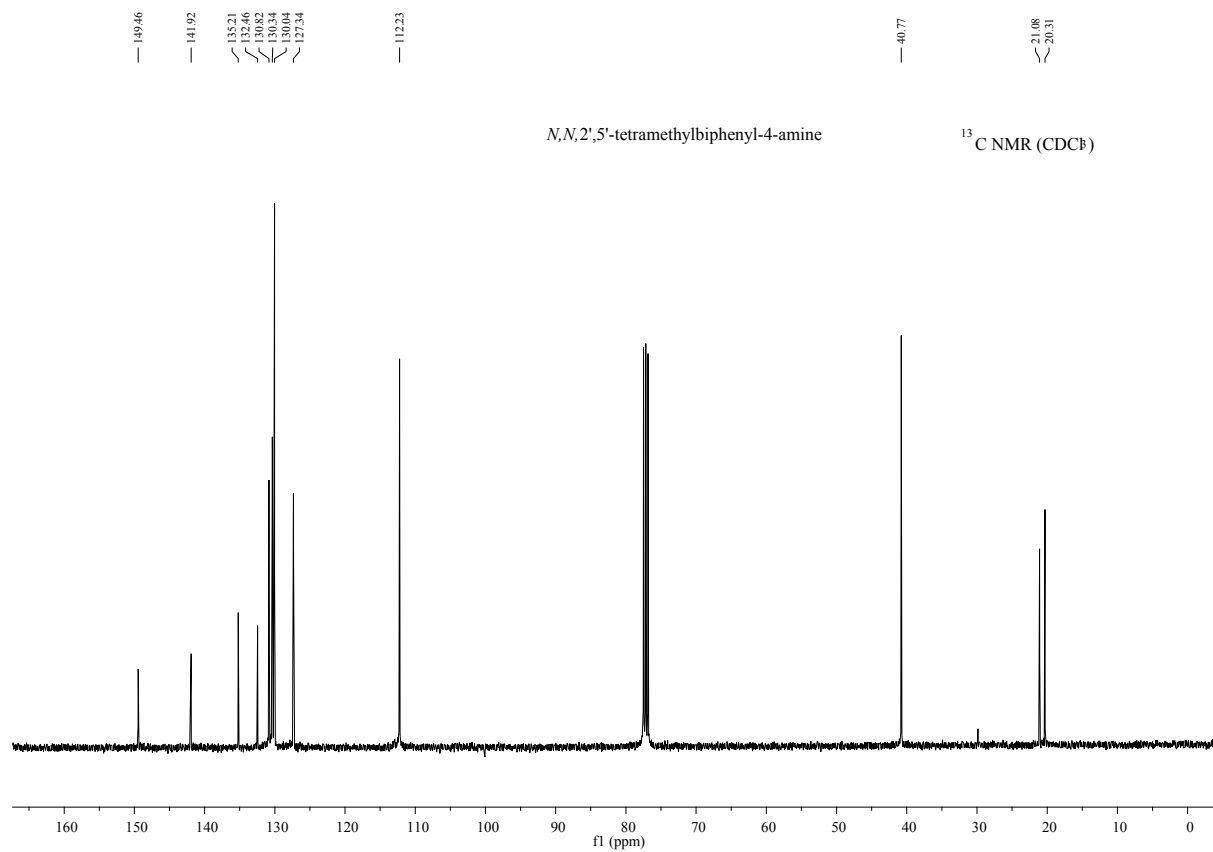

## 22. 4-Methoxybiphenyl

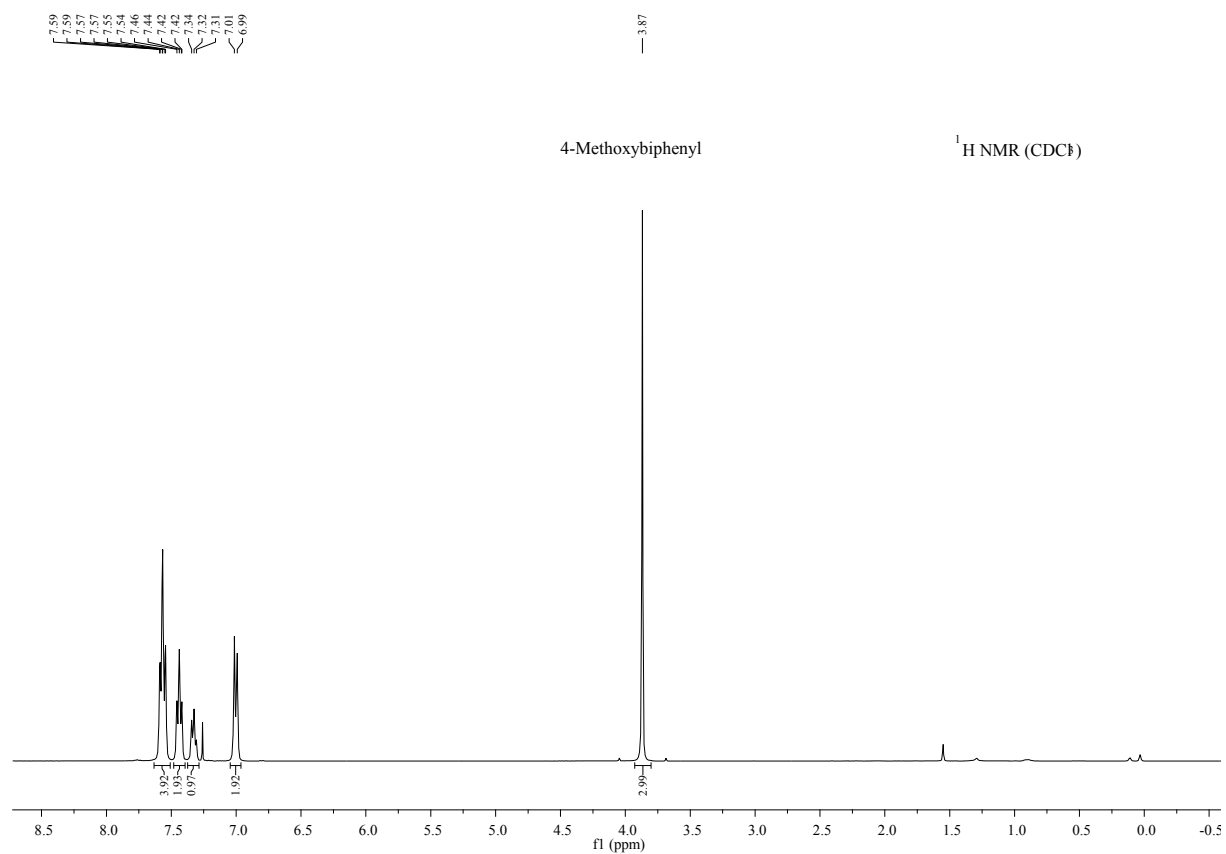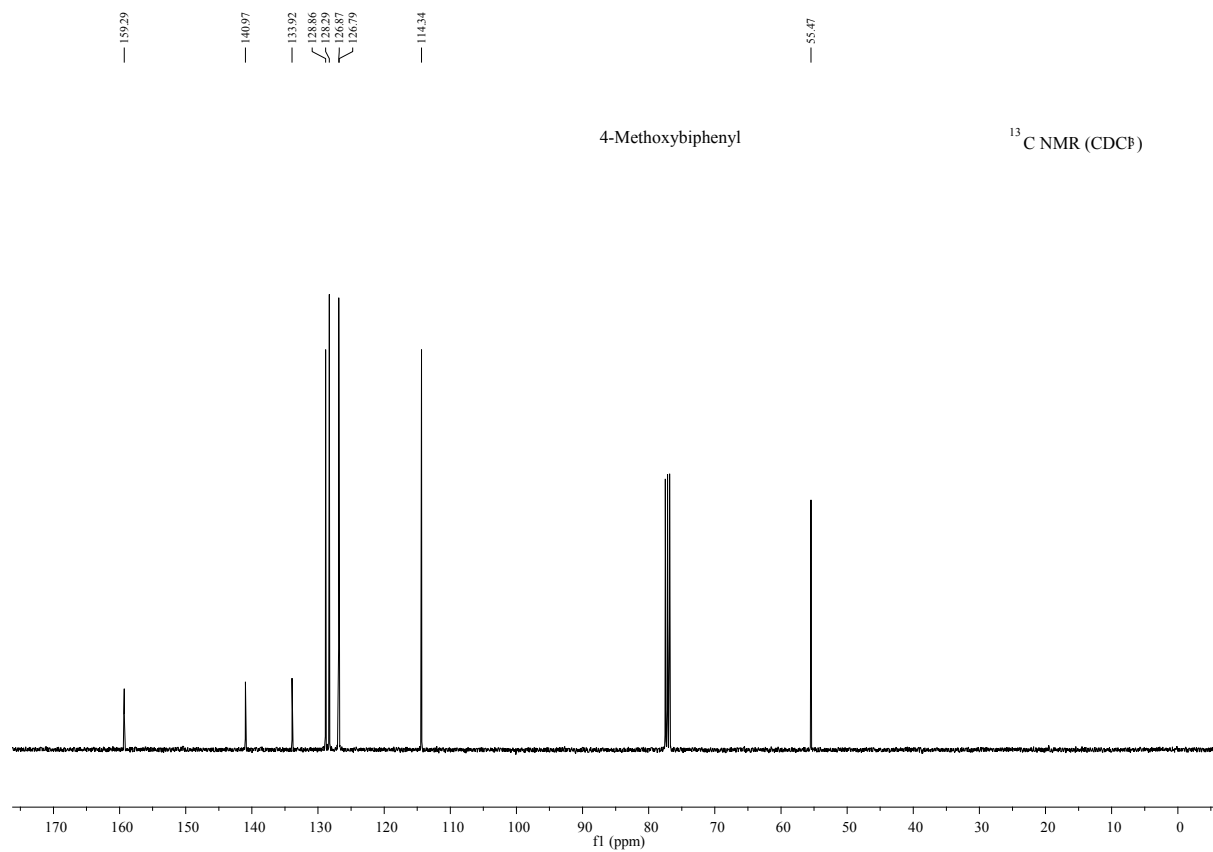

### 23. 4'-Methoxy-4-(trifluoromethyl)biphenyl

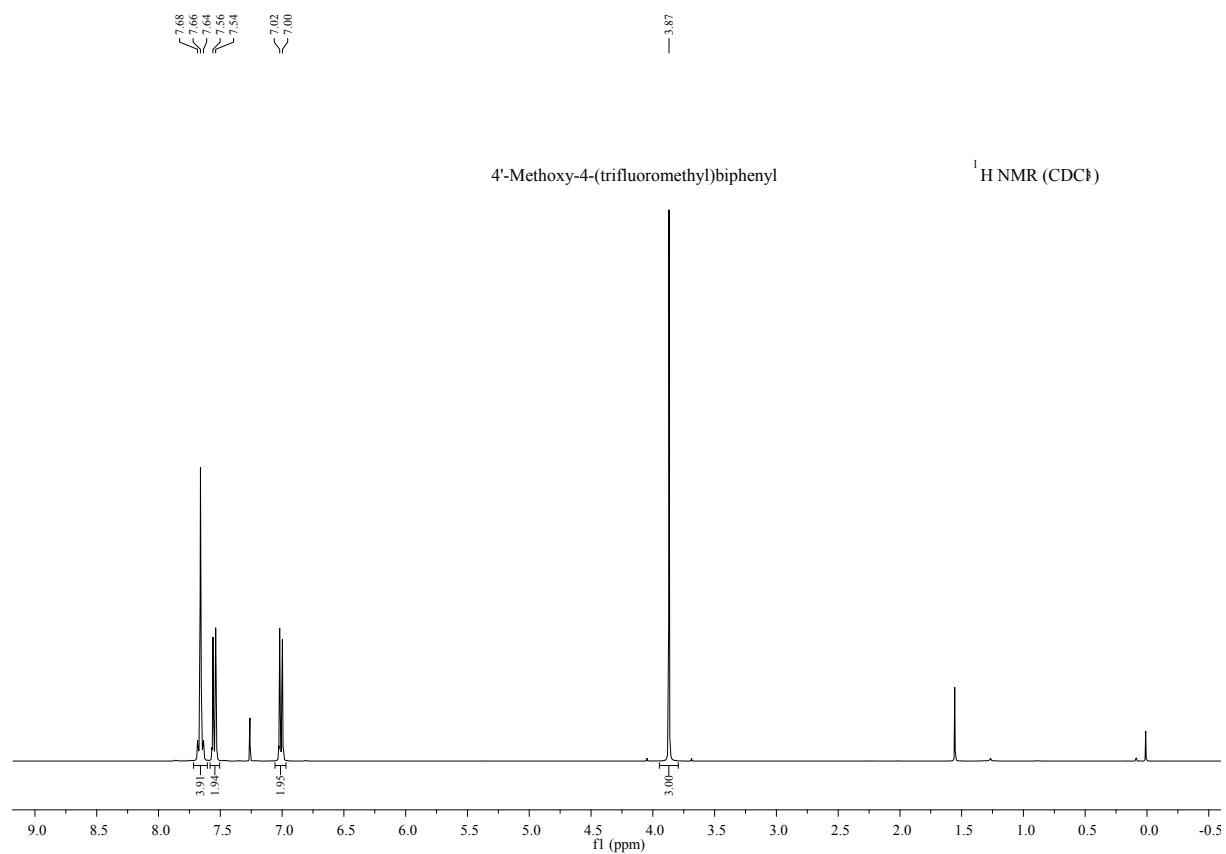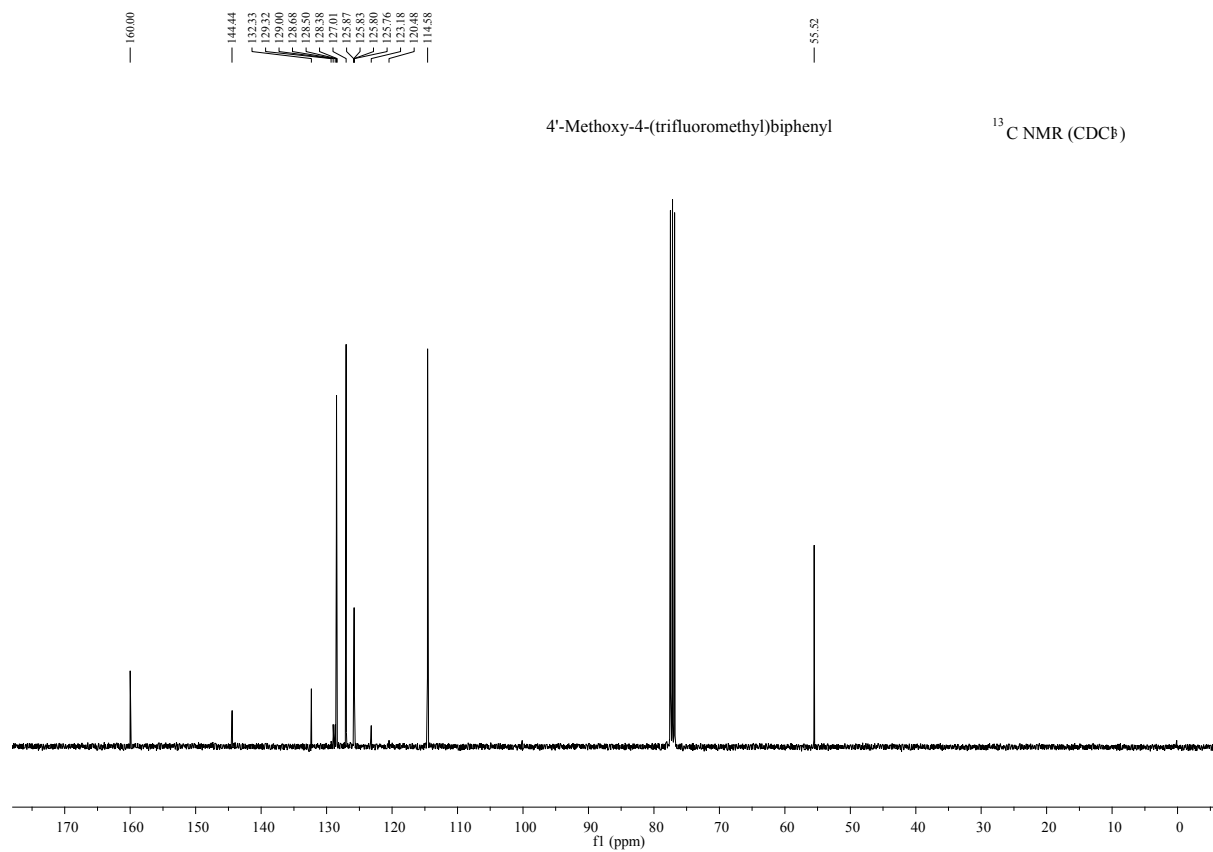

## 24. Dimethyl-(4'-trifluoromethylbiphenyl-4-yl)amine

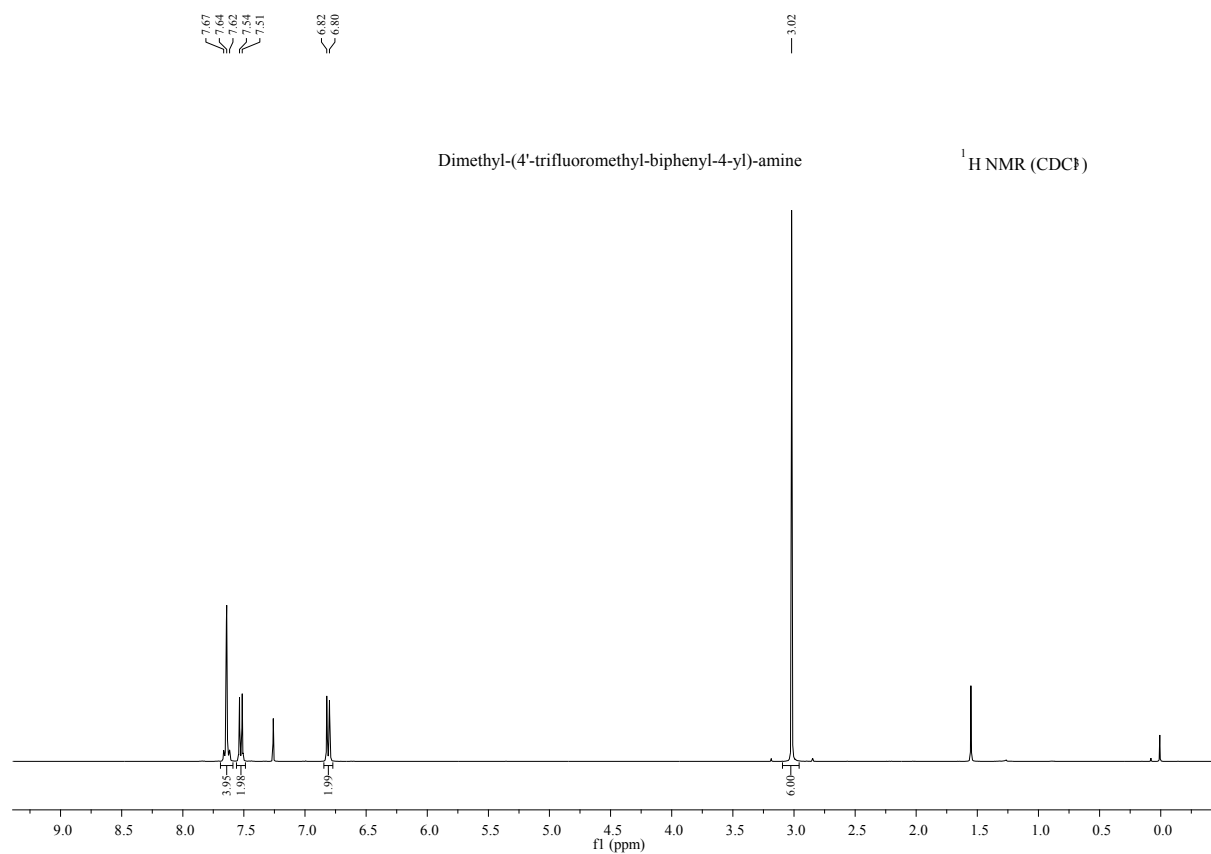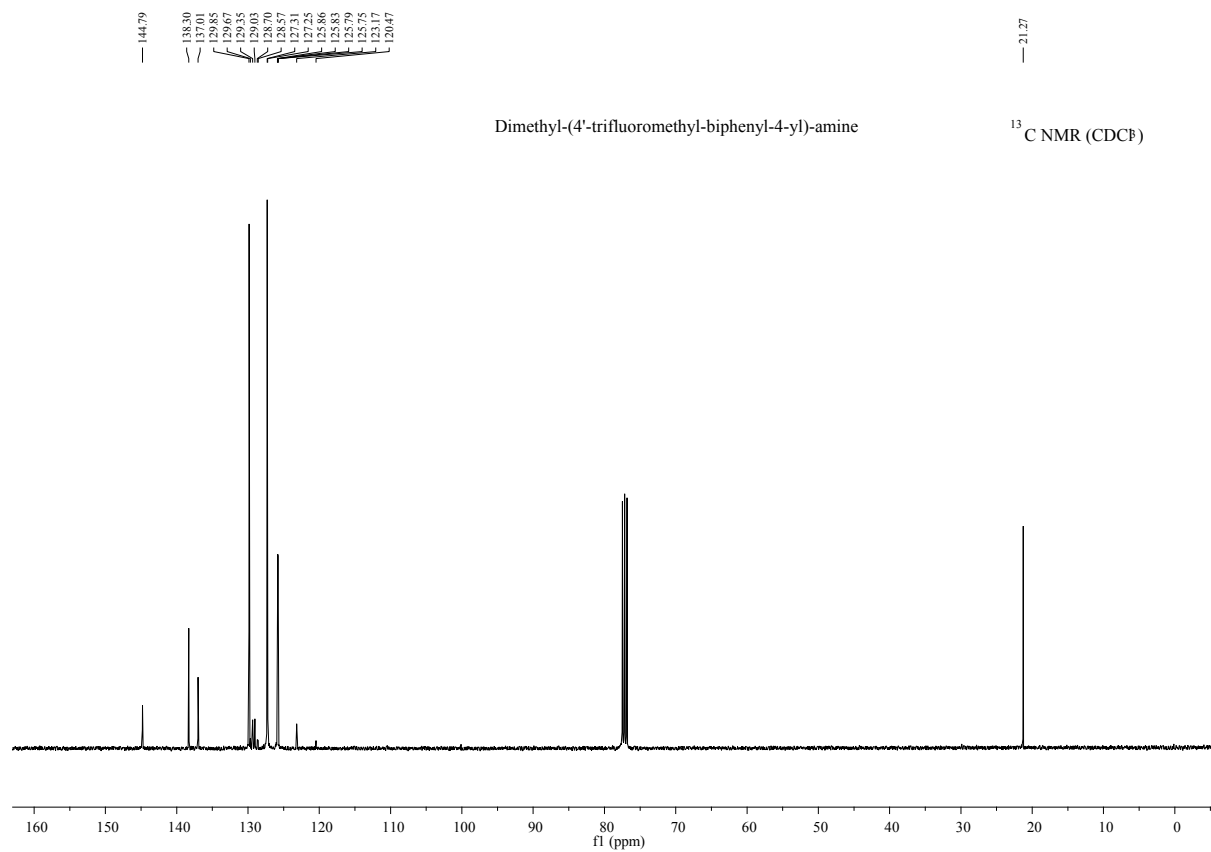

## 25. (4'-Methylbiphenyl-4-yl)(phenyl)methanone

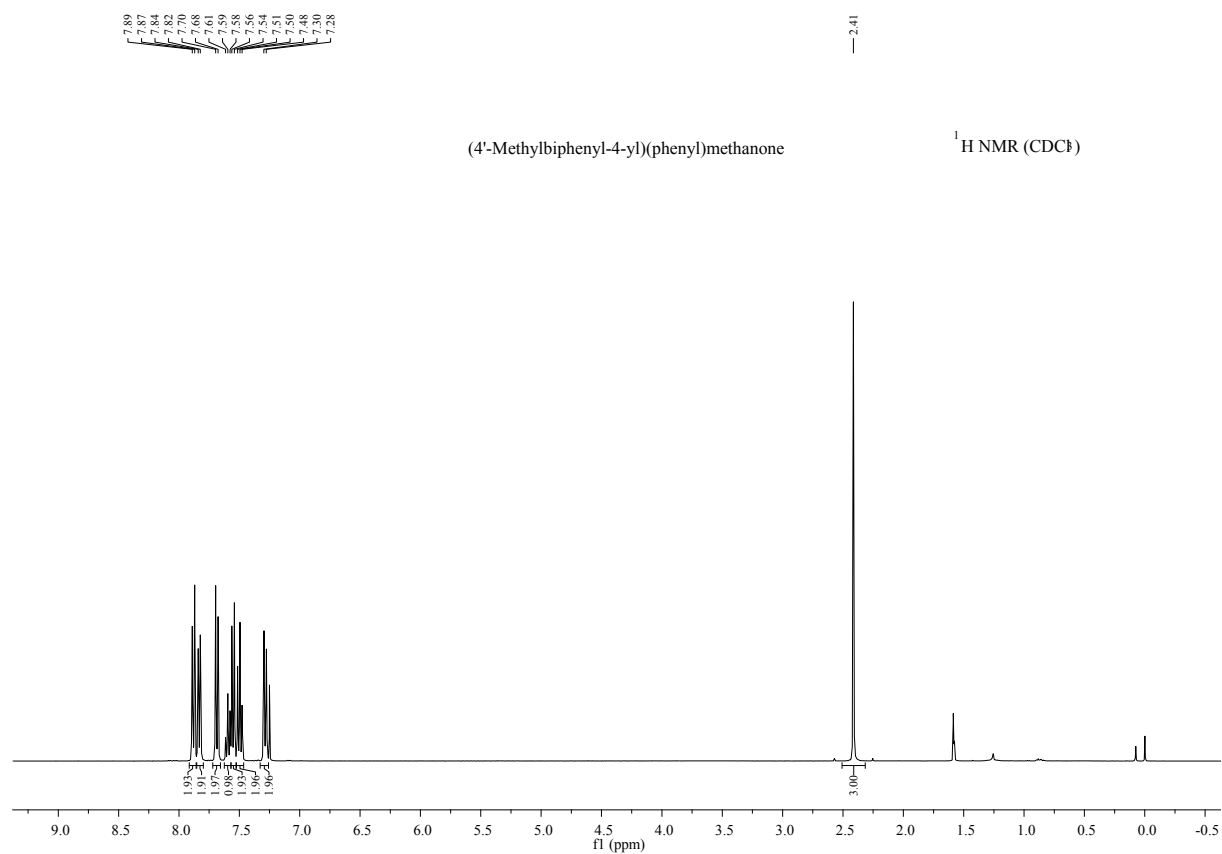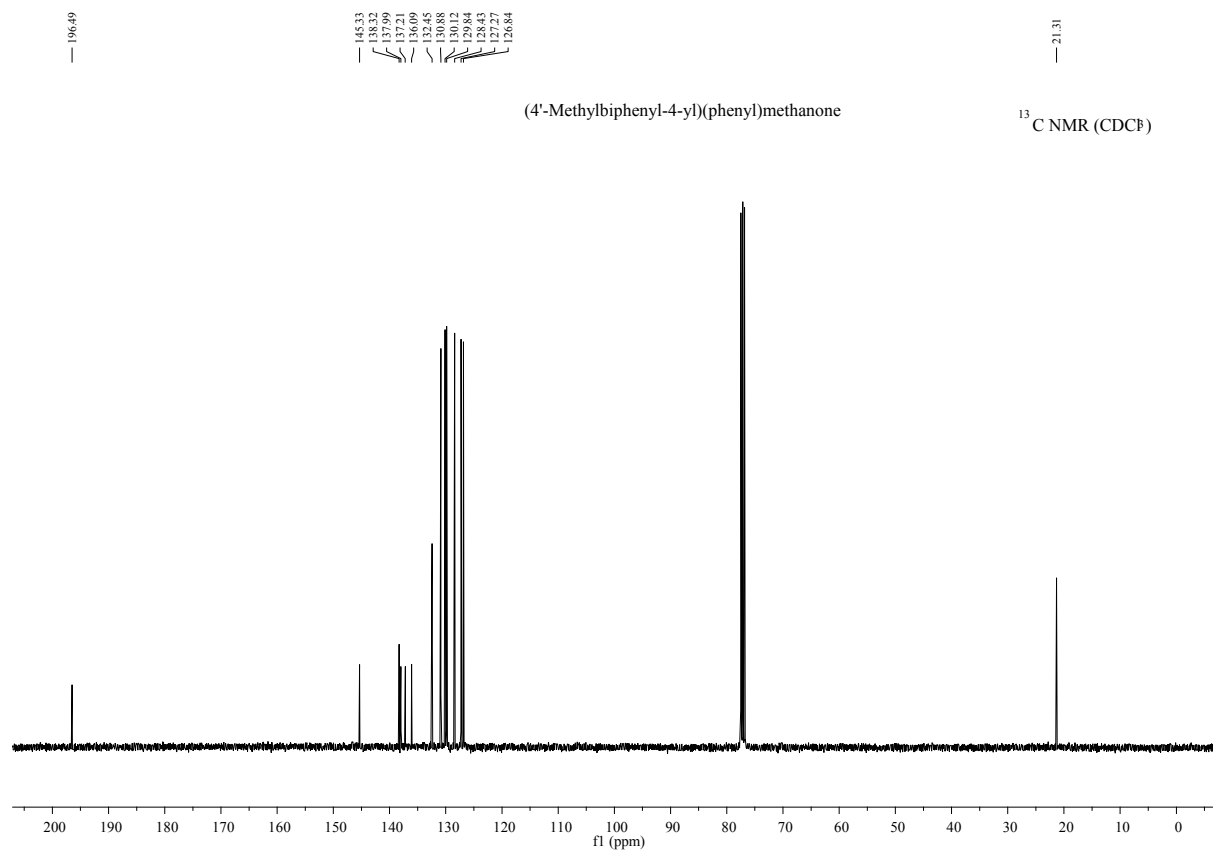

## 26. (4'-Methoxybiphenyl-4-yl)(phenyl)methanone

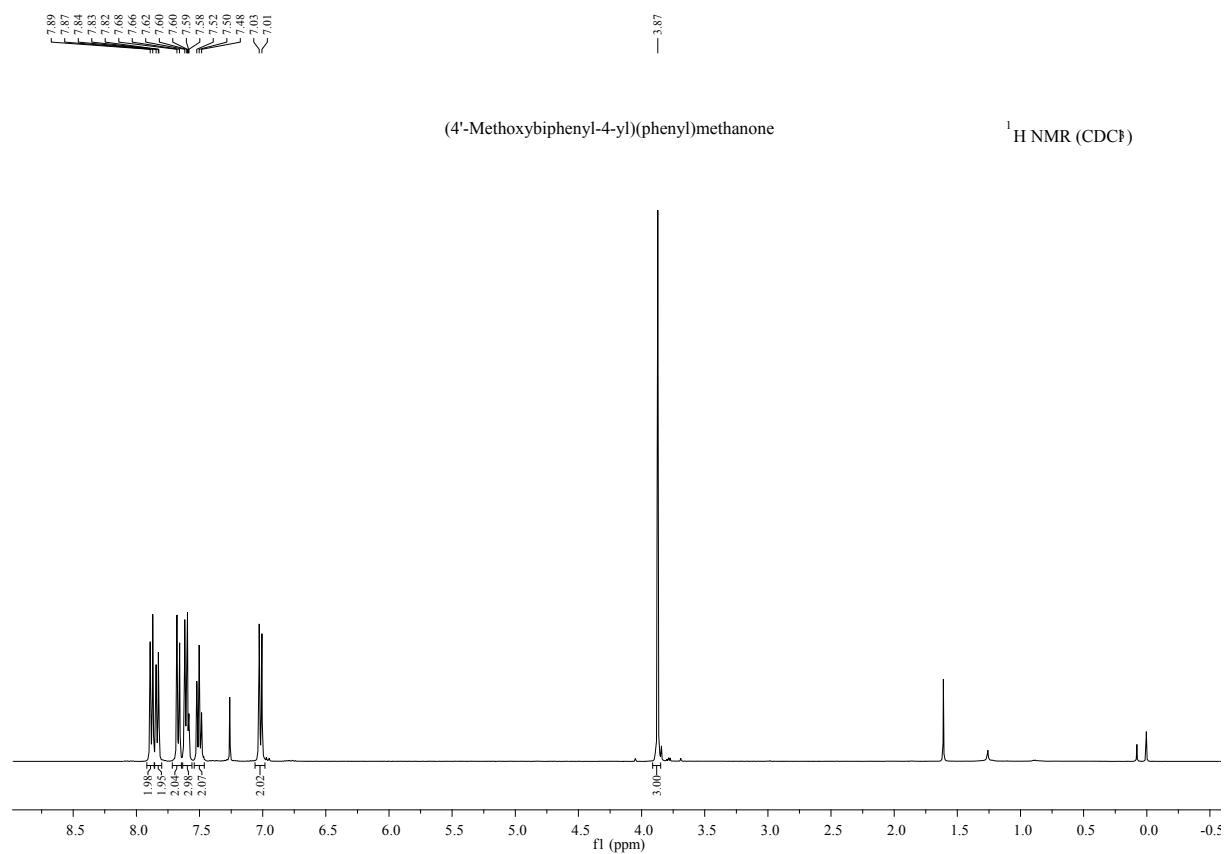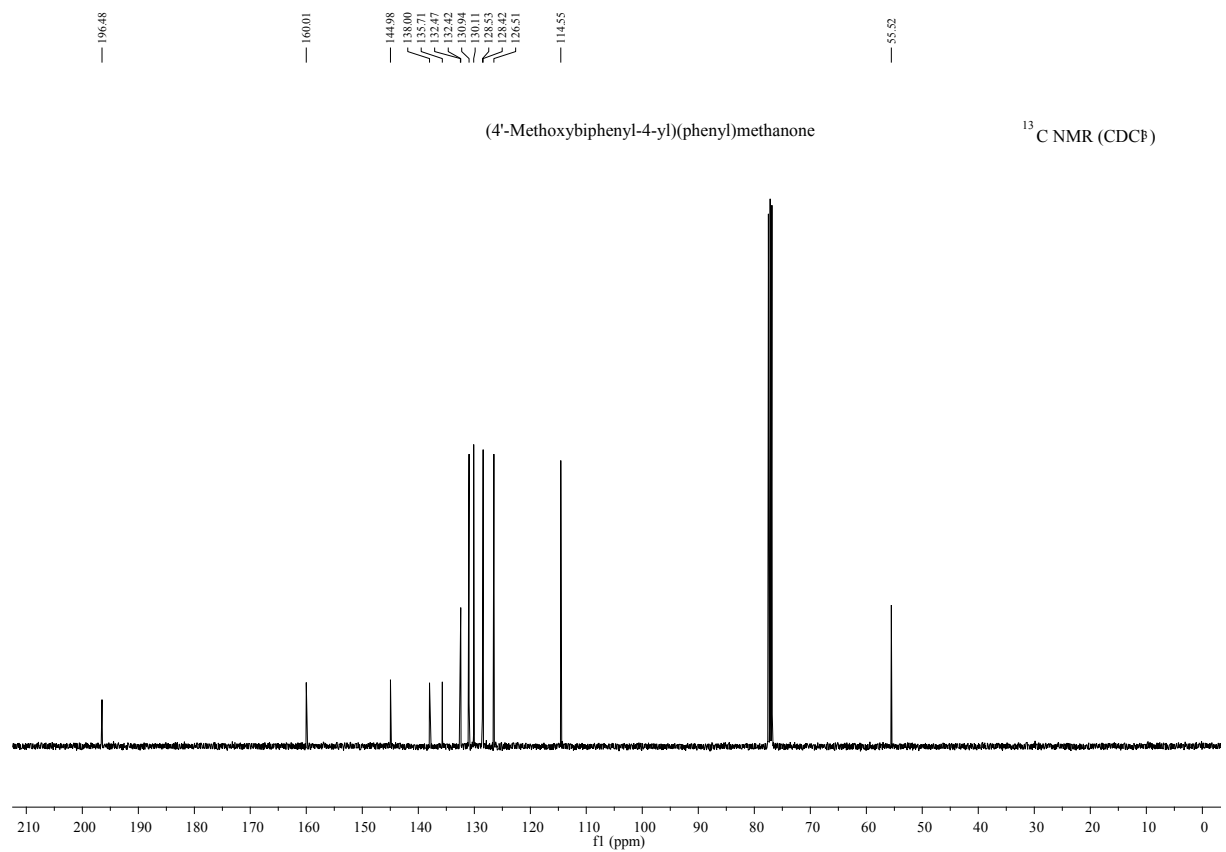

## 27. Ethyl 4'-methylbiphenyl-4-carboxylate

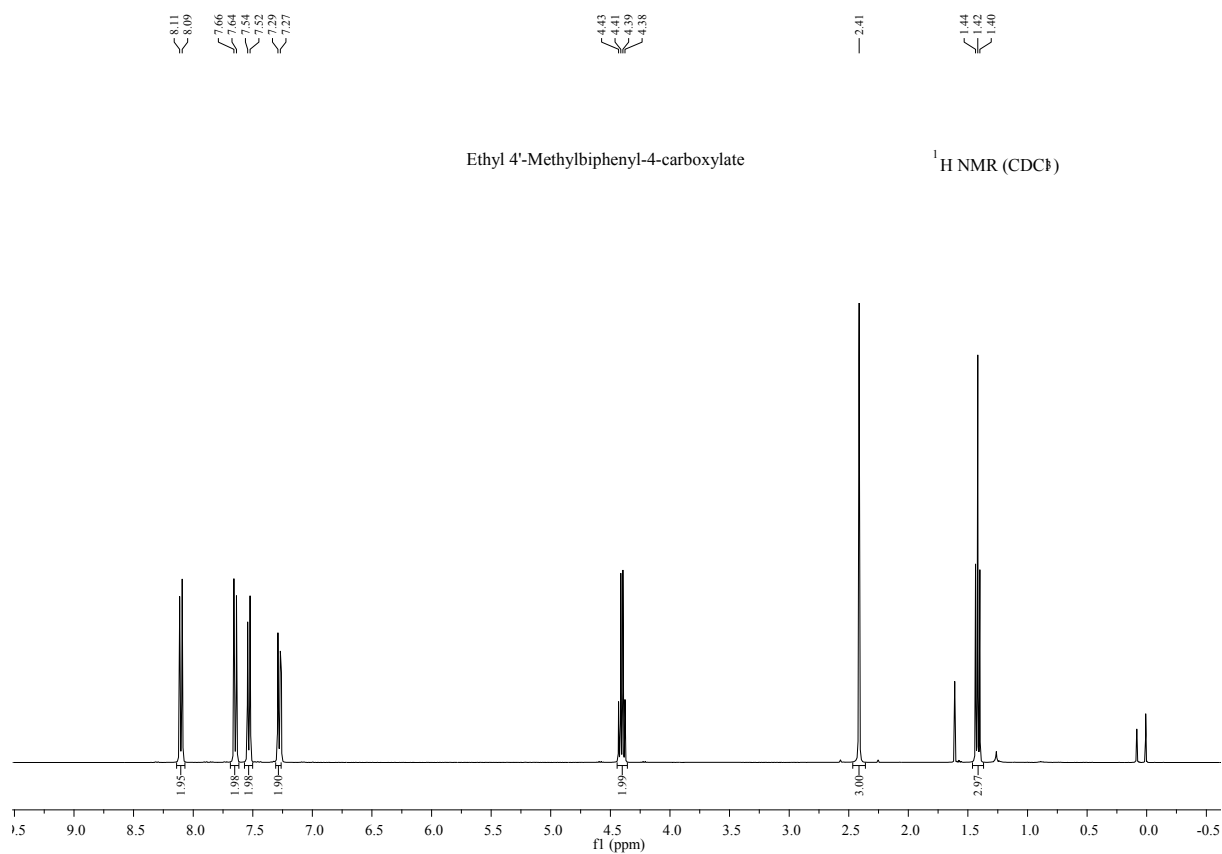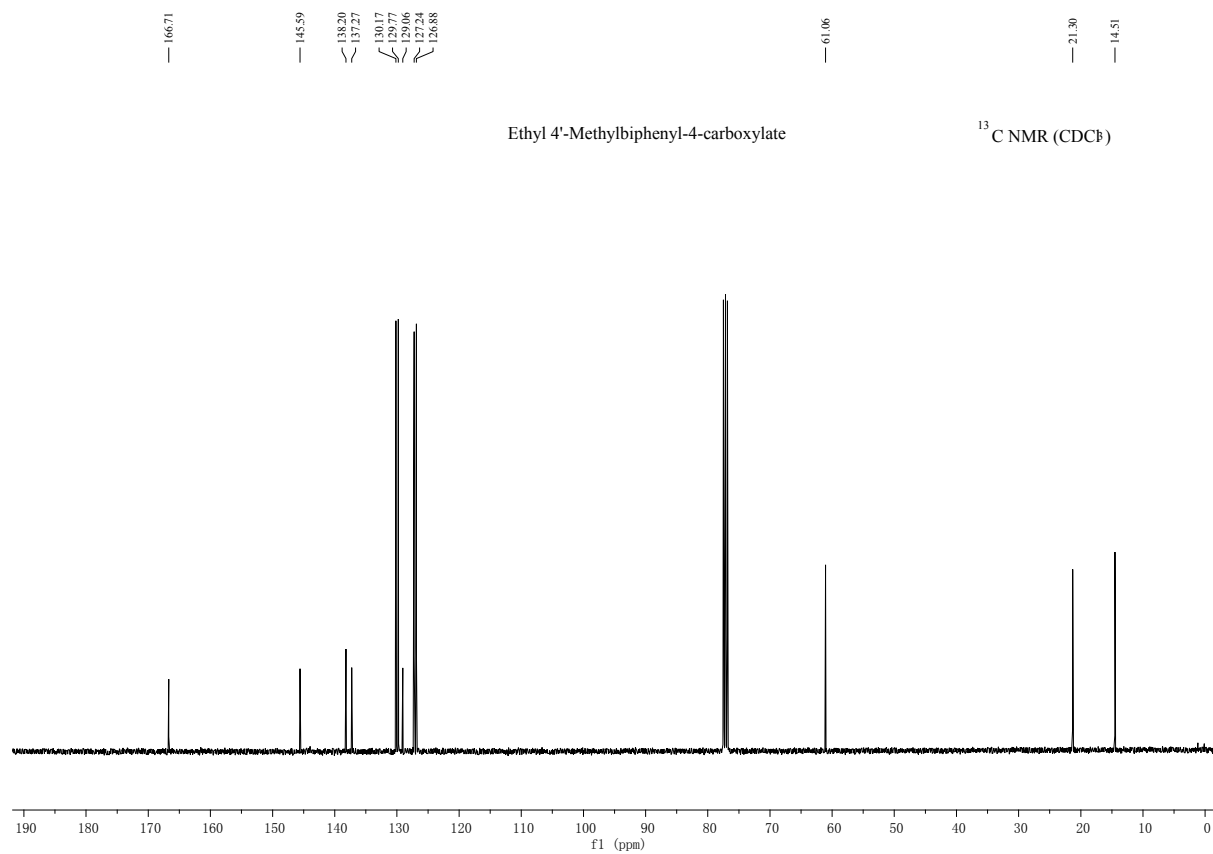

## 28. Ethyl 4'-methoxybiphenyl-4-carboxylate

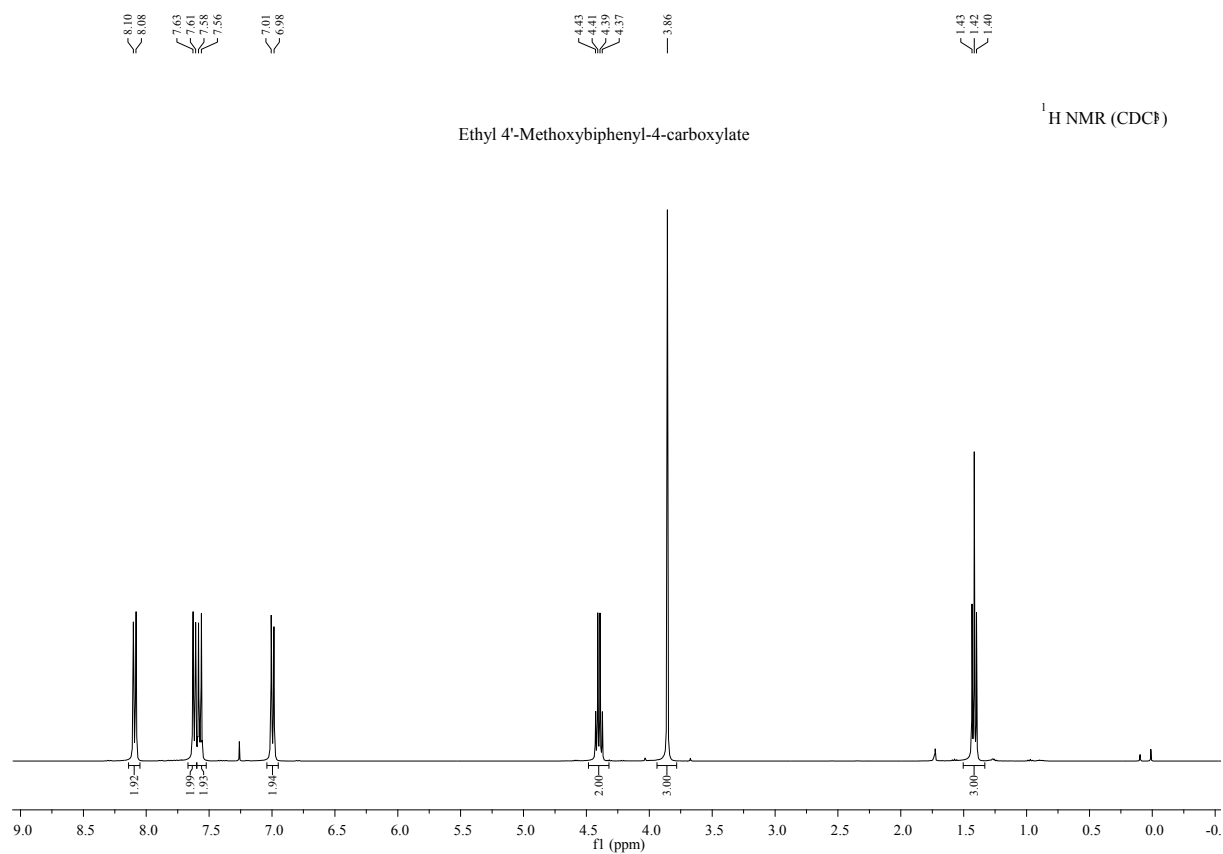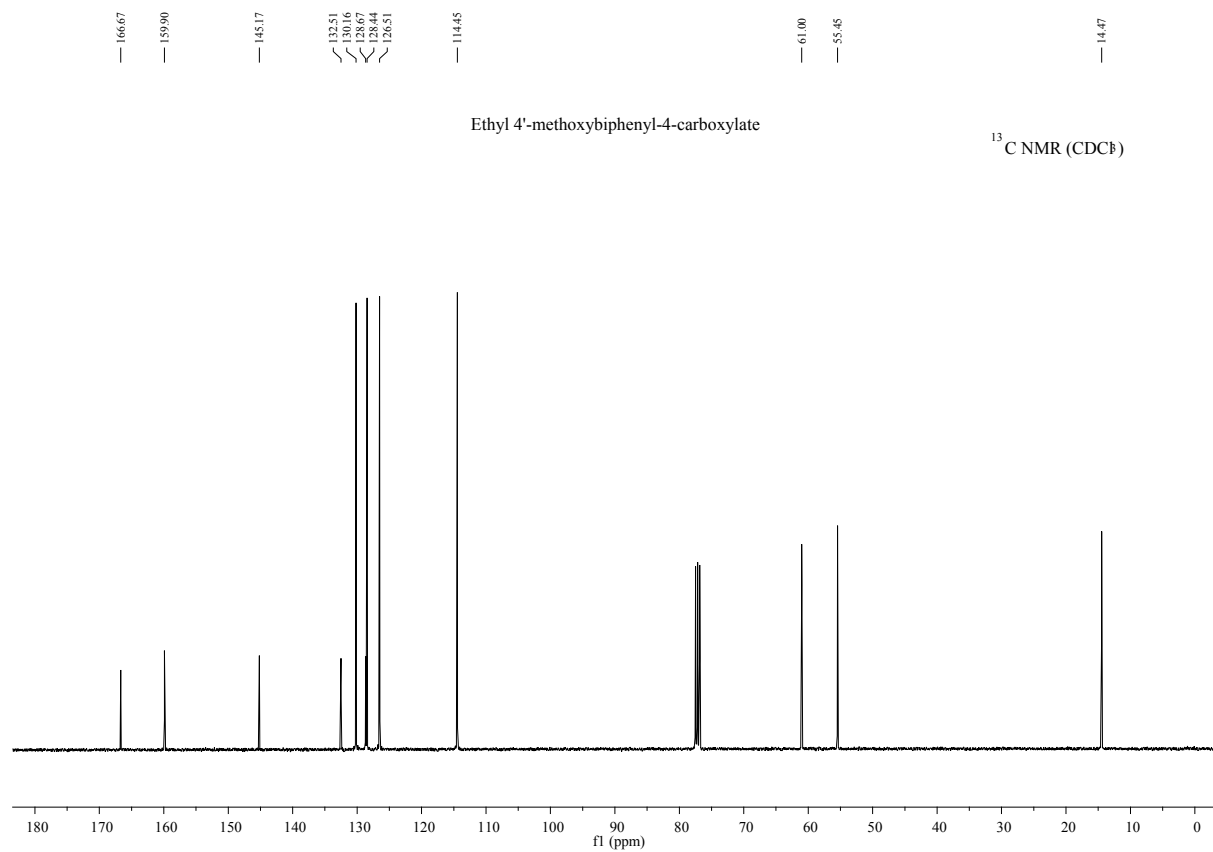



29. *N,N*-diethyl-4'-methylbiphenyl-4-carboxamide

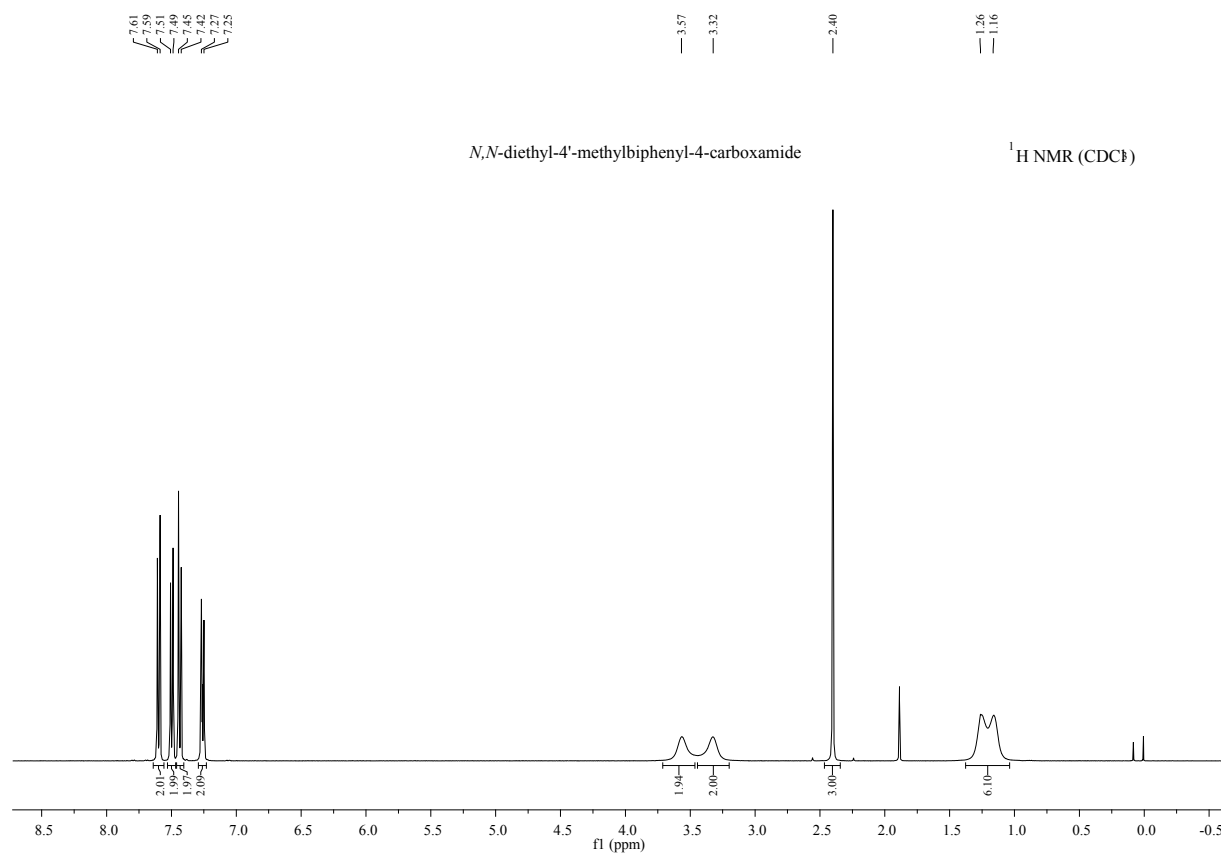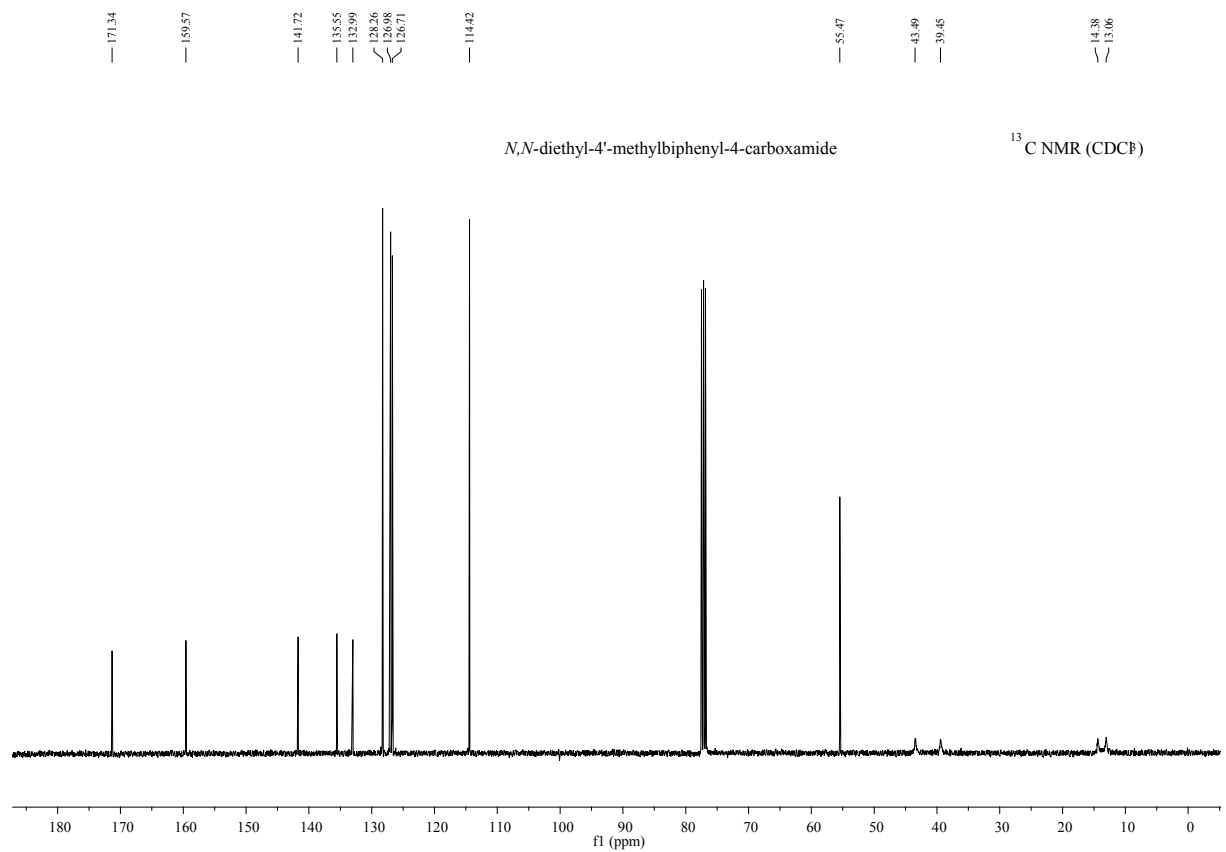

### 30. *N,N*-Diethyl-4'-methoxybiphenyl-4-carboxamide

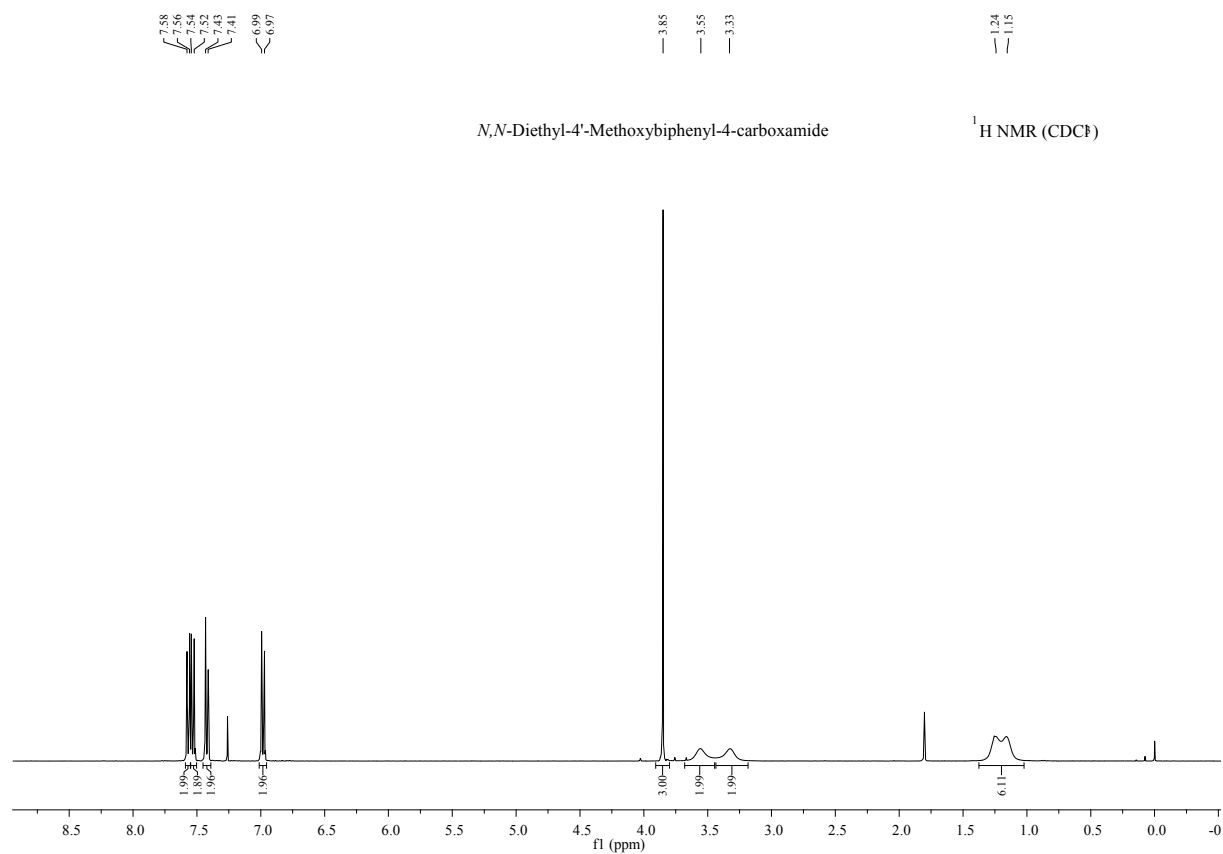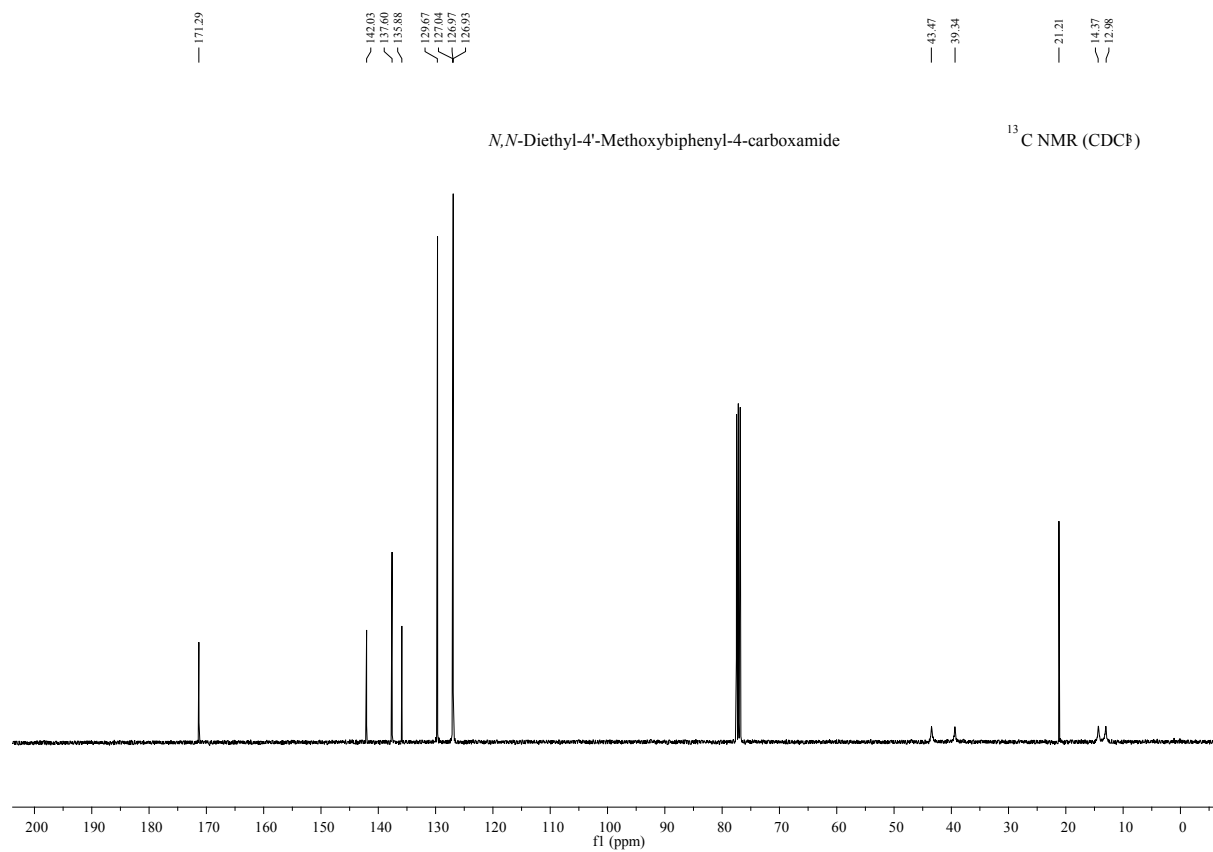

### 31. 4'-Methylbiphenyl-4-carbonitrile

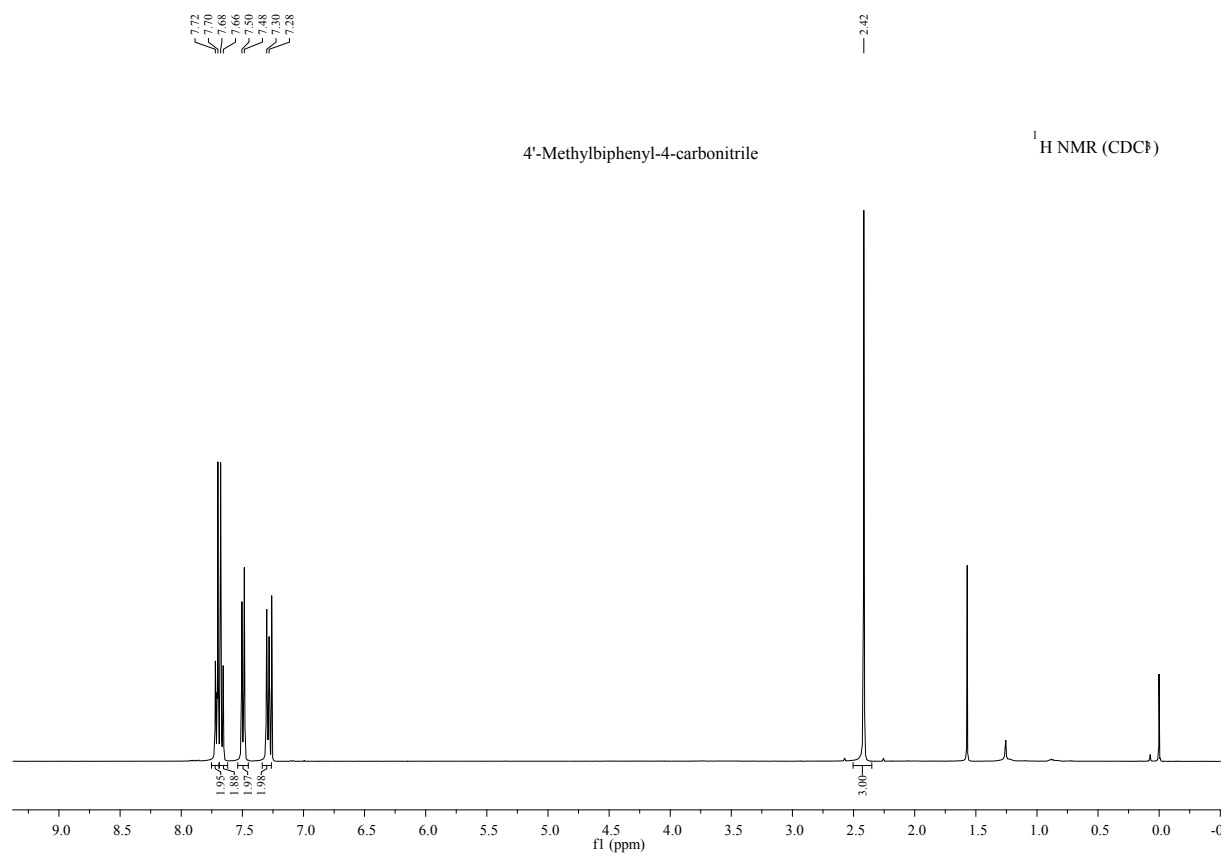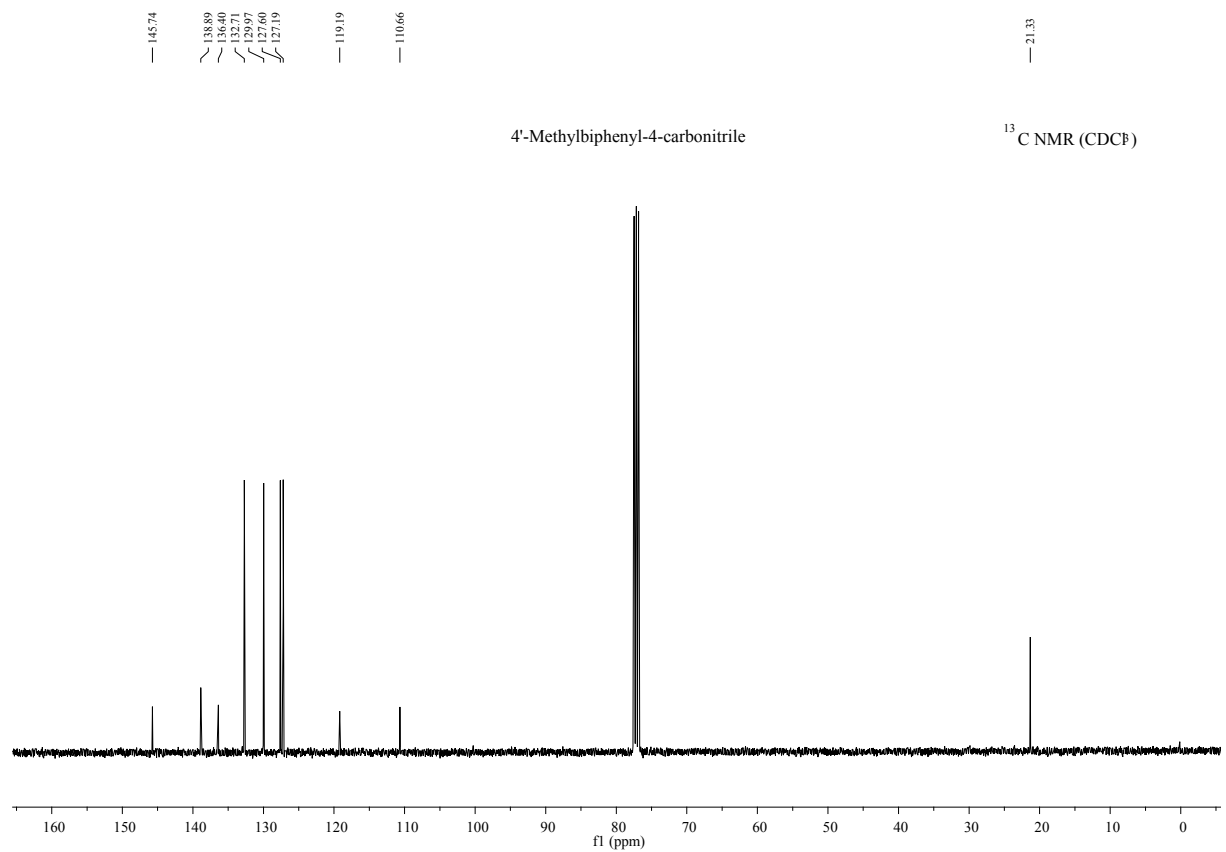

### 32. (4'-Methylbiphenyl-2-yl)(phenyl)methanone

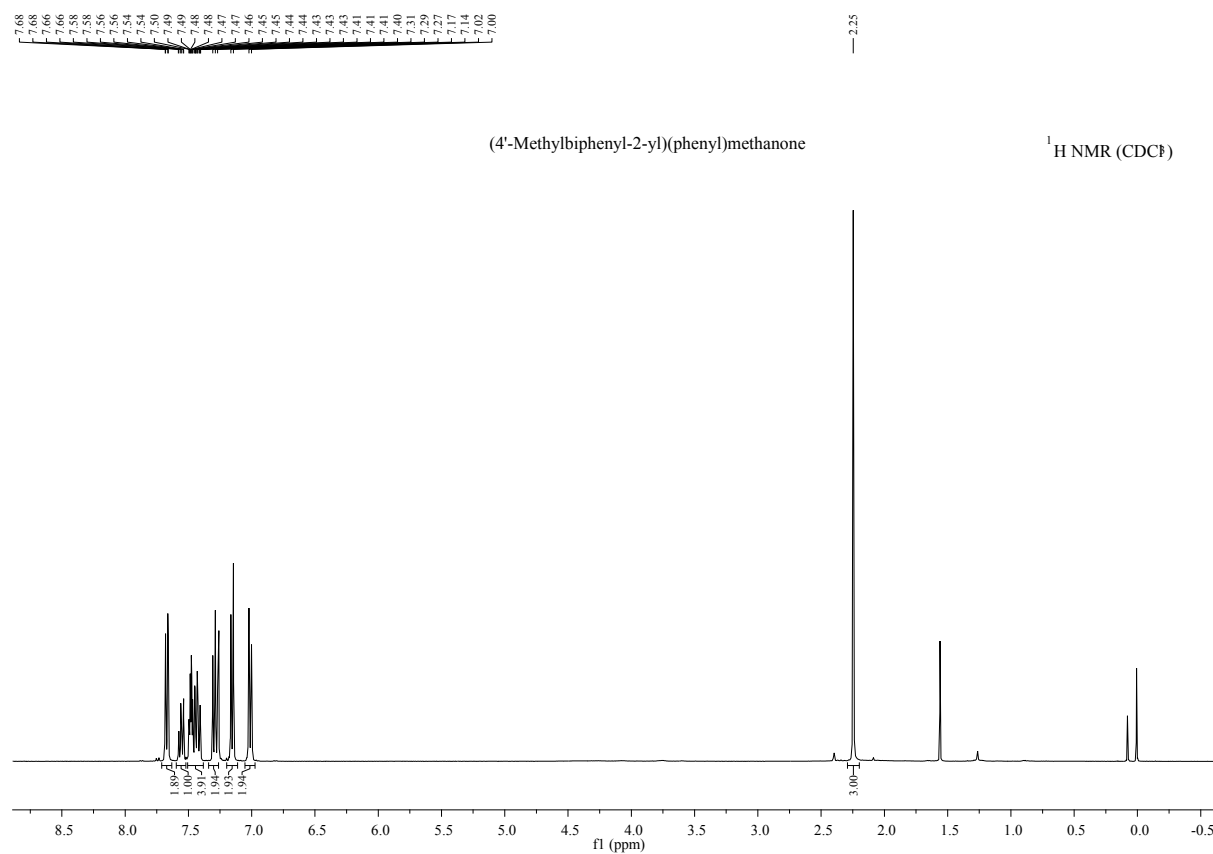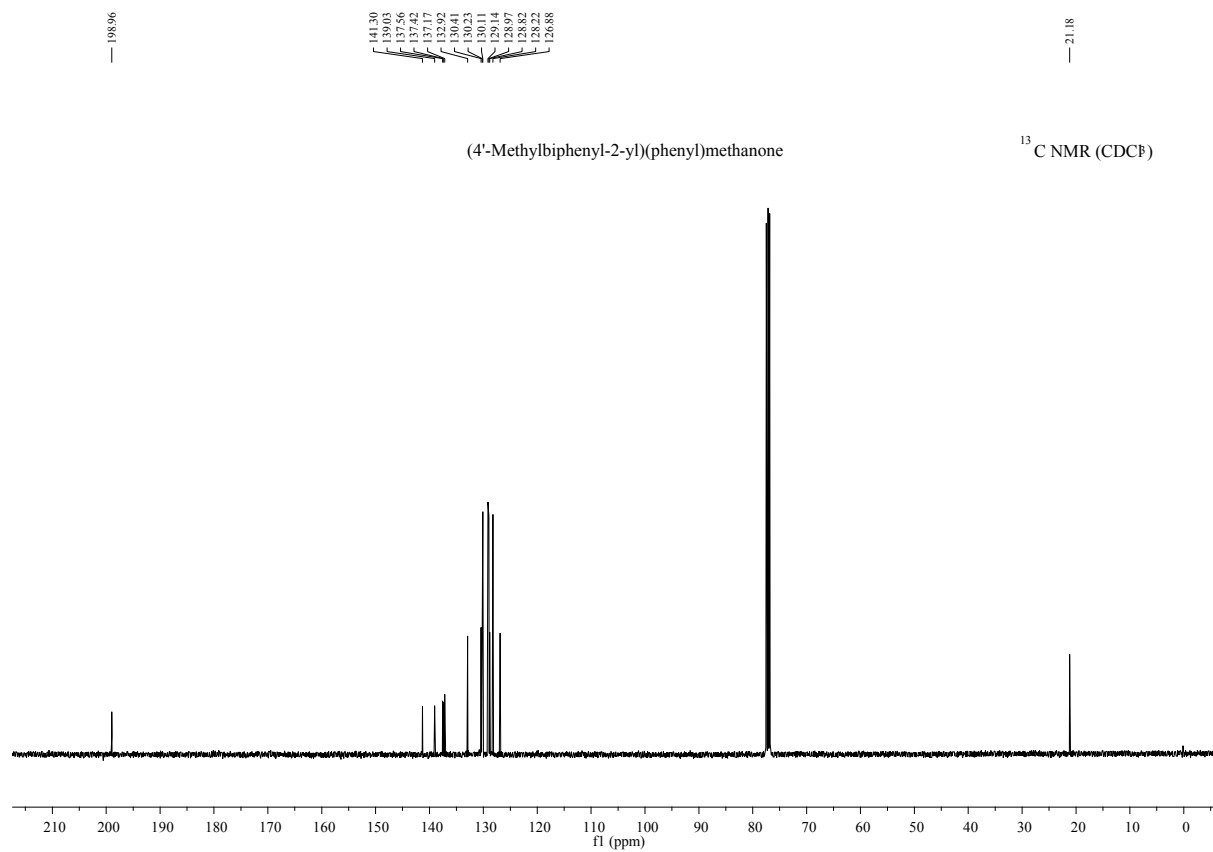

### 33. (4'-Methoxybiphenyl-2-yl)(phenyl)methanone

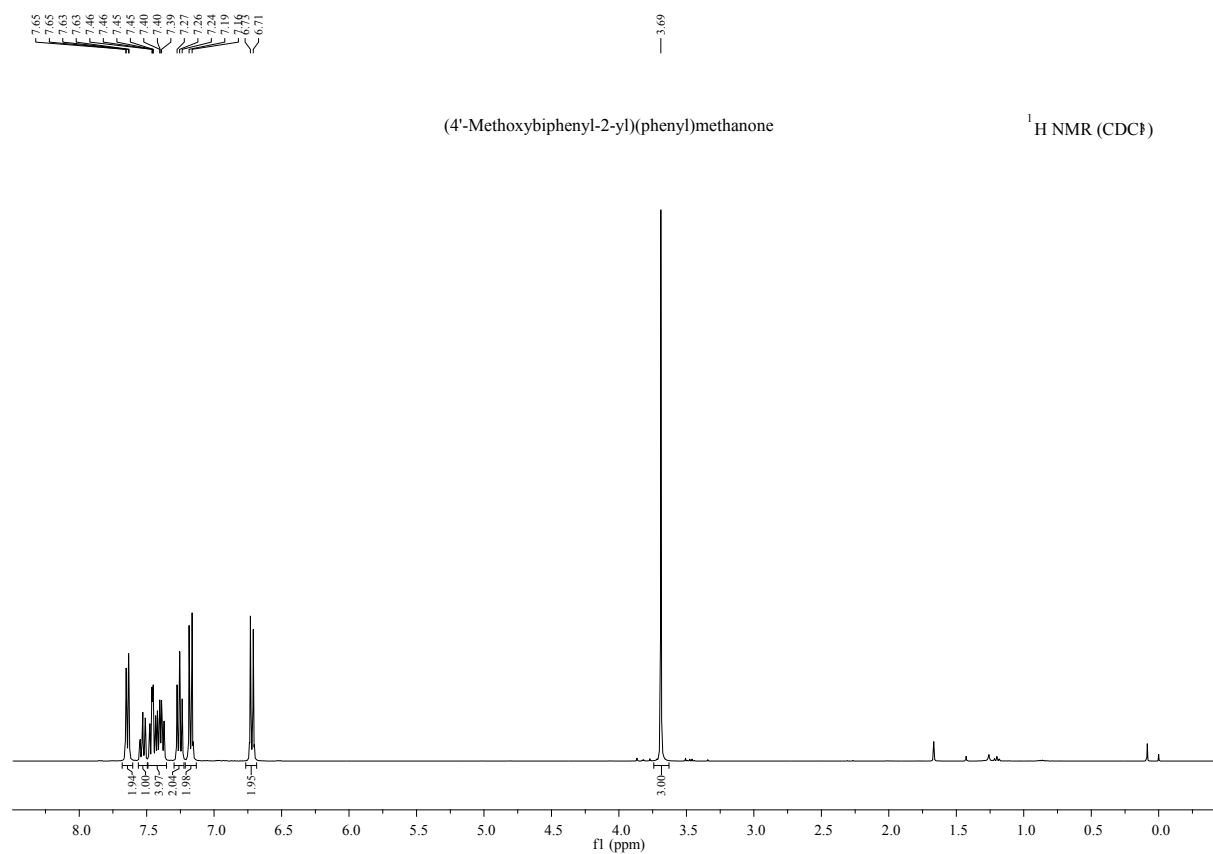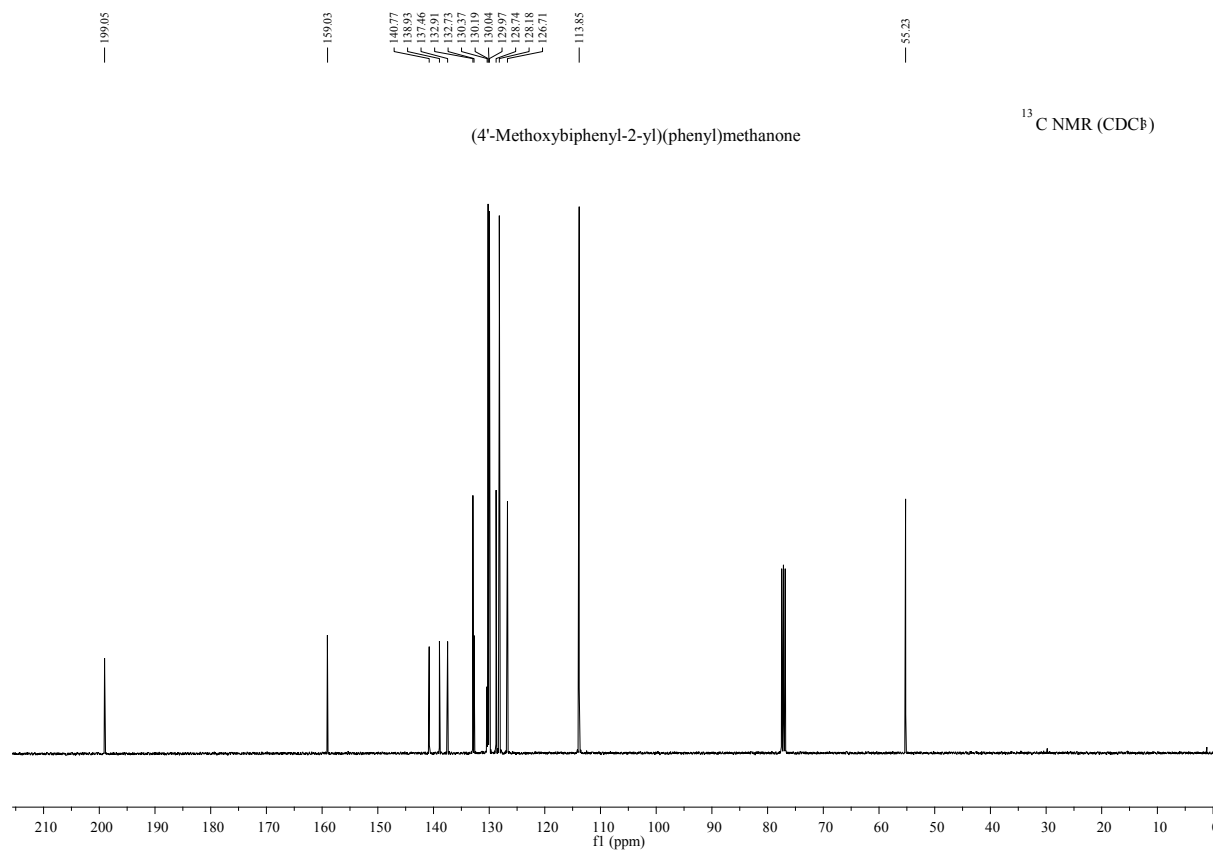

### 34. 4'-Methylbiphenyl-2-carbonitrile

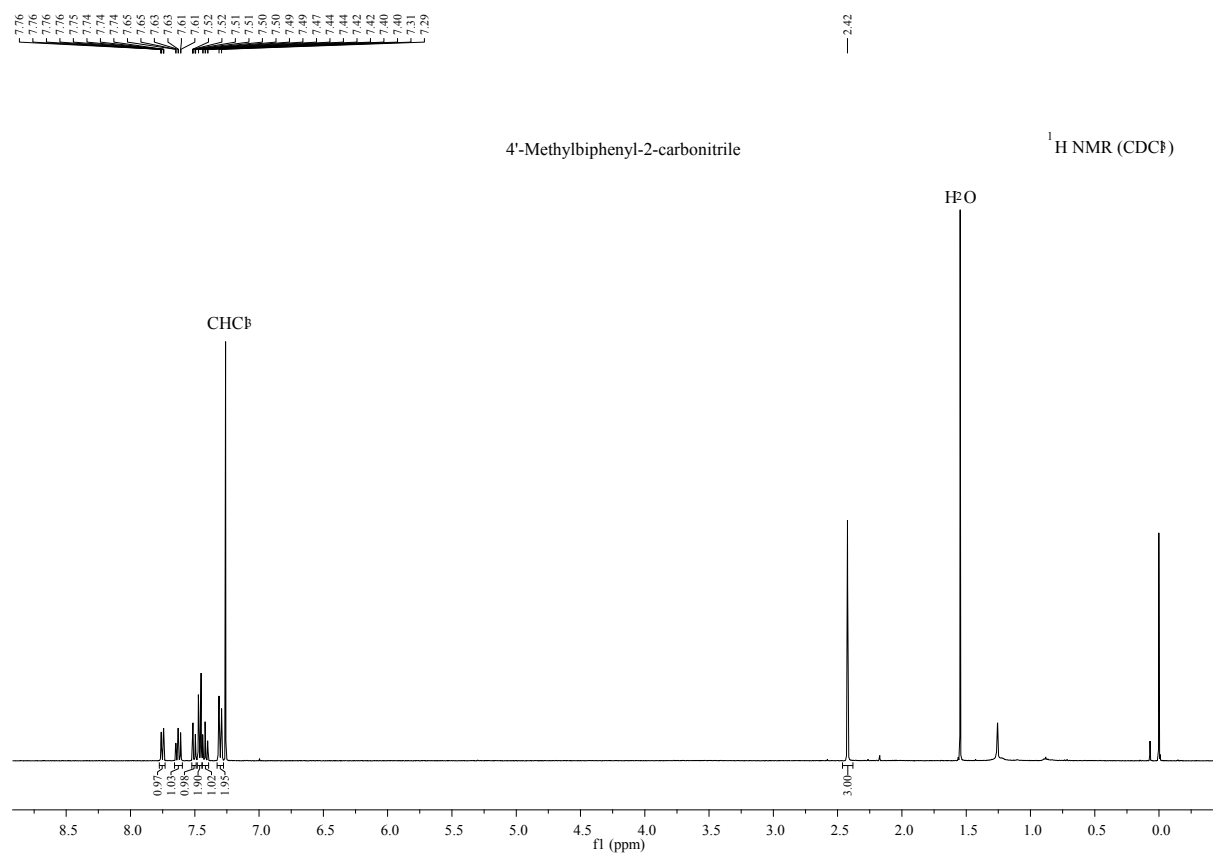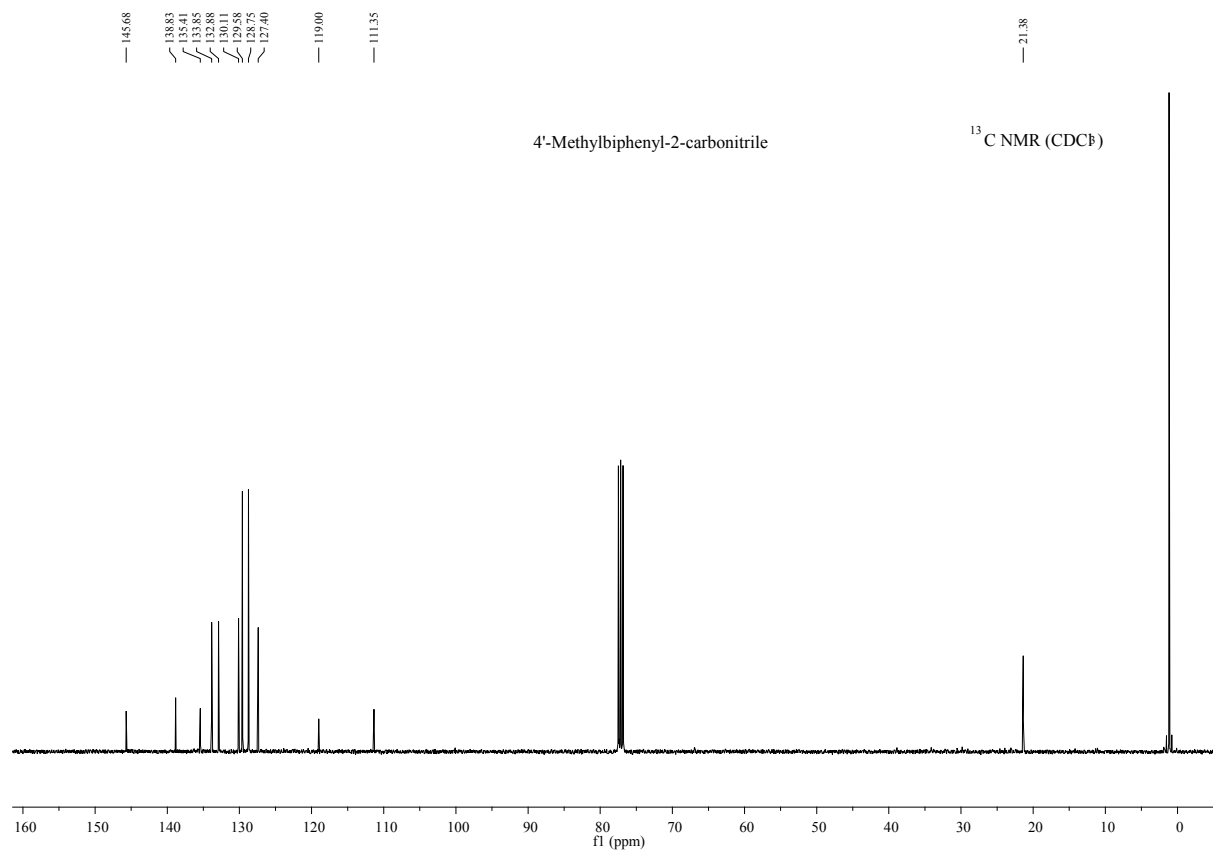

### 35. 4'-methoxy-2-methylbiphenyl

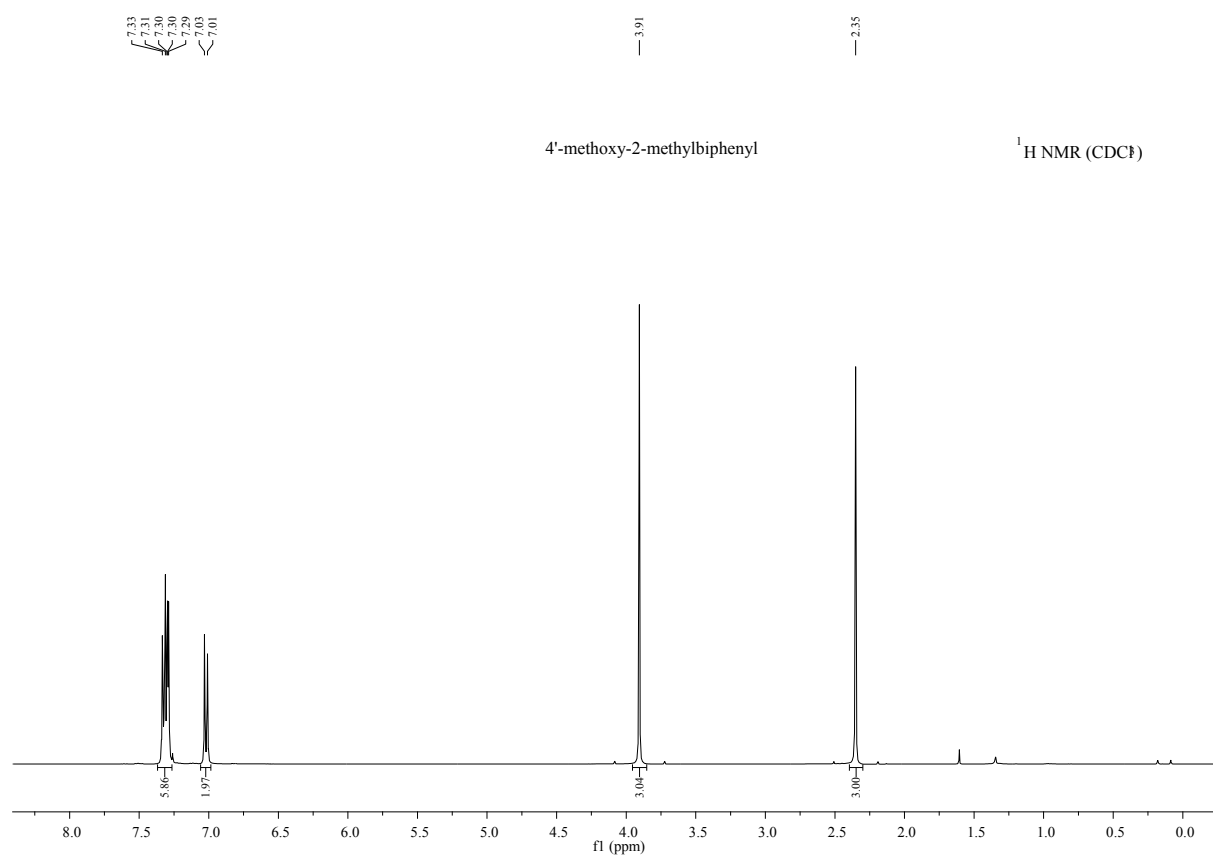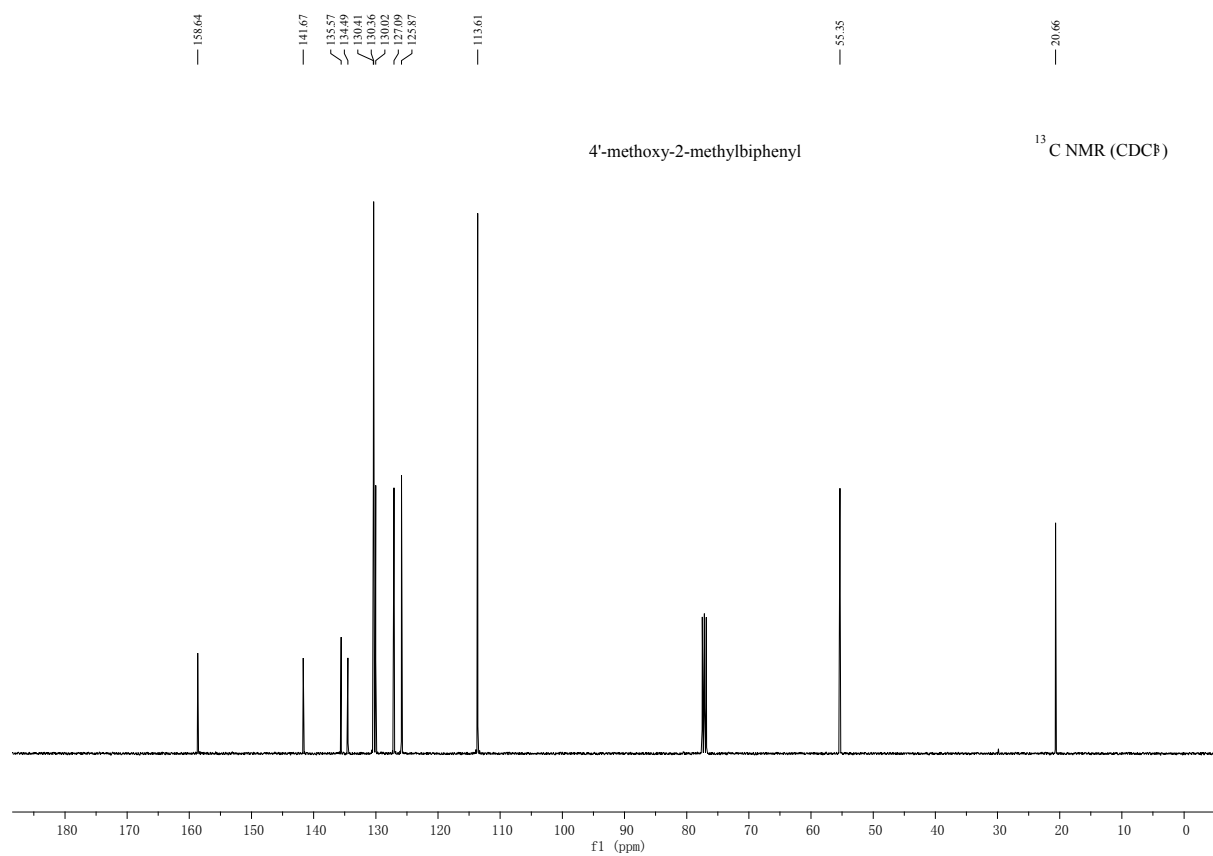

### 36. (2'-Methylbiphenyl-4-yl)(phenyl)methanone

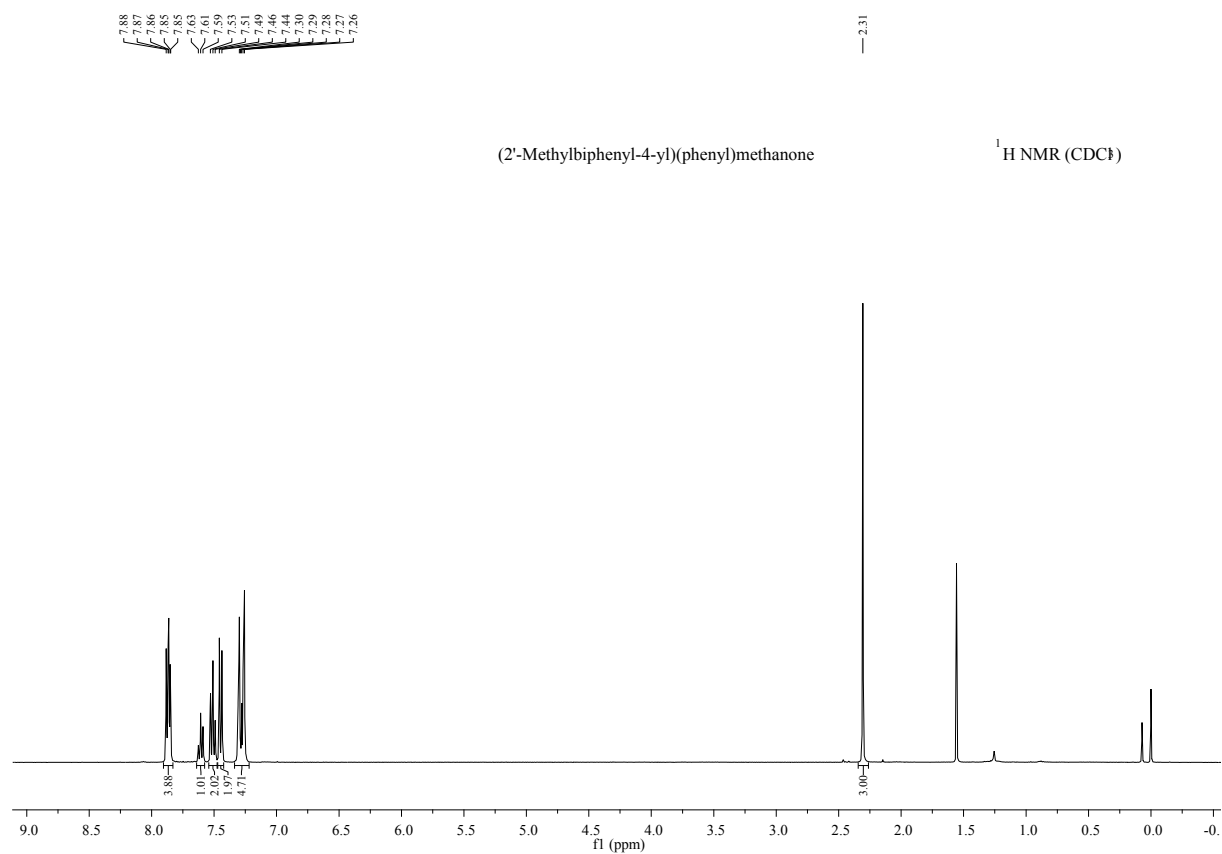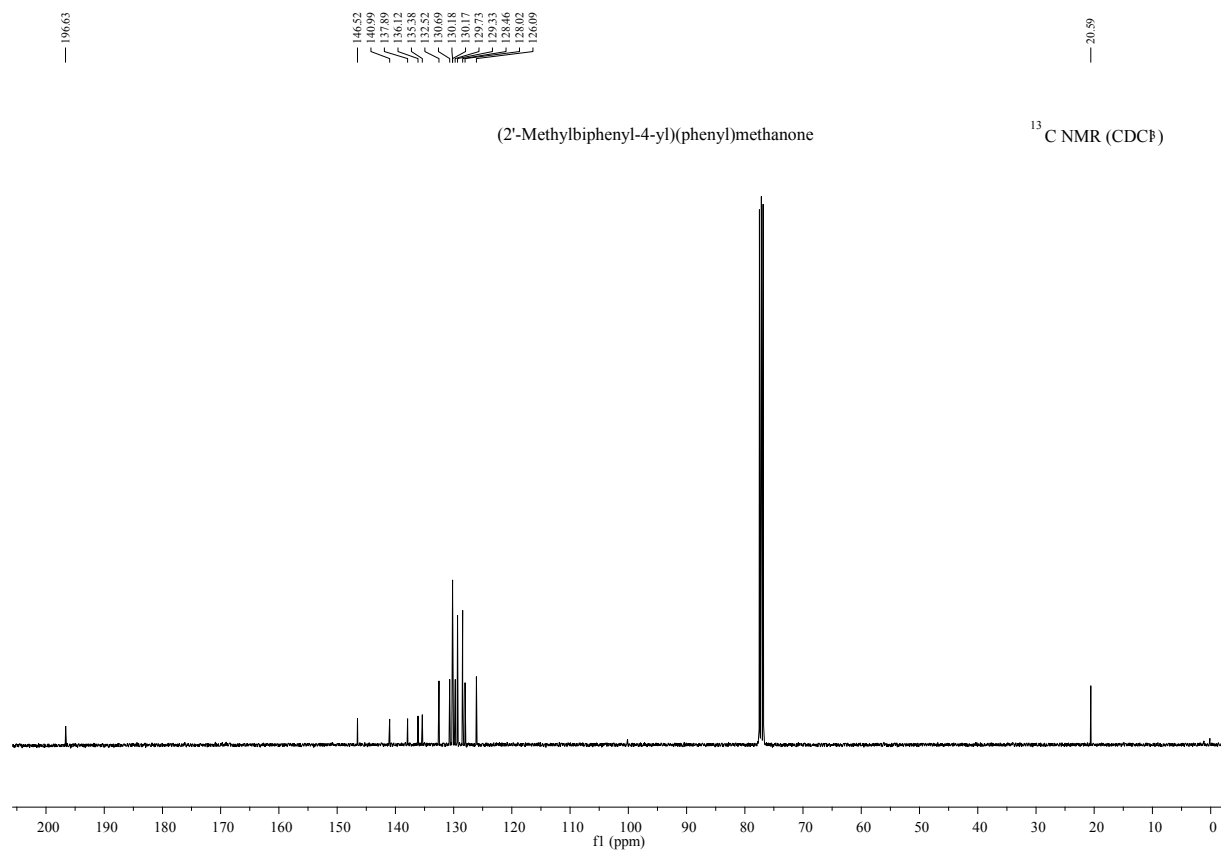



### 37. Ethyl 2'-methylbiphenyl-4-carboxylate

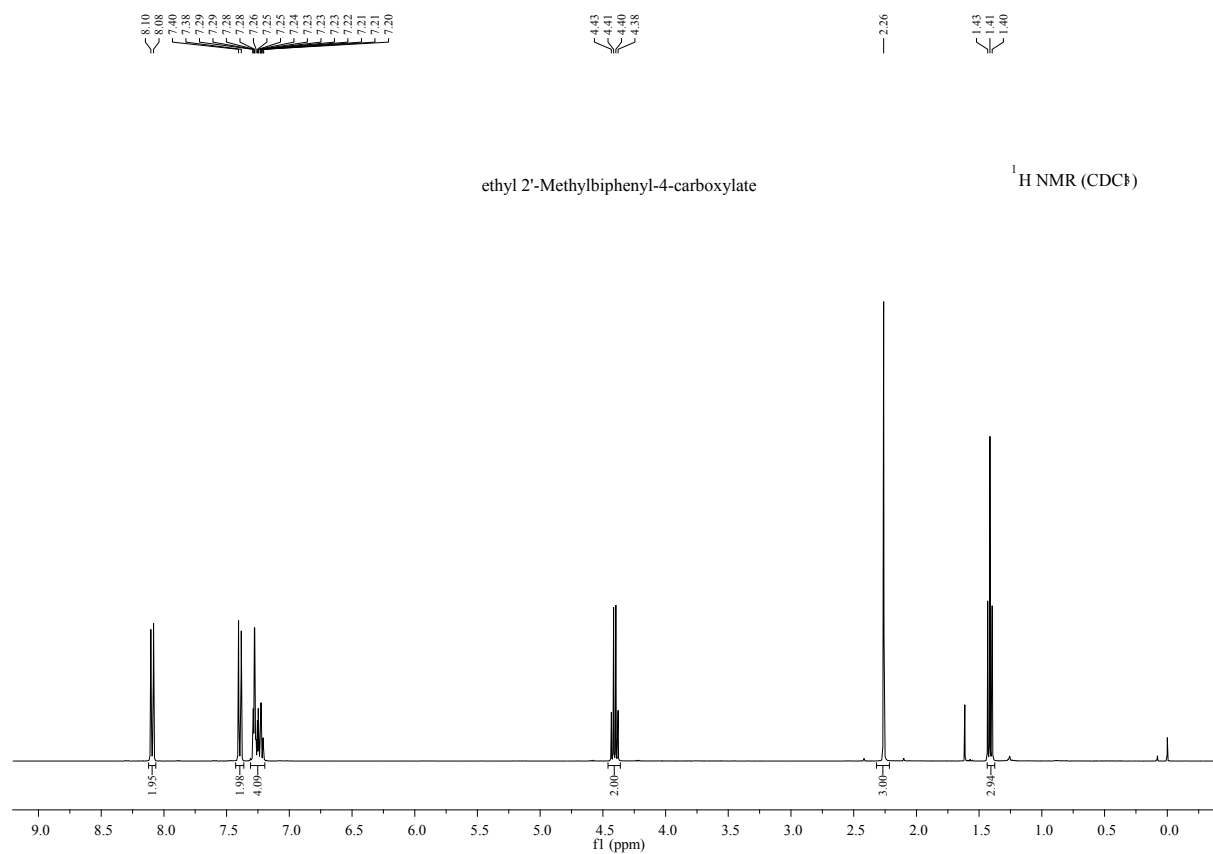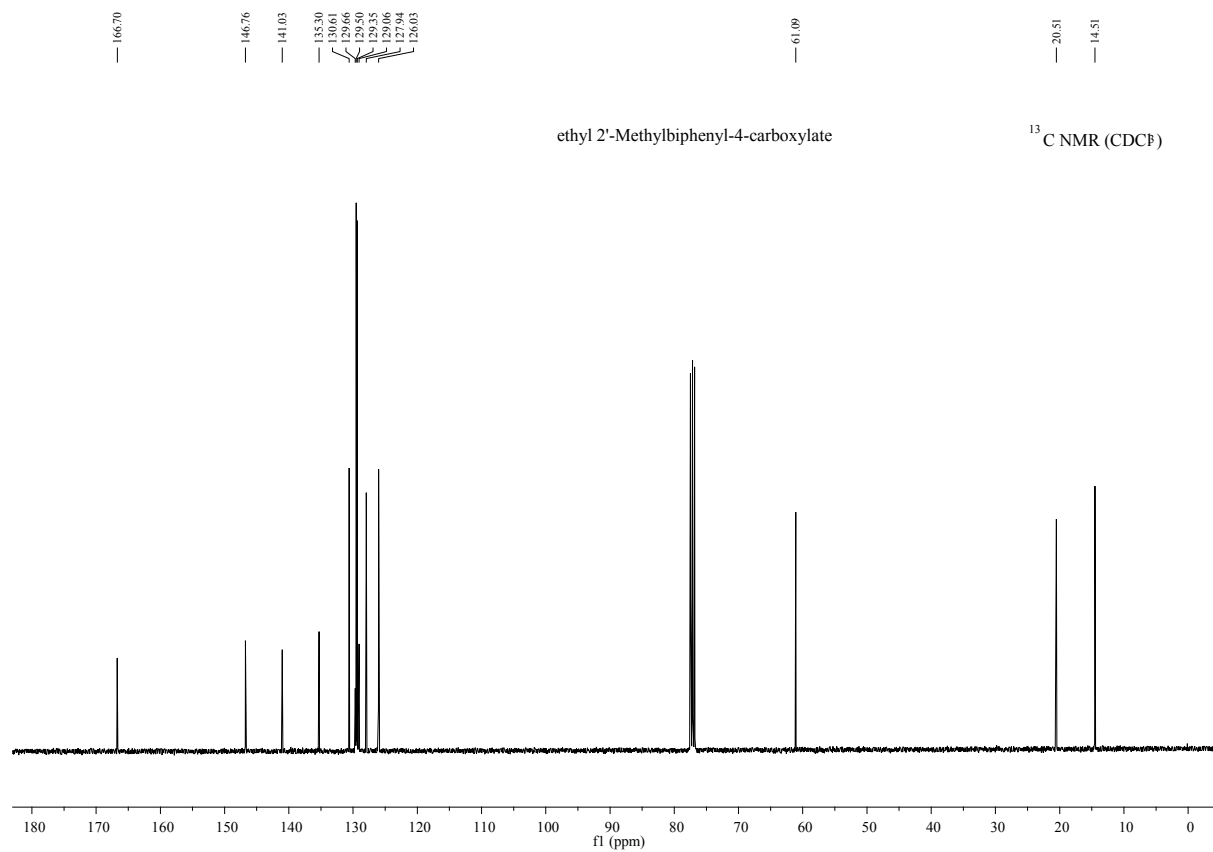

38. *N,N*-Diethyl-2'-methylbiphenyl-4-carboxamide

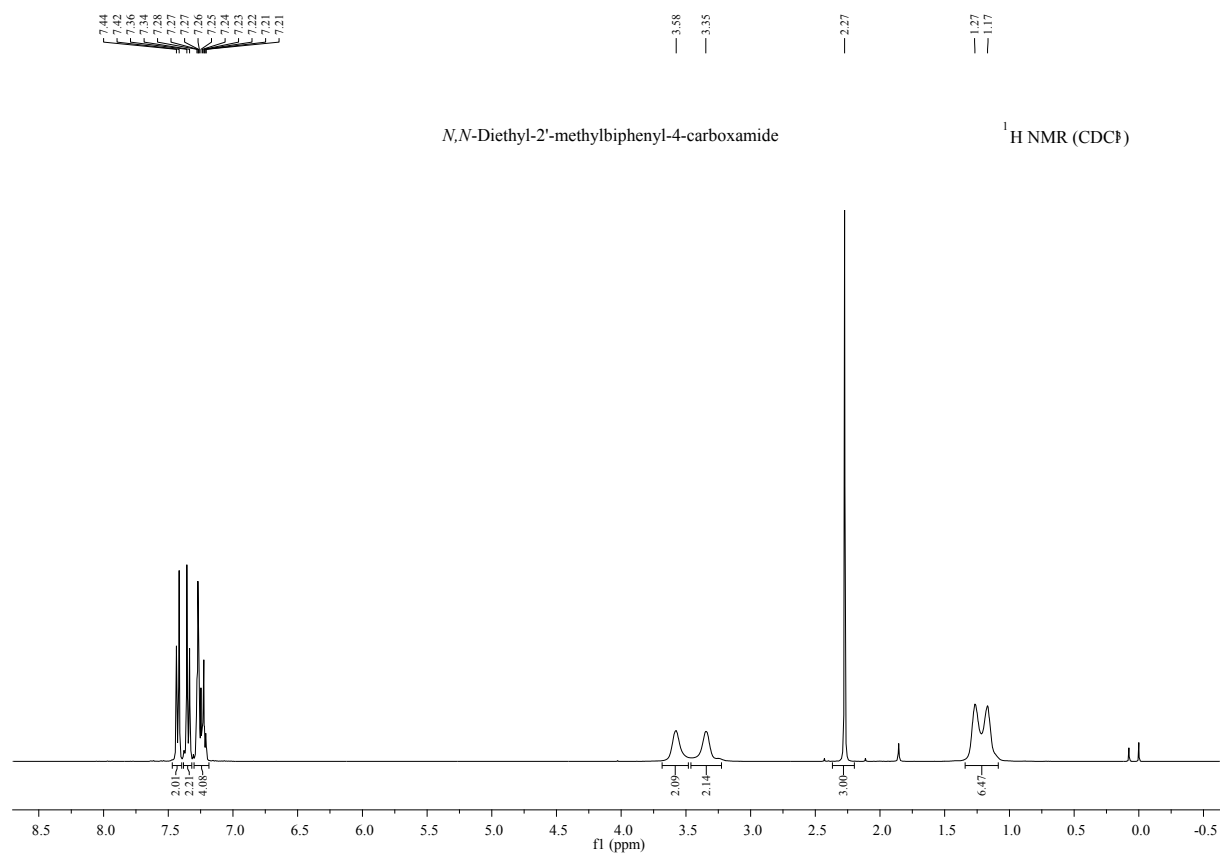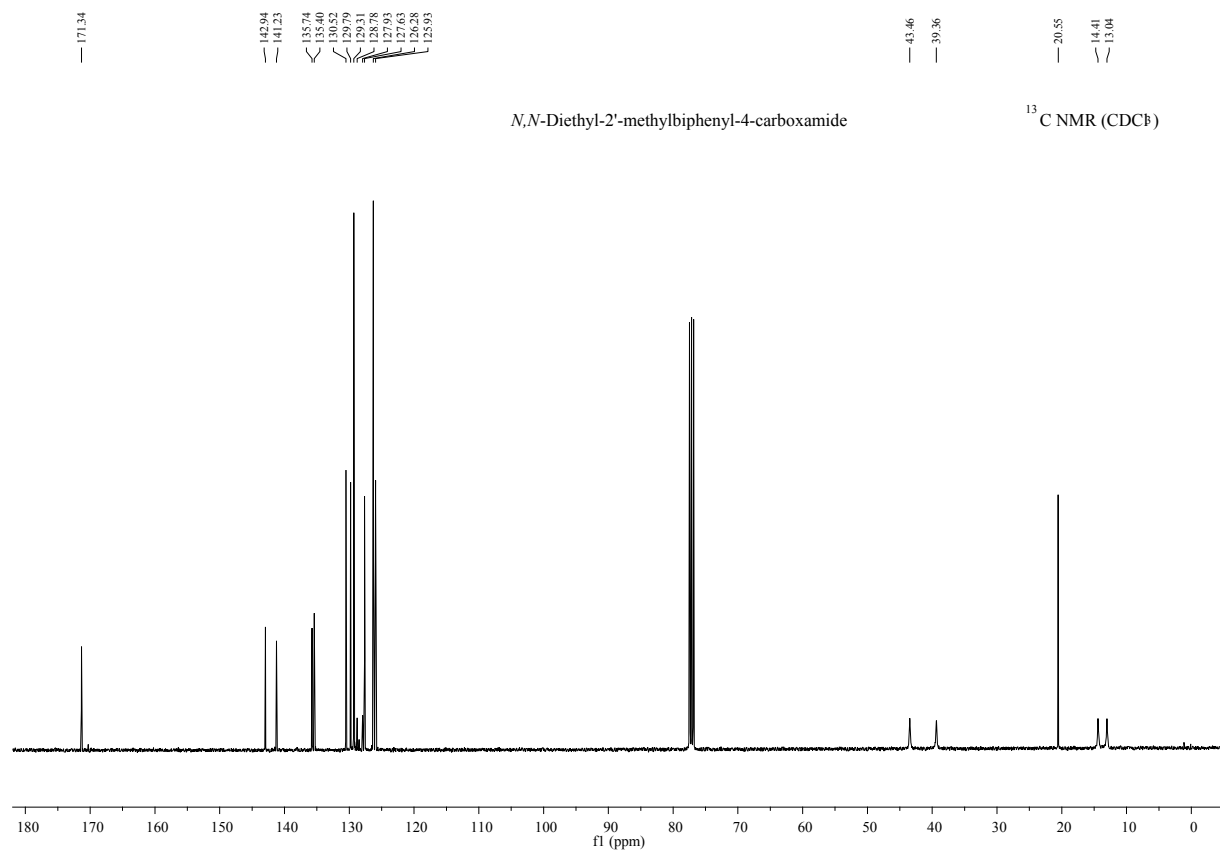

### 39. 2-*p*-Tolyl-nicotinonitrile

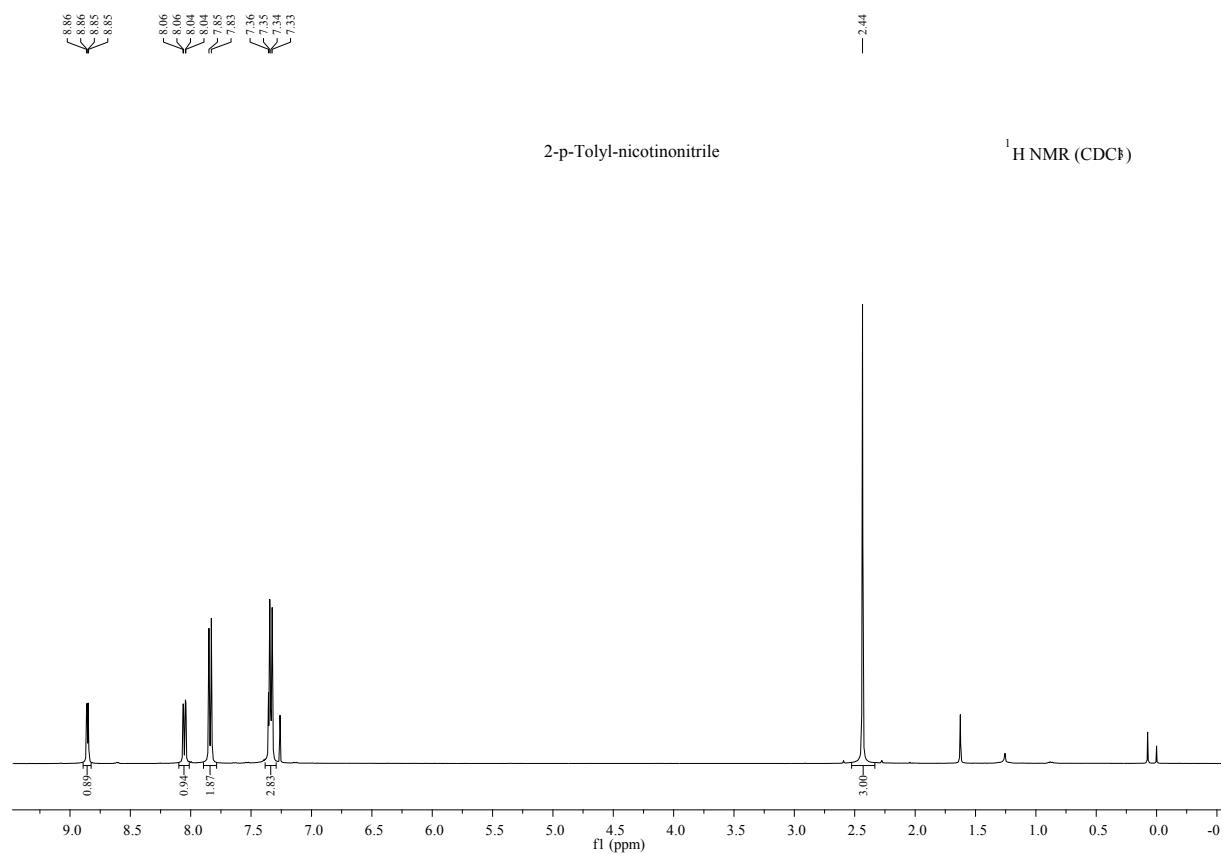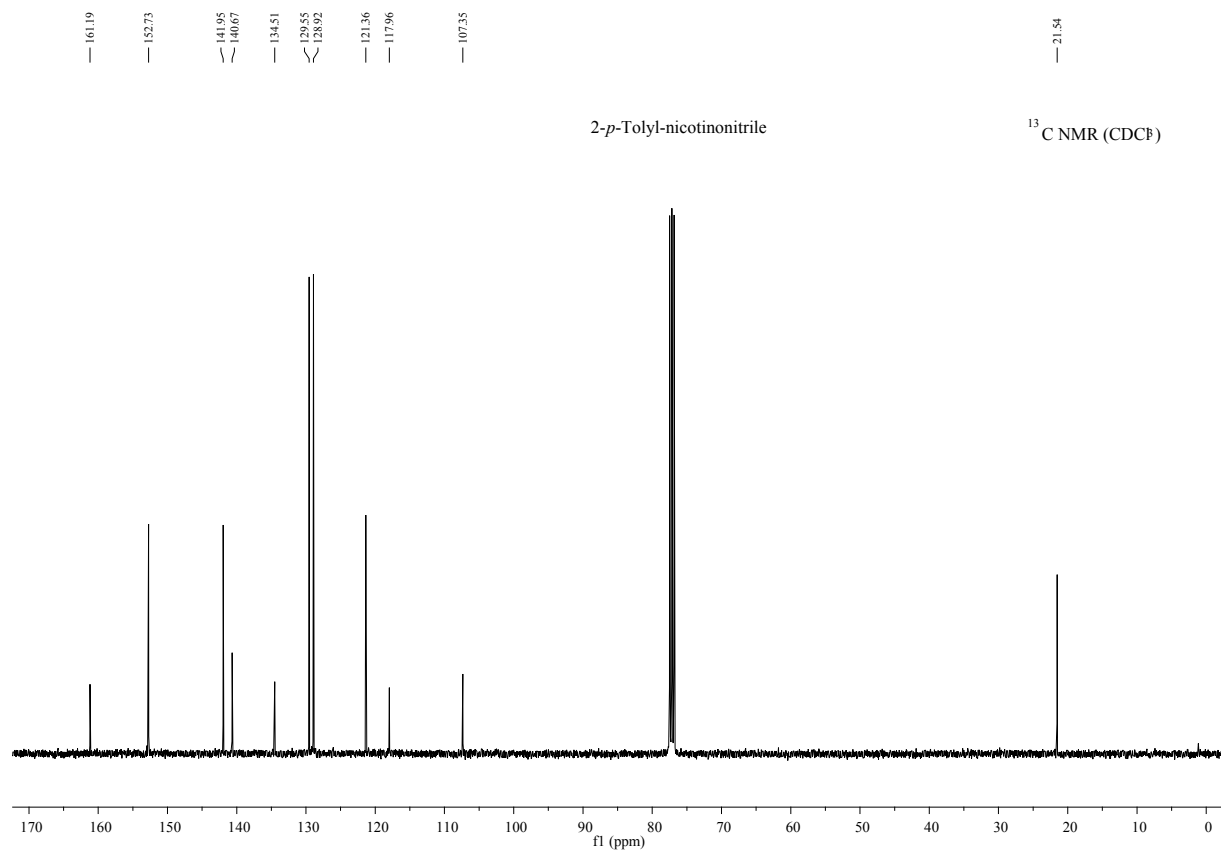

# 40. 2-Methoxy-6-p-tolylpyridine

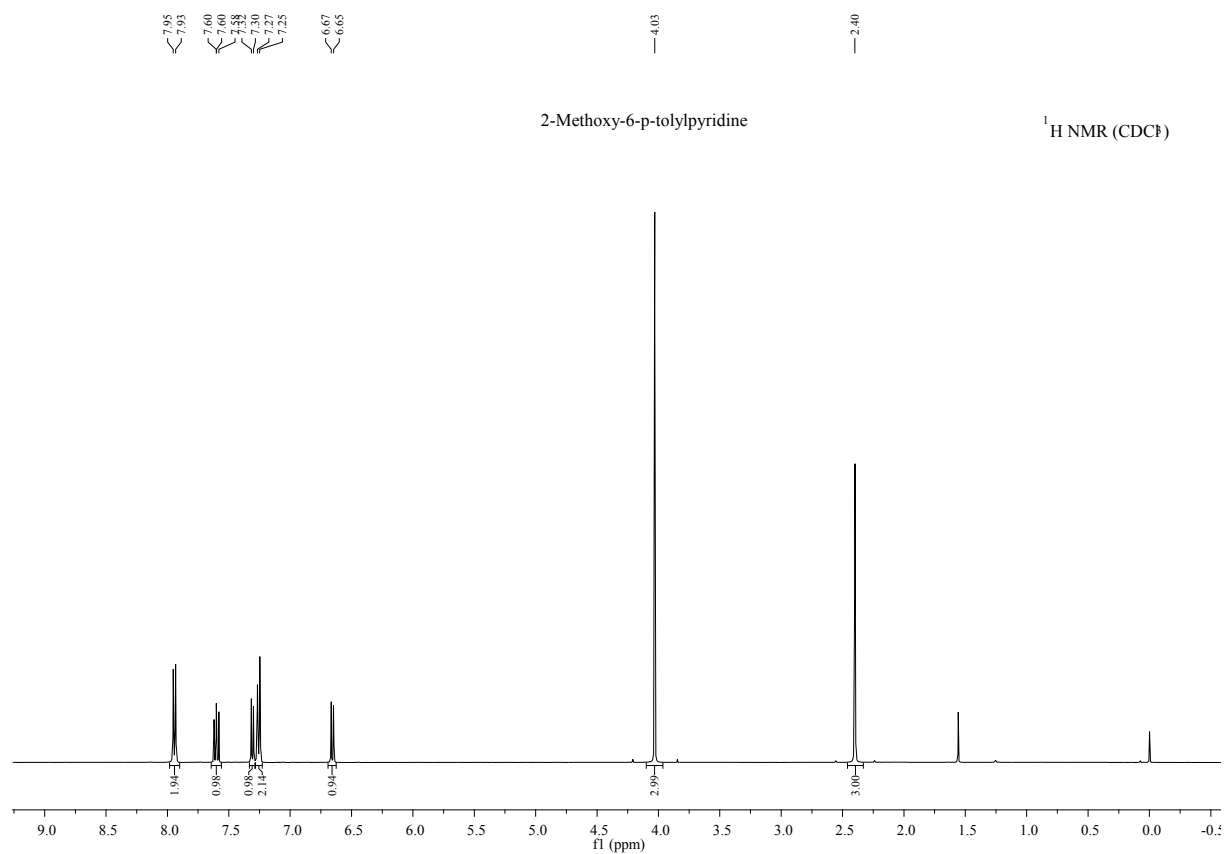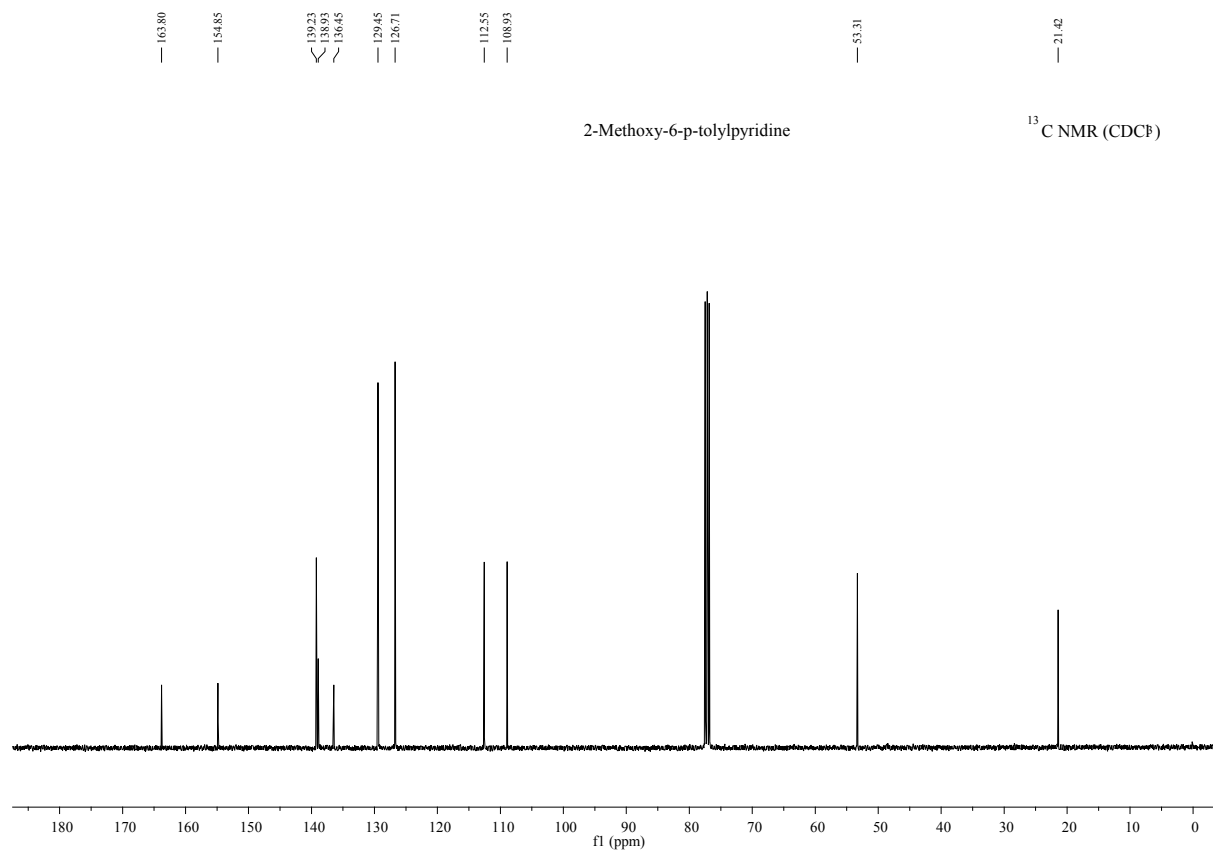

# 41. 2-(4-Methylphenyl)-4-methylquinoline

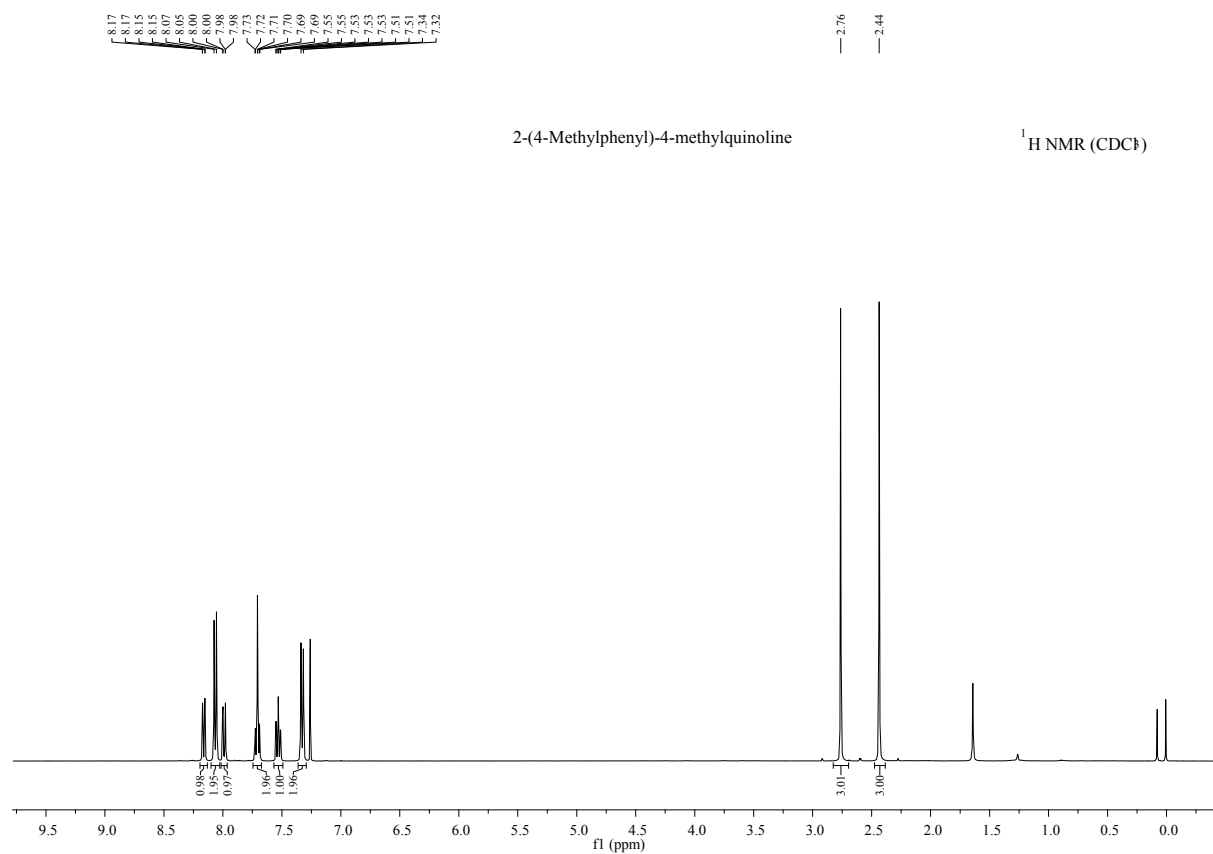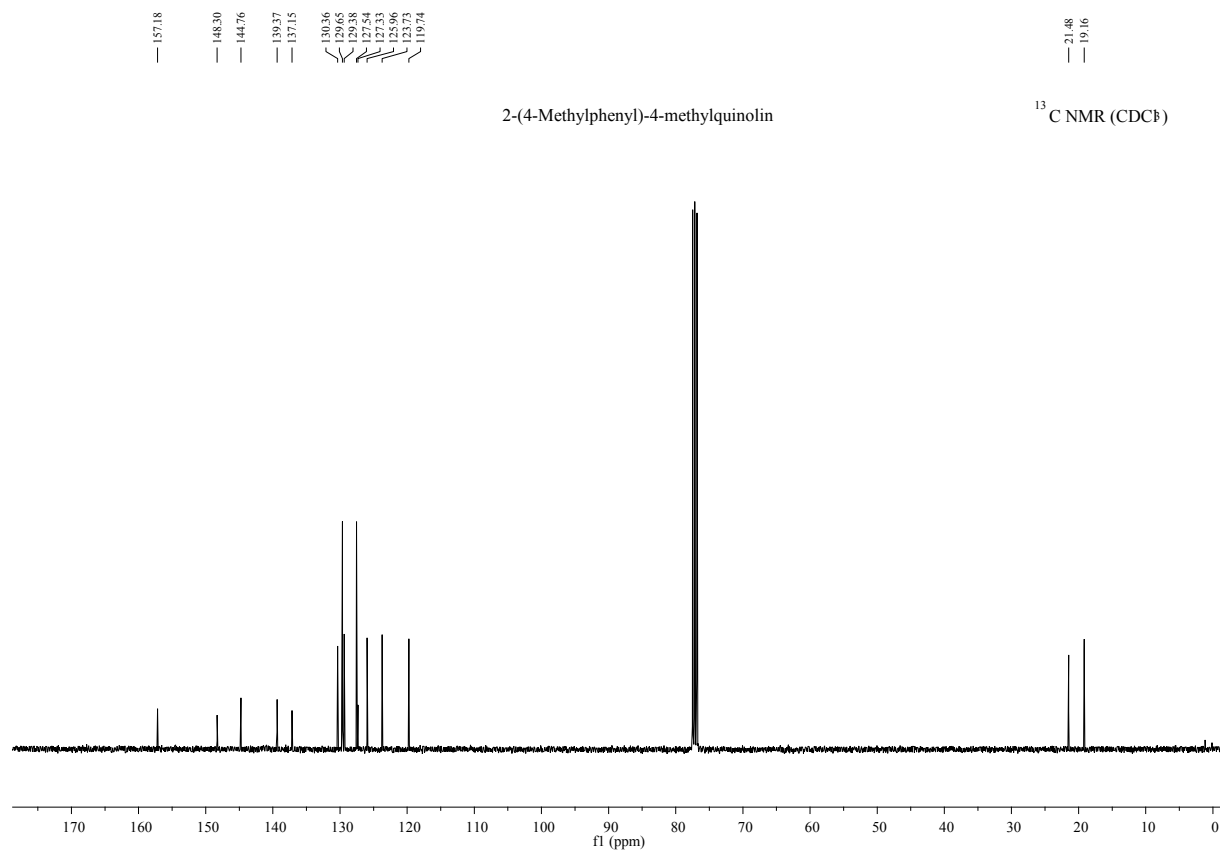

## 42. 2-(4-Methoxyphenyl)-4-methylquinoline

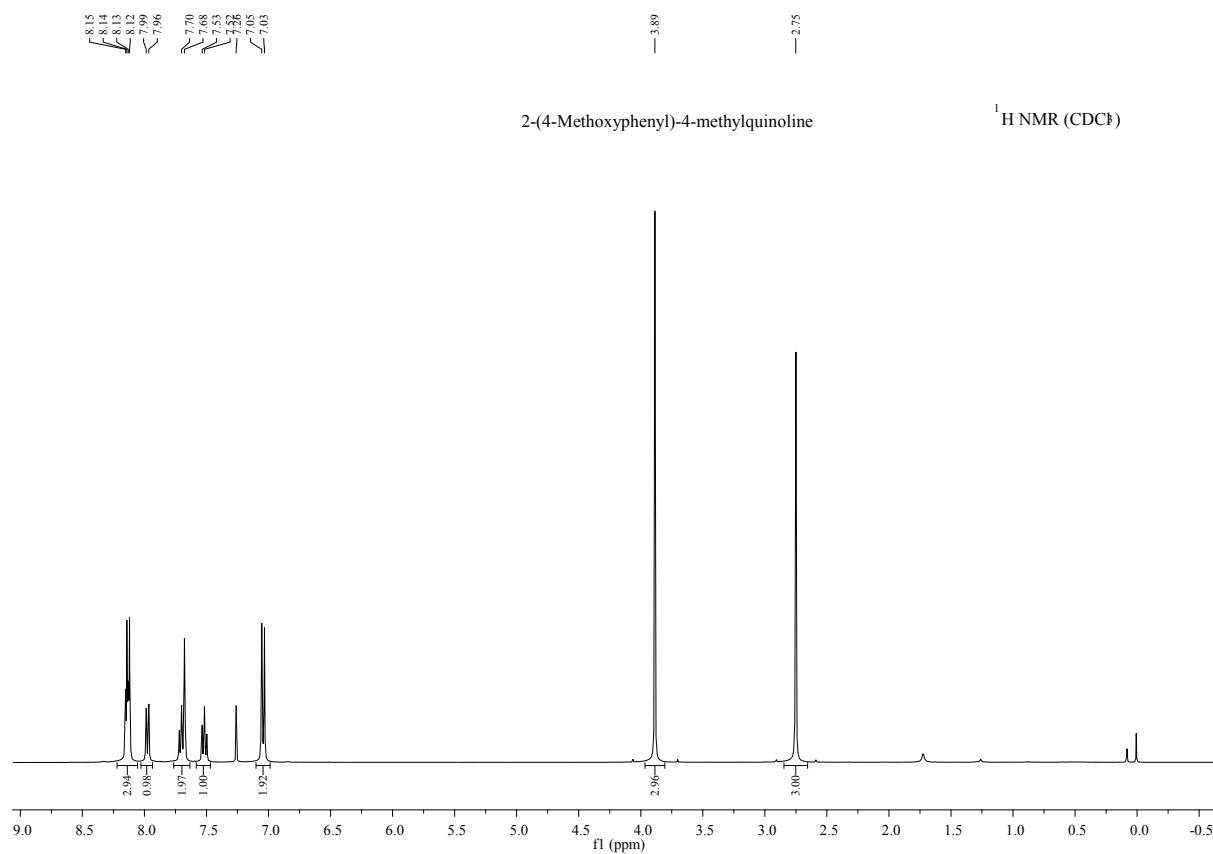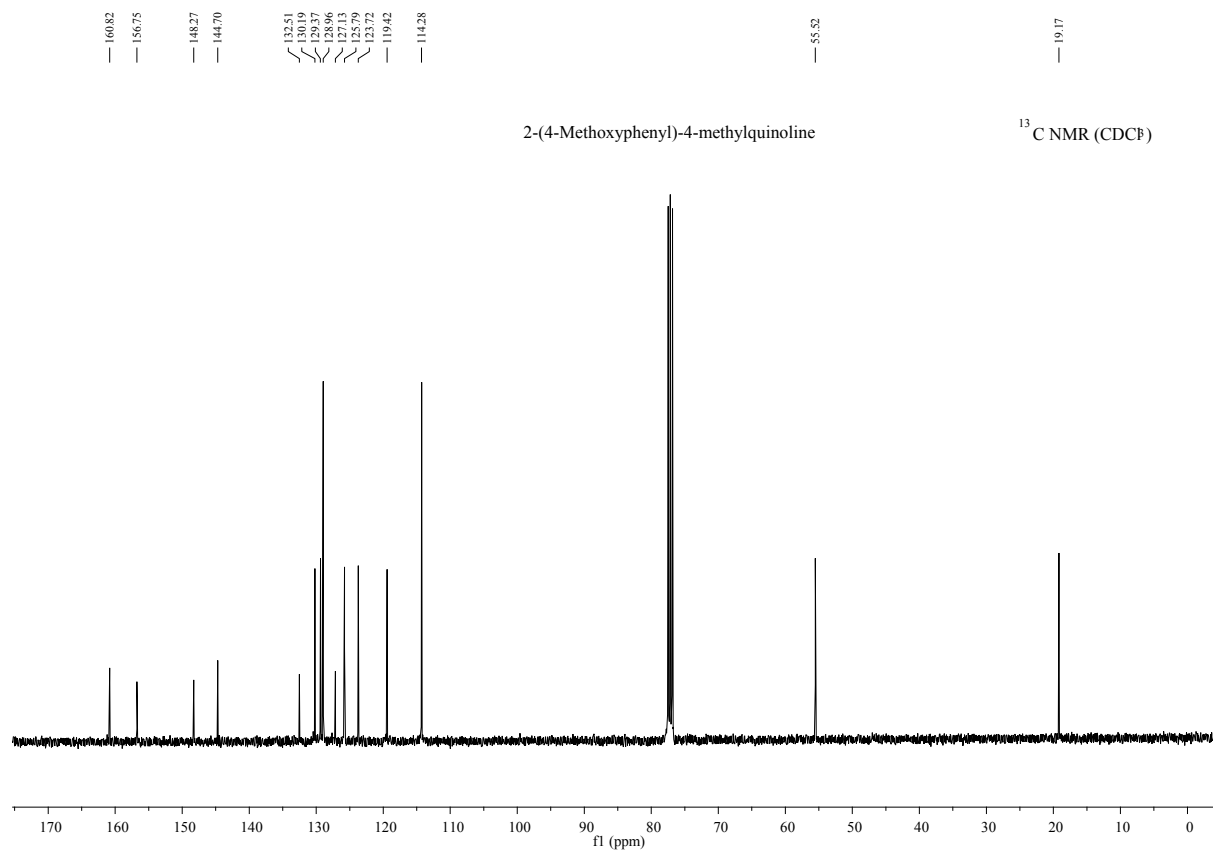

43. (4'-(Trifluoromethyl)biphenyl-4-yl)(phenyl)methanone

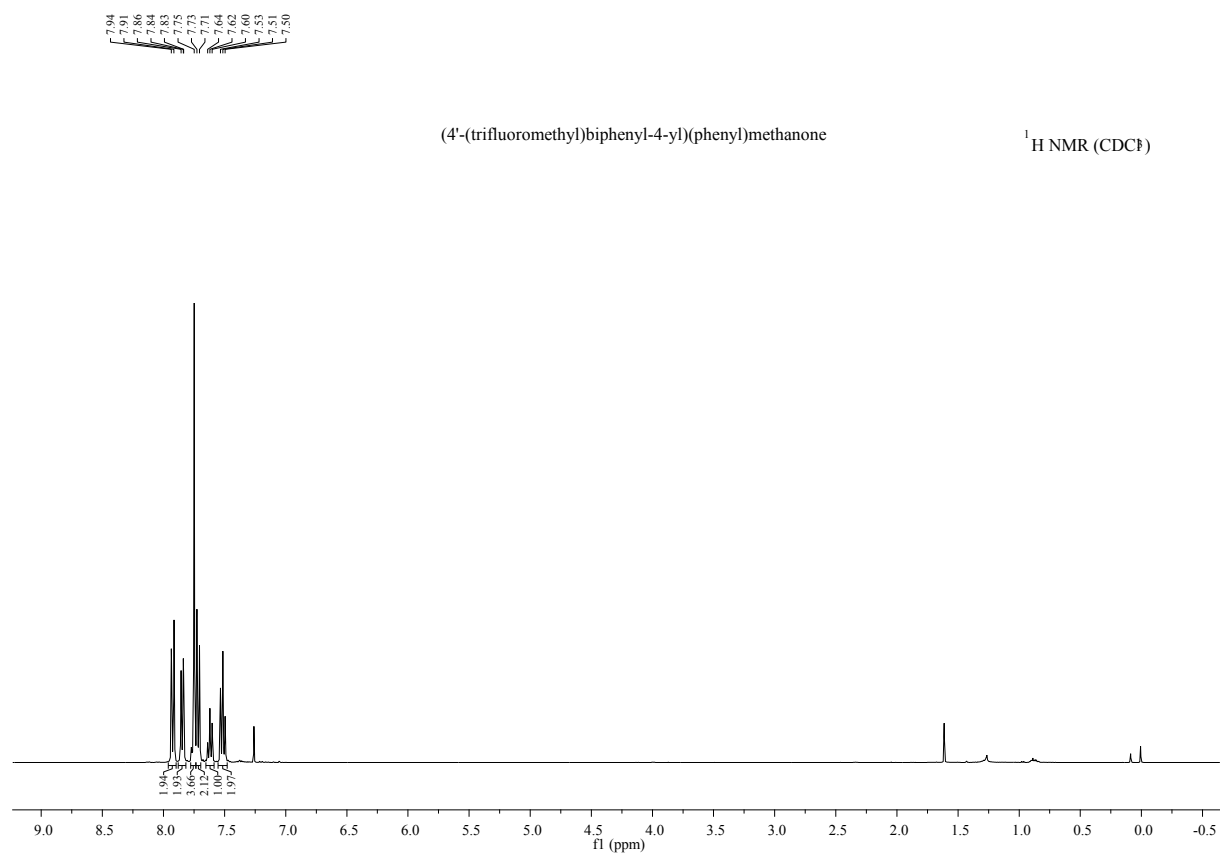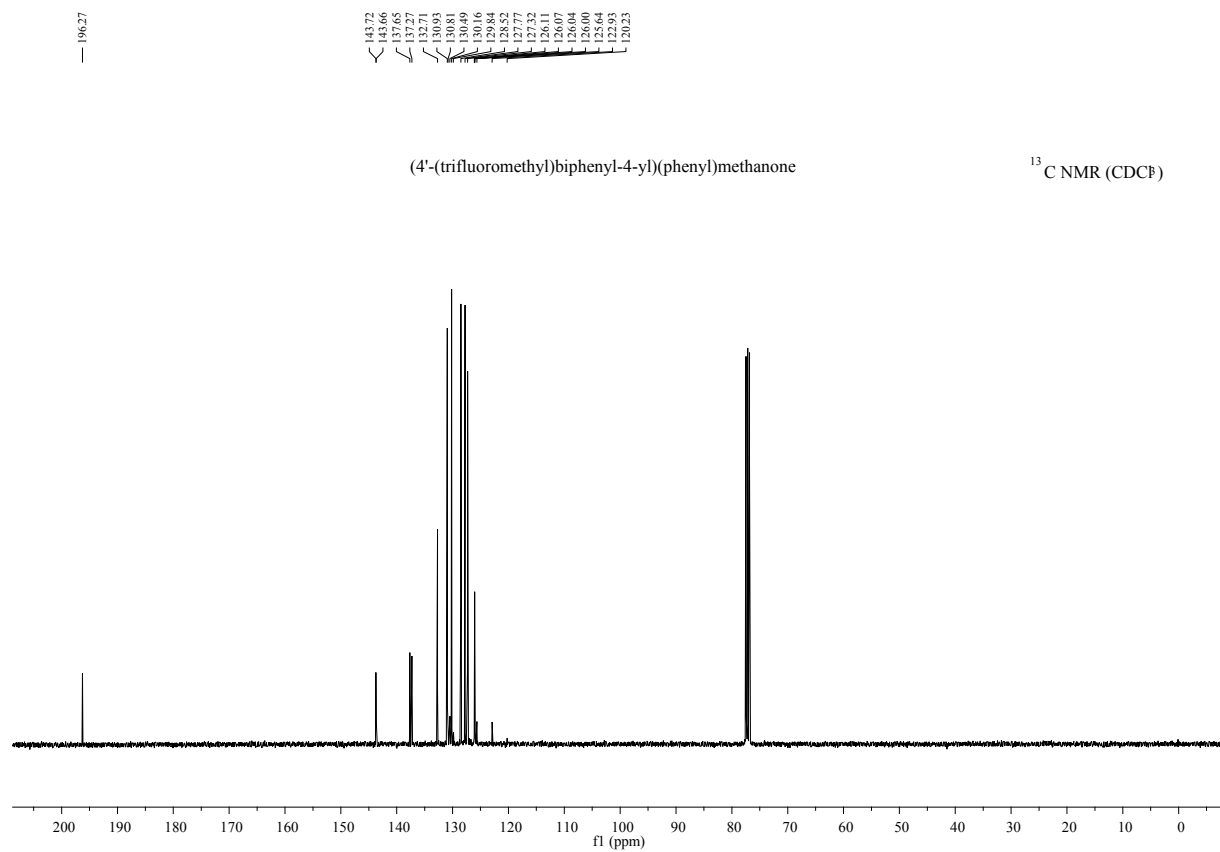

# 44. Ethyl 4'-(trifluoromethyl)biphenyl-4-carboxylate

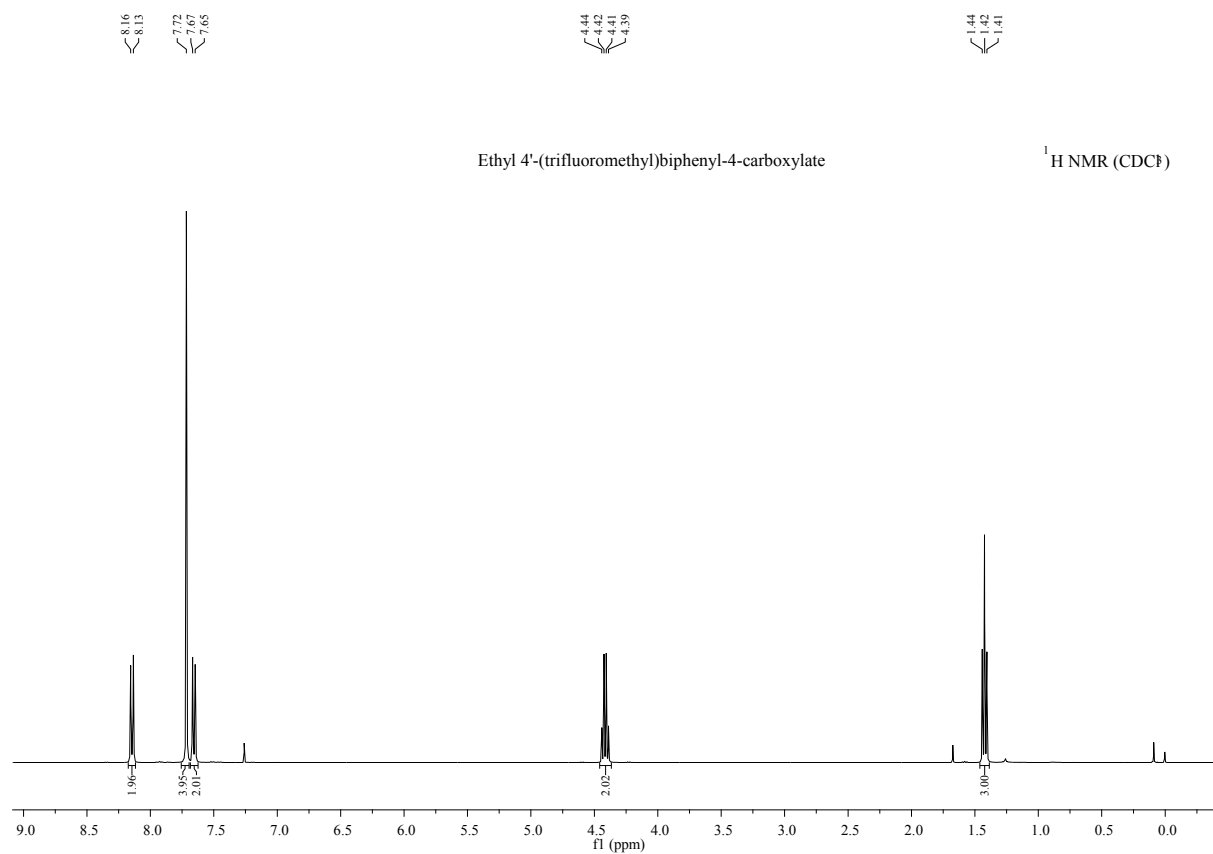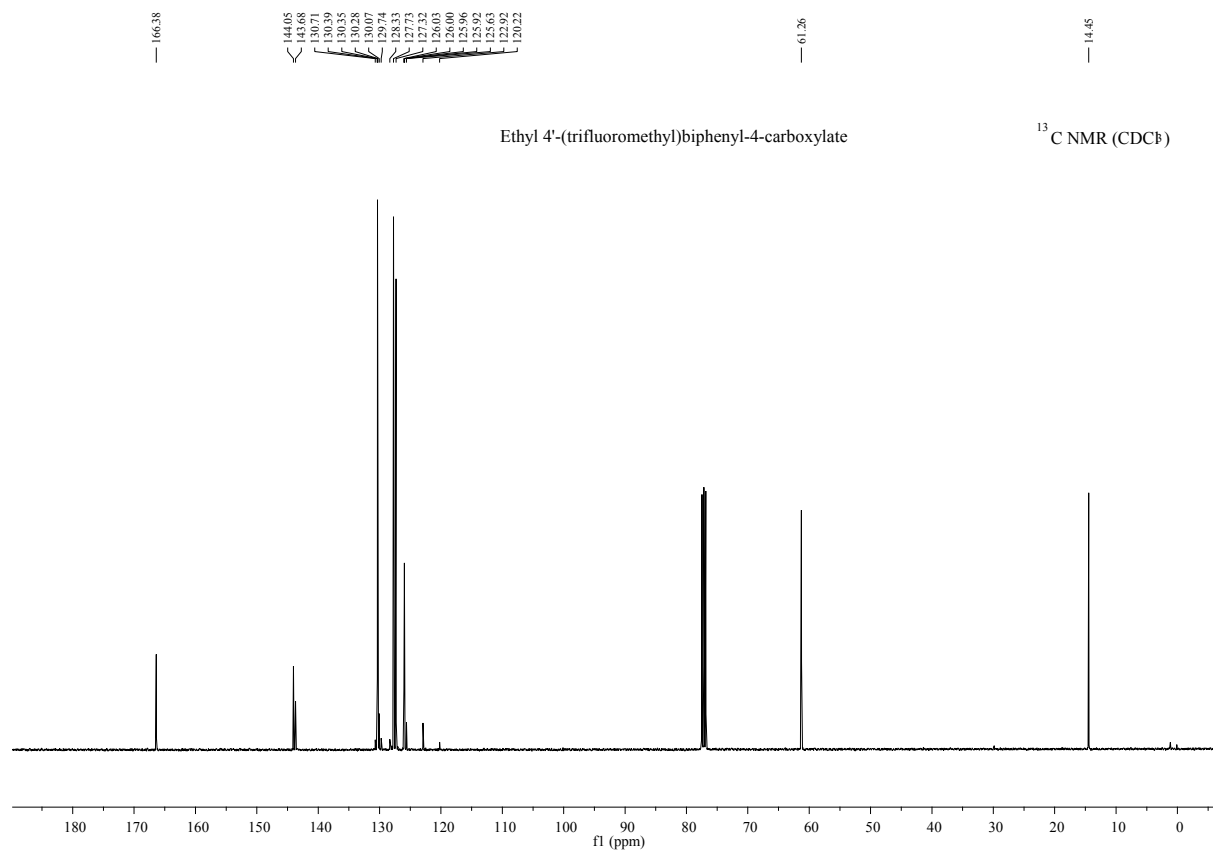



45. *N,N*-Diethyl-4'-(trifluoromethyl)biphenyl-4-carboxamide

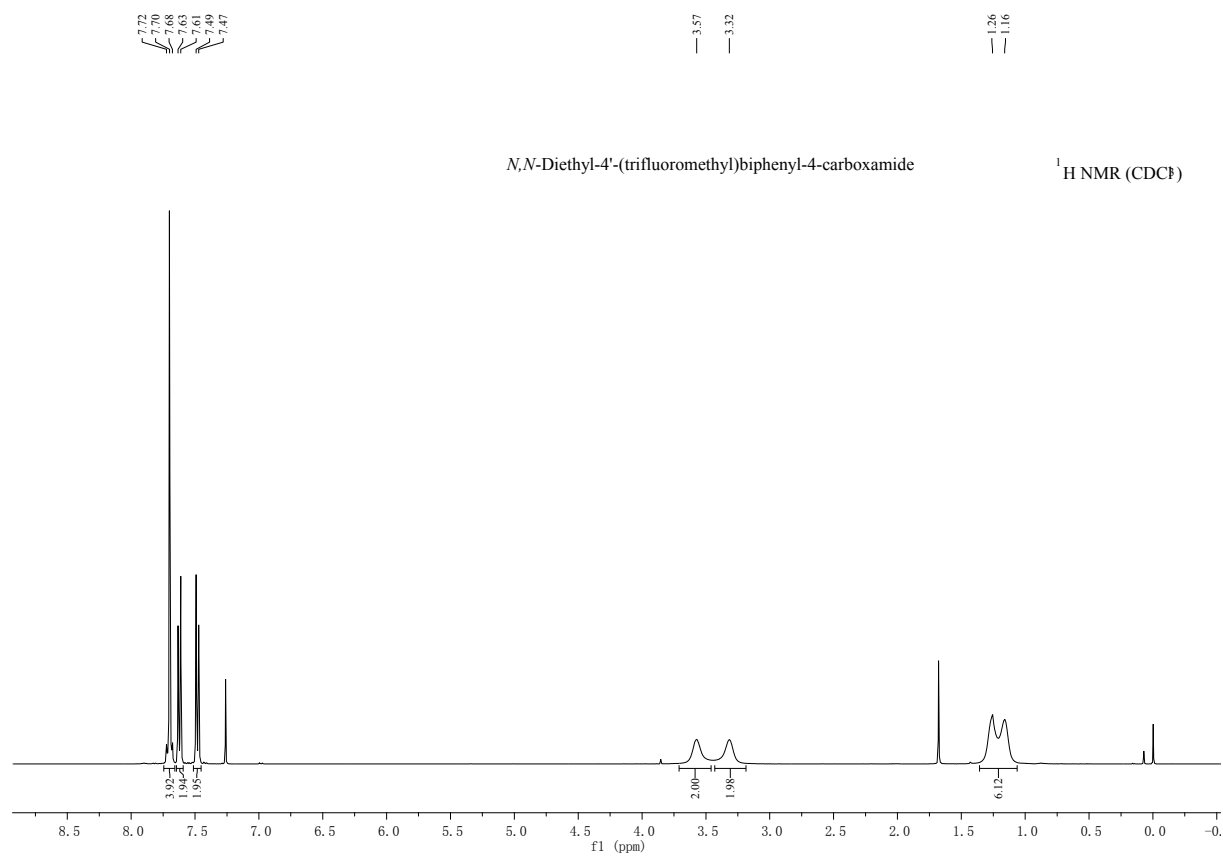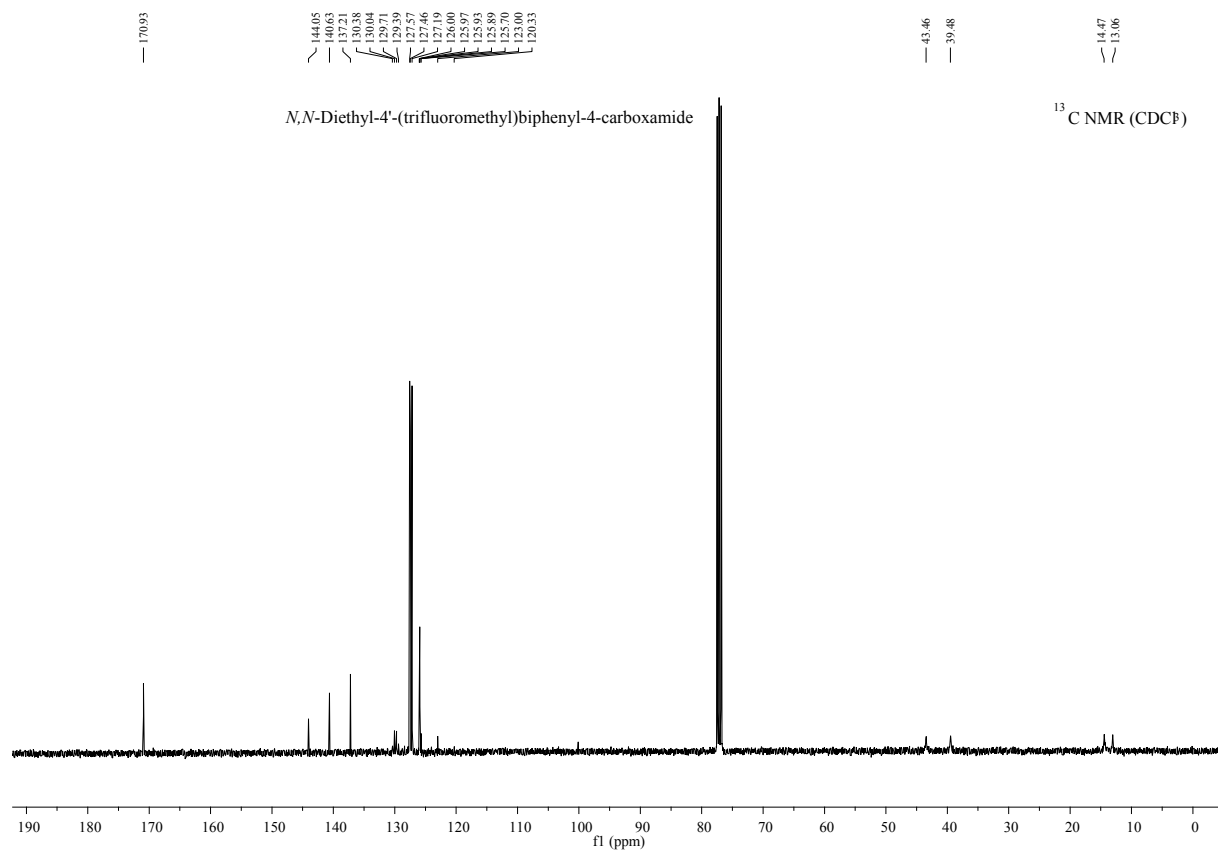

# 46. (4'-(trifluoromethyl)biphenyl-2-yl)(phenyl)methanone

7.68  
7.68  
7.66  
7.66  
7.66  
7.62  
7.61  
7.61  
7.61  
7.59  
7.59  
7.55  
7.55  
7.54  
7.54  
7.52  
7.52  
7.51  
7.50  
7.48  
7.48  
7.45  
7.45  
7.44  
7.44  
7.39  
7.37  
7.34  
7.34  
7.30

(4'-(trifluoromethyl)biphenyl-2-yl)(phenyl)methanone

<sup>1</sup>H NMR (CDCl<sub>3</sub>)

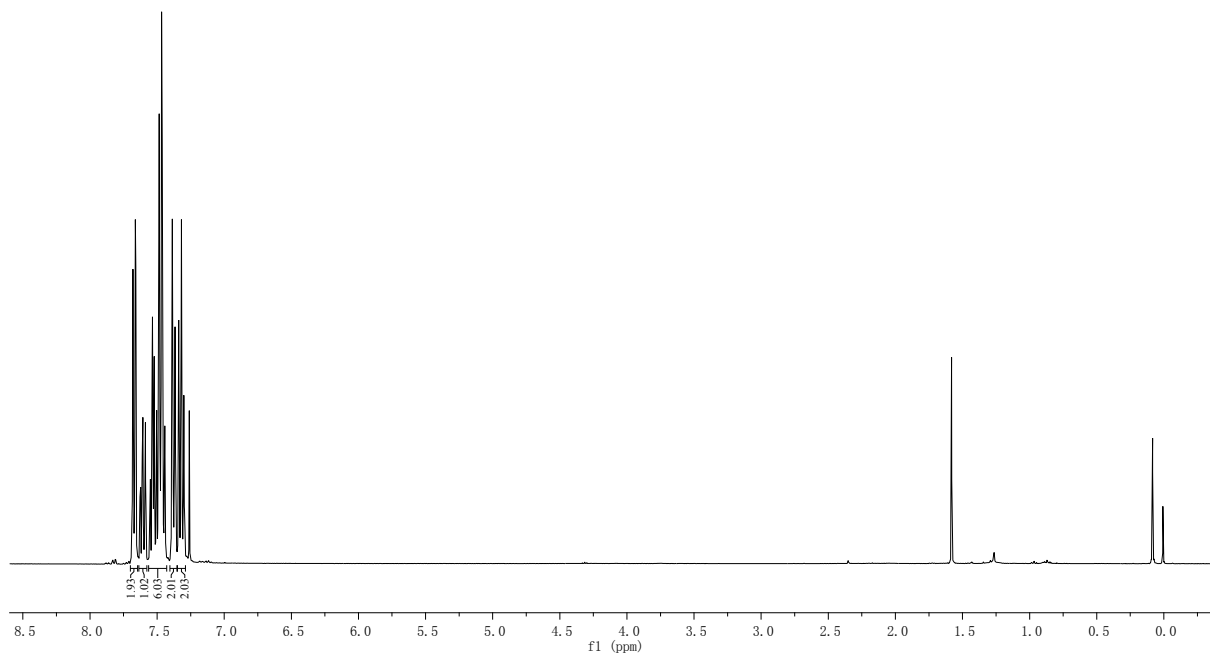

198.25

144.02  
140.03  
139.08  
137.41  
133.31  
133.31  
130.71  
130.67  
130.07  
129.69  
129.41  
129.36  
129.14  
128.43  
128.43  
127.66  
127.66  
125.54  
125.58  
125.58  
125.34  
125.30  
125.27  
125.27  
120.13

(4'-(trifluoromethyl)biphenyl-2-yl)(phenyl)methanone

<sup>13</sup>C NMR (CDCl<sub>3</sub>)

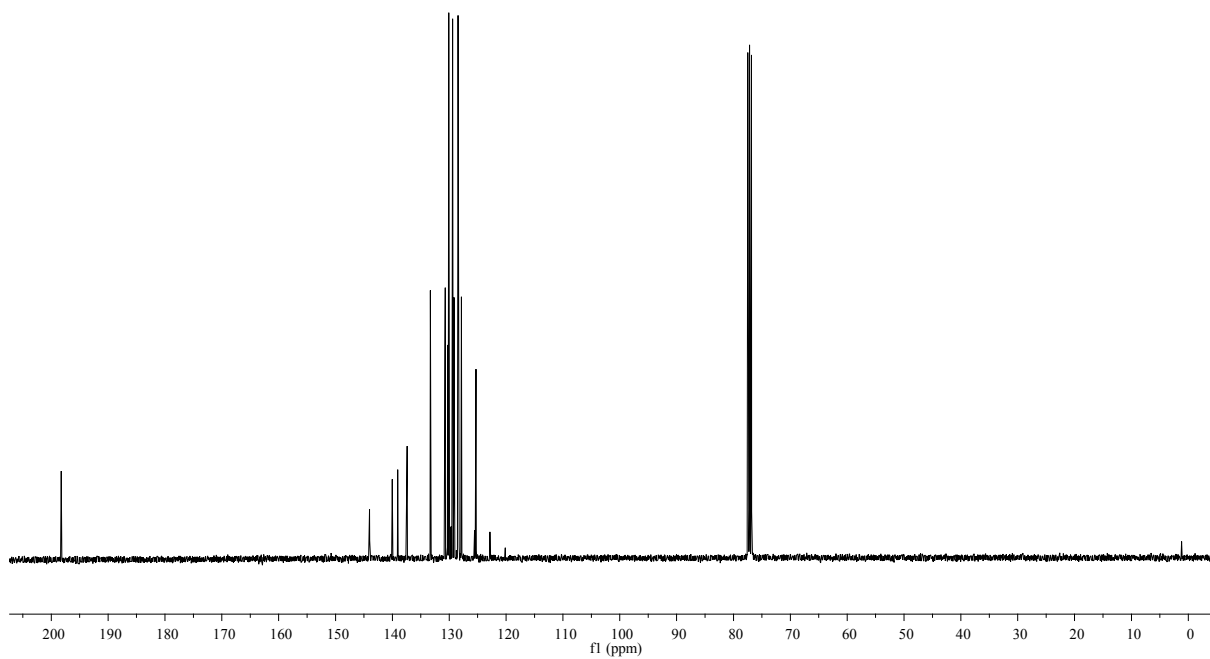

47. 2-(4-(trifluoromethyl)phenyl)furan

7.77  
7.75  
7.64  
7.52  
7.52  
6.77  
6.77  
6.69  
6.52  
6.51

2-(4-(trifluoromethyl)phenyl)furan

<sup>1</sup>H NMR (CDCl<sub>3</sub>)

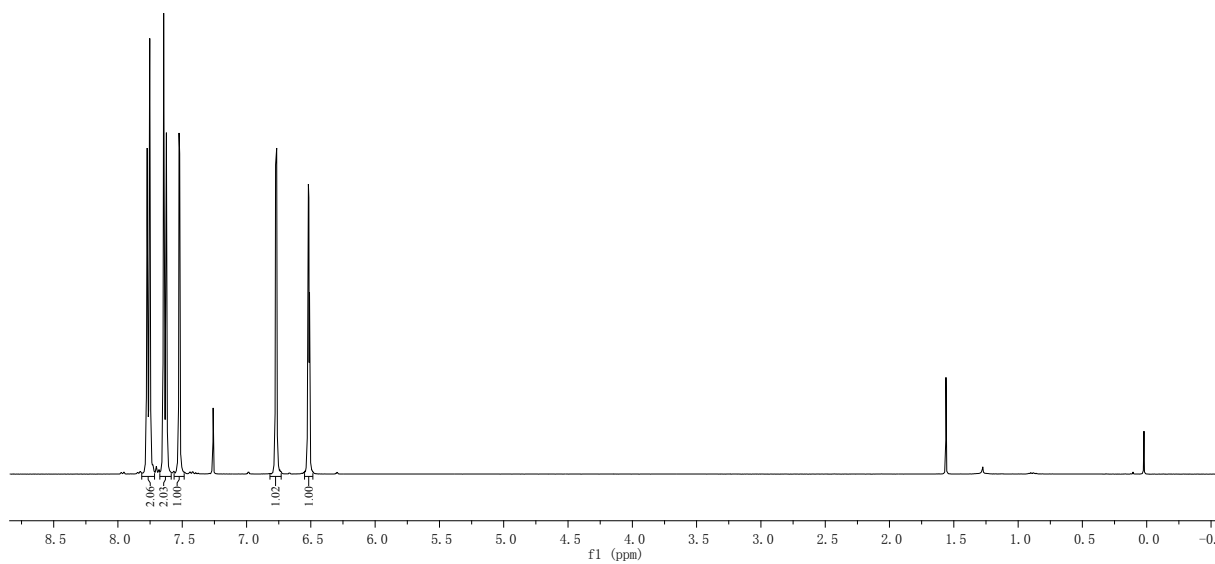

152.63  
143.22  
134.06  
129.21  
128.89  
128.38  
128.89  
128.85  
128.81  
128.86  
128.88  
122.97  
122.70  
107.10

2-(4-(trifluoromethyl)phenyl)furan

<sup>13</sup>C NMR (CDCl<sub>3</sub>)

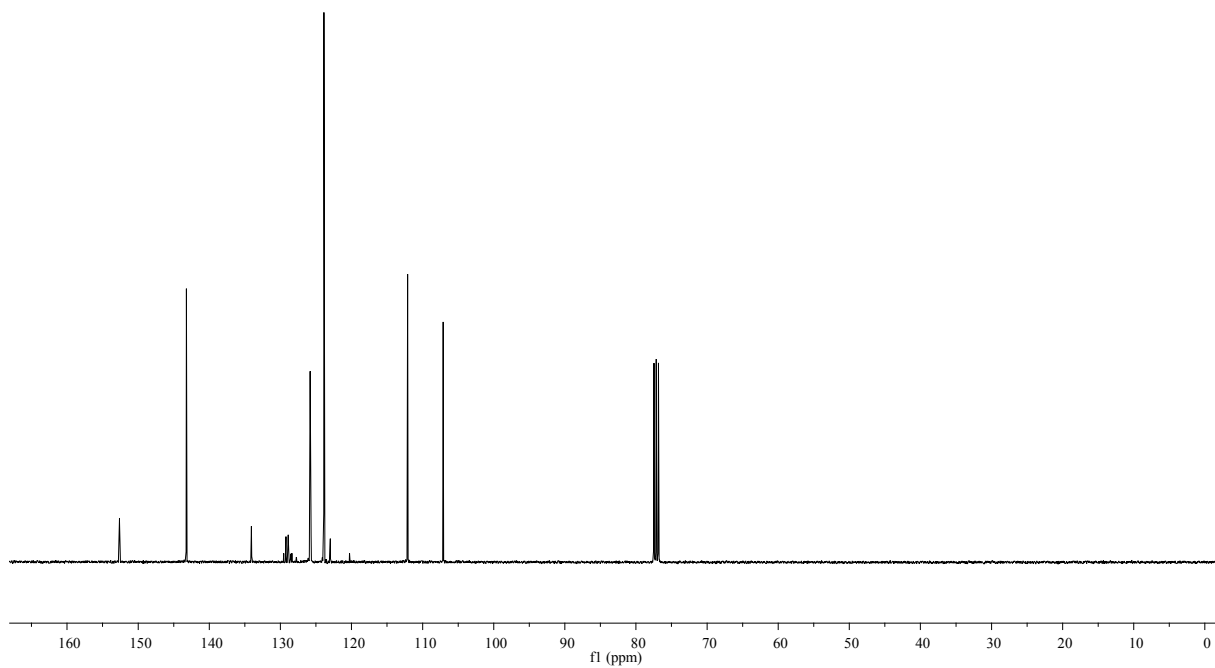

48. (4-(Furan-2-yl)phenyl)(phenyl)methanone

7.87  
7.84  
7.82  
7.80  
7.78  
7.76  
7.62  
7.60  
7.58  
7.54  
7.52  
7.50  
7.48  
7.26  
6.82  
6.82  
6.54  
6.53  
6.52

(4-(Furan-2-yl)phenyl)(phenyl)methanone

<sup>1</sup>H NMR (CDCl<sub>3</sub>)

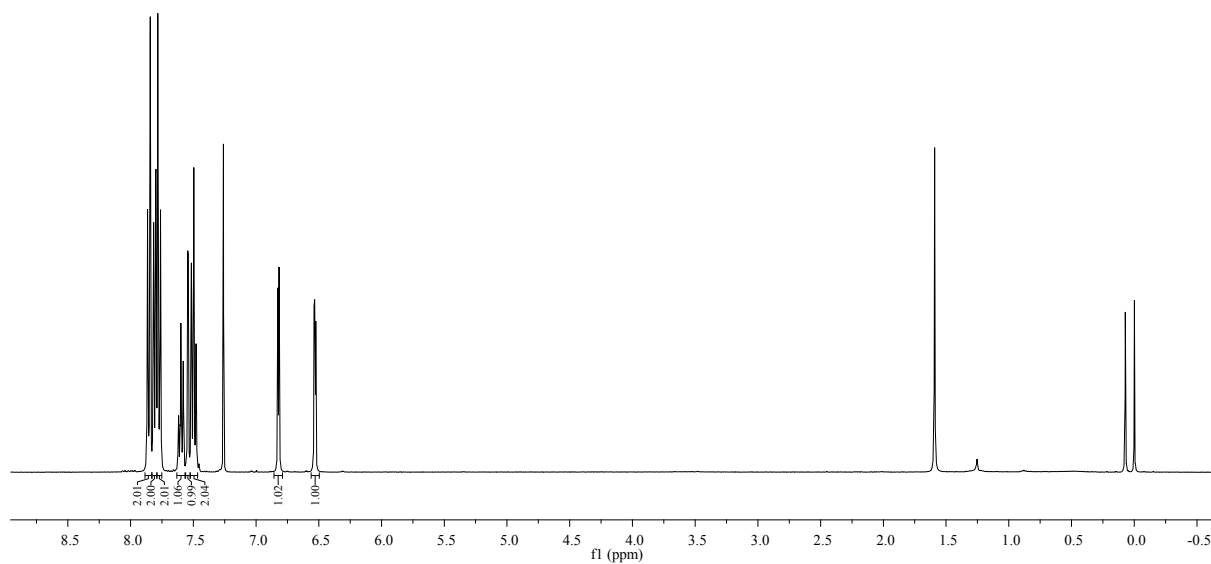

196.18  
153.02  
143.39  
137.91  
136.01  
134.36  
132.66  
130.07  
128.44  
123.46  
112.23  
107.51

(4-(Furan-2-yl)phenyl)(phenyl)methanone

<sup>13</sup>C NMR (CDCl<sub>3</sub>)

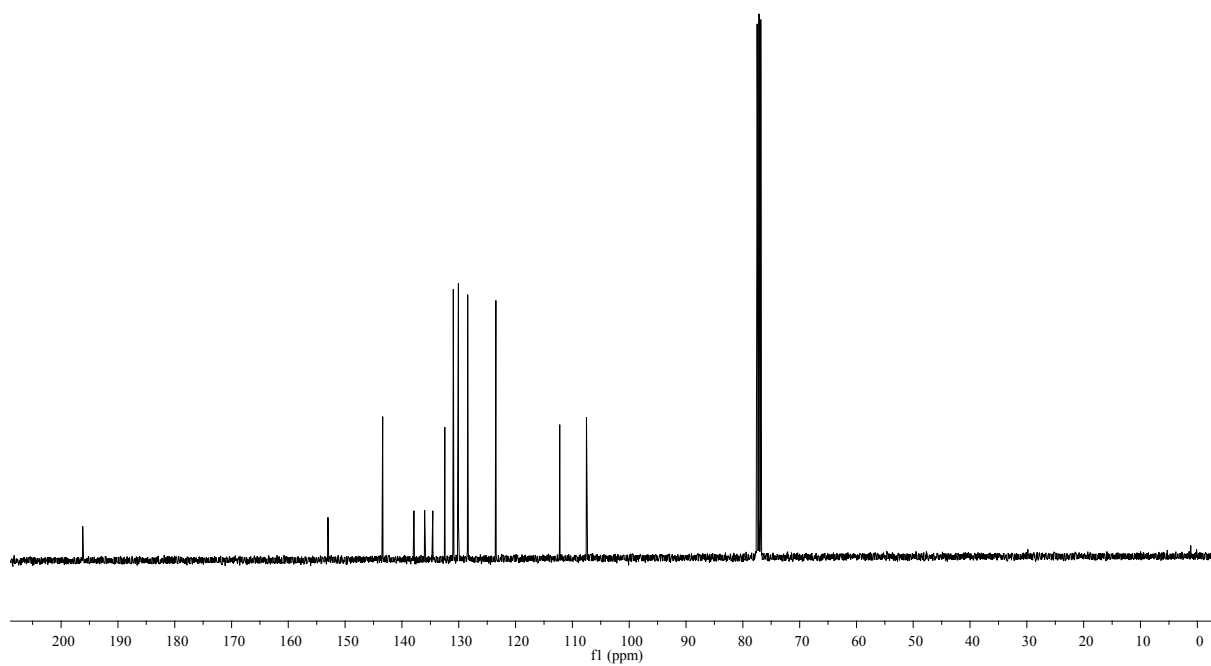

# 49. Ethyl 4-(furan-2-yl)benzoate

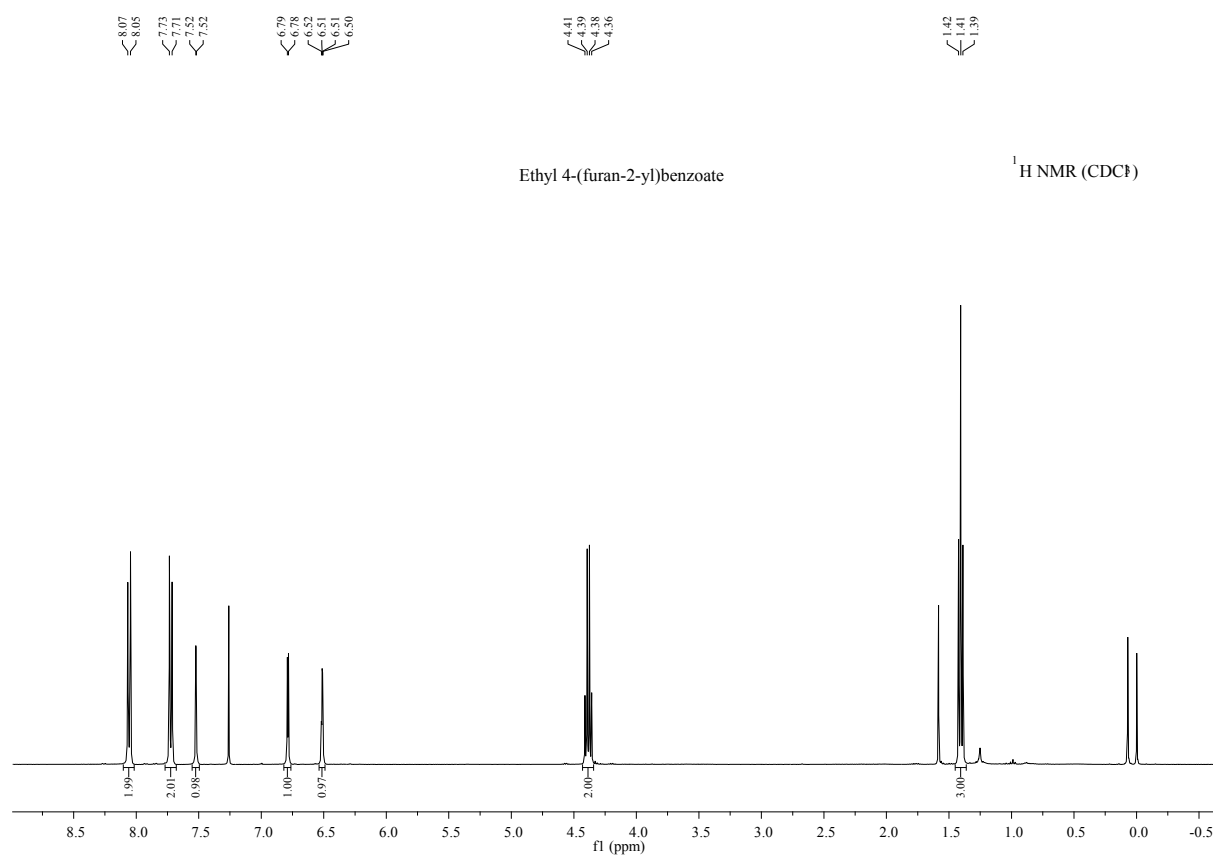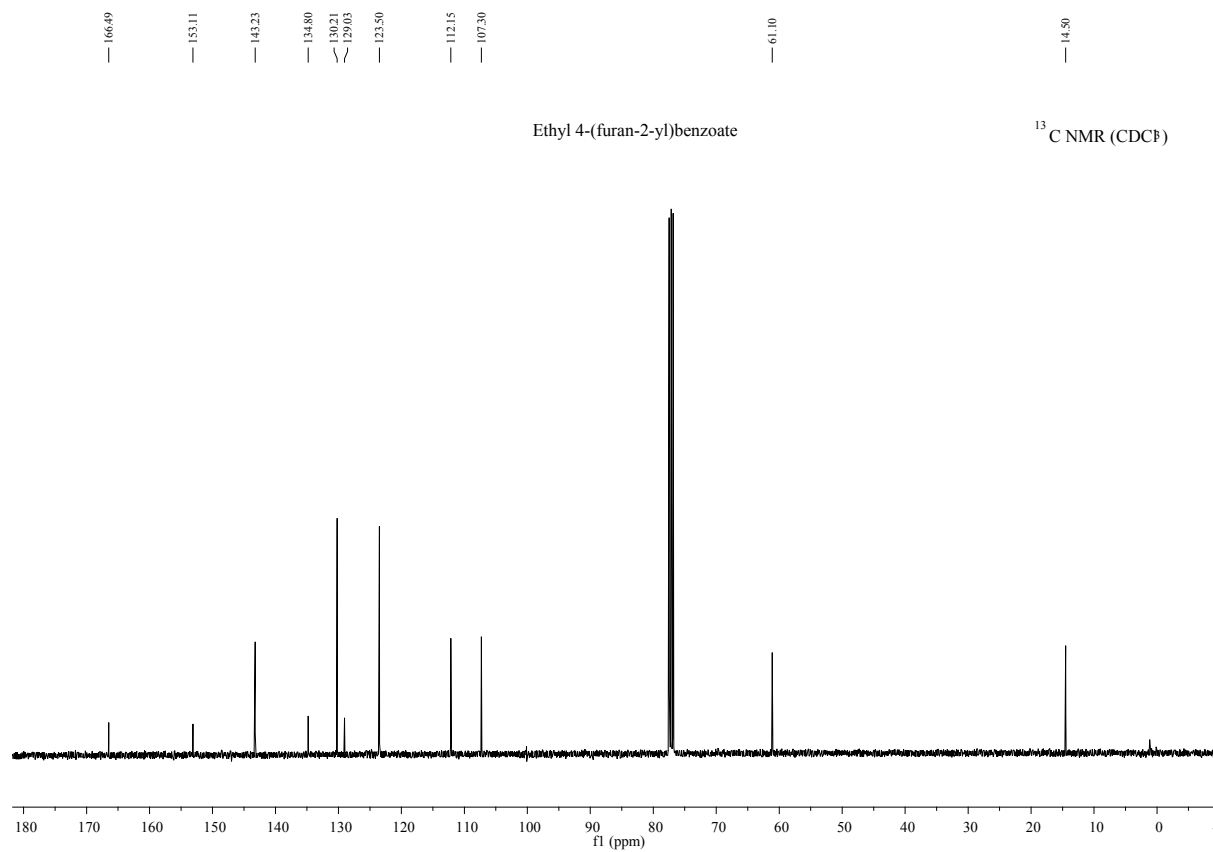

50. N,N-Diethyl-4-(furan-2-yl)carboxamide

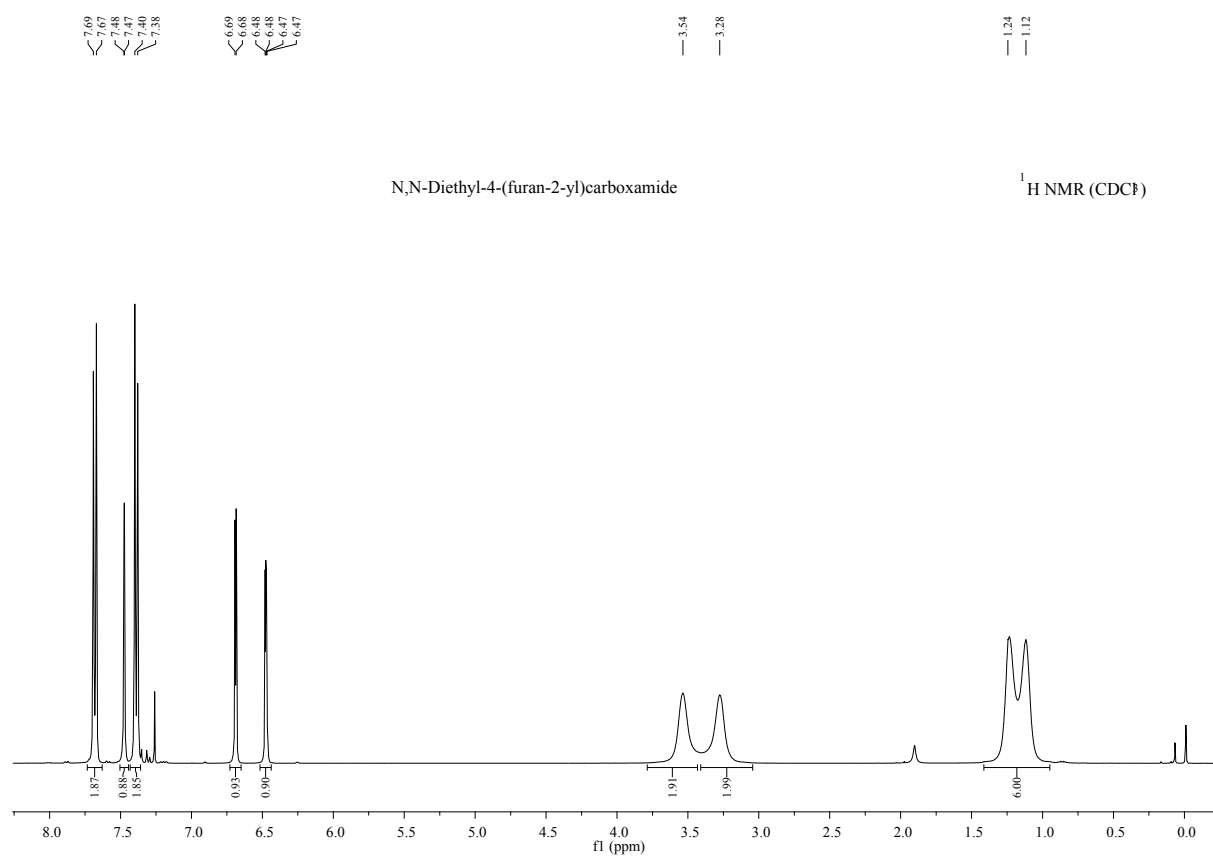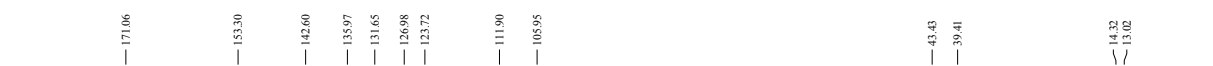

N,N-Diethyl-4-(furan-2-yl)carboxamide

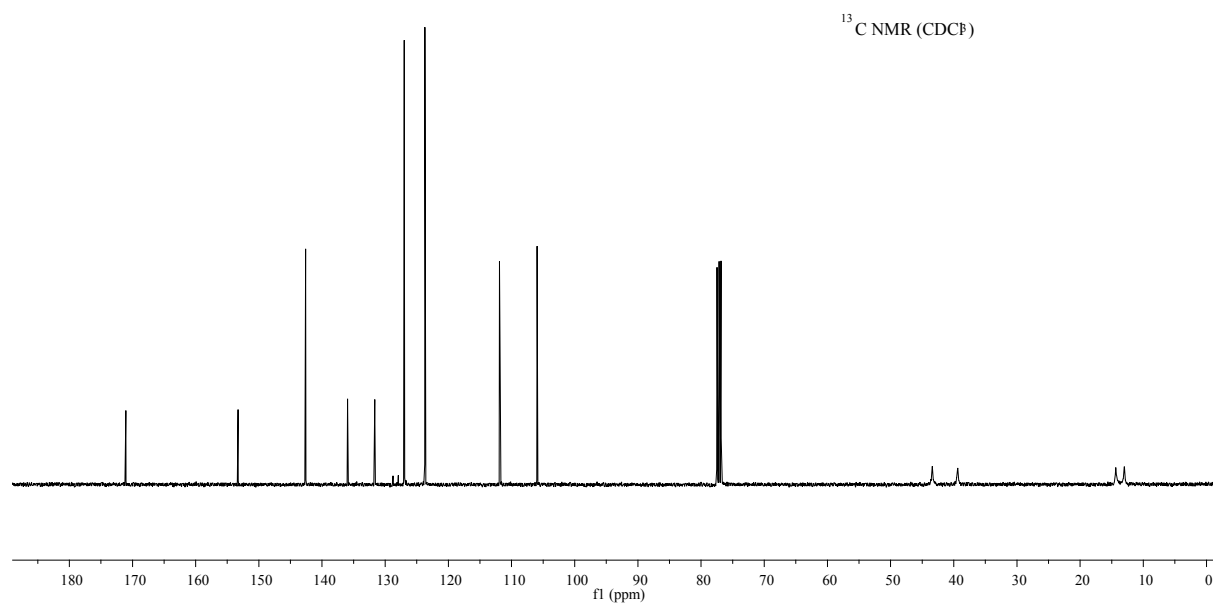

# 51. 2-Furan-2-yl-benzonitrile

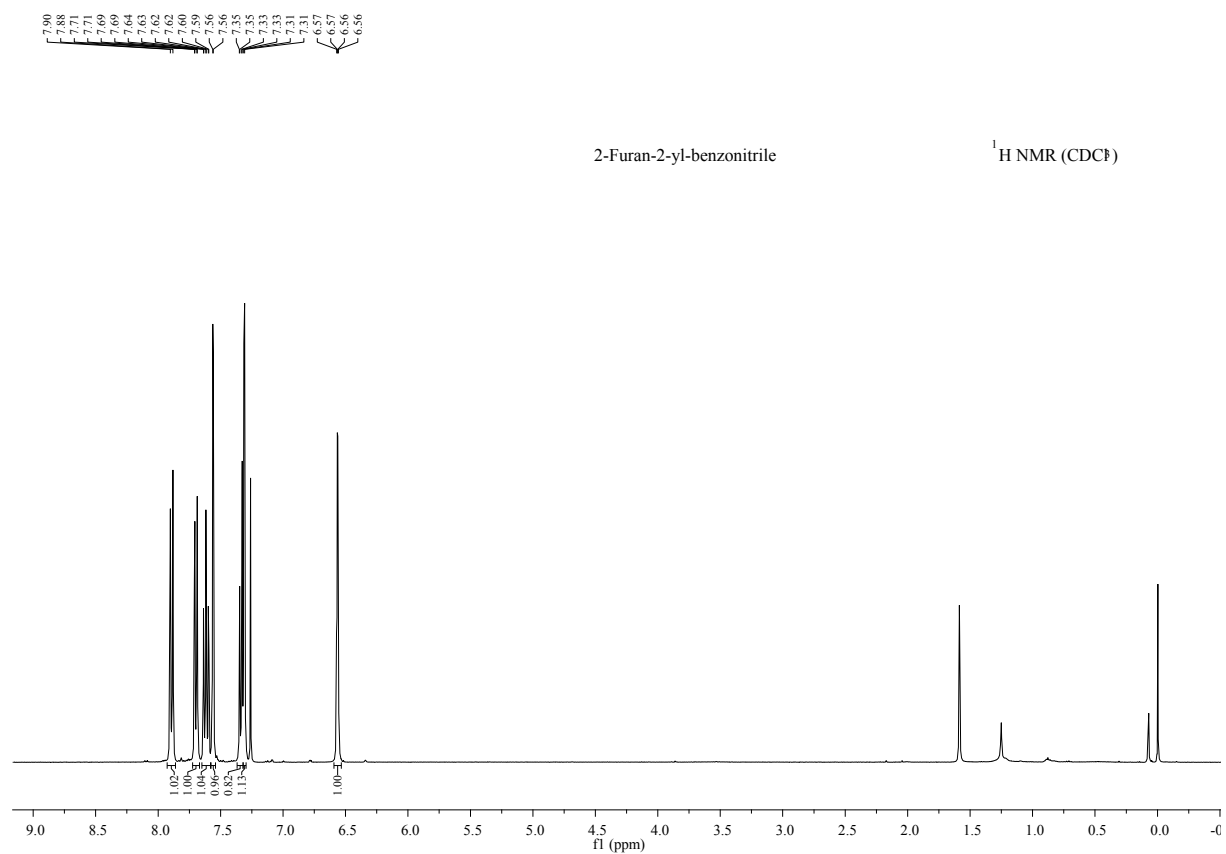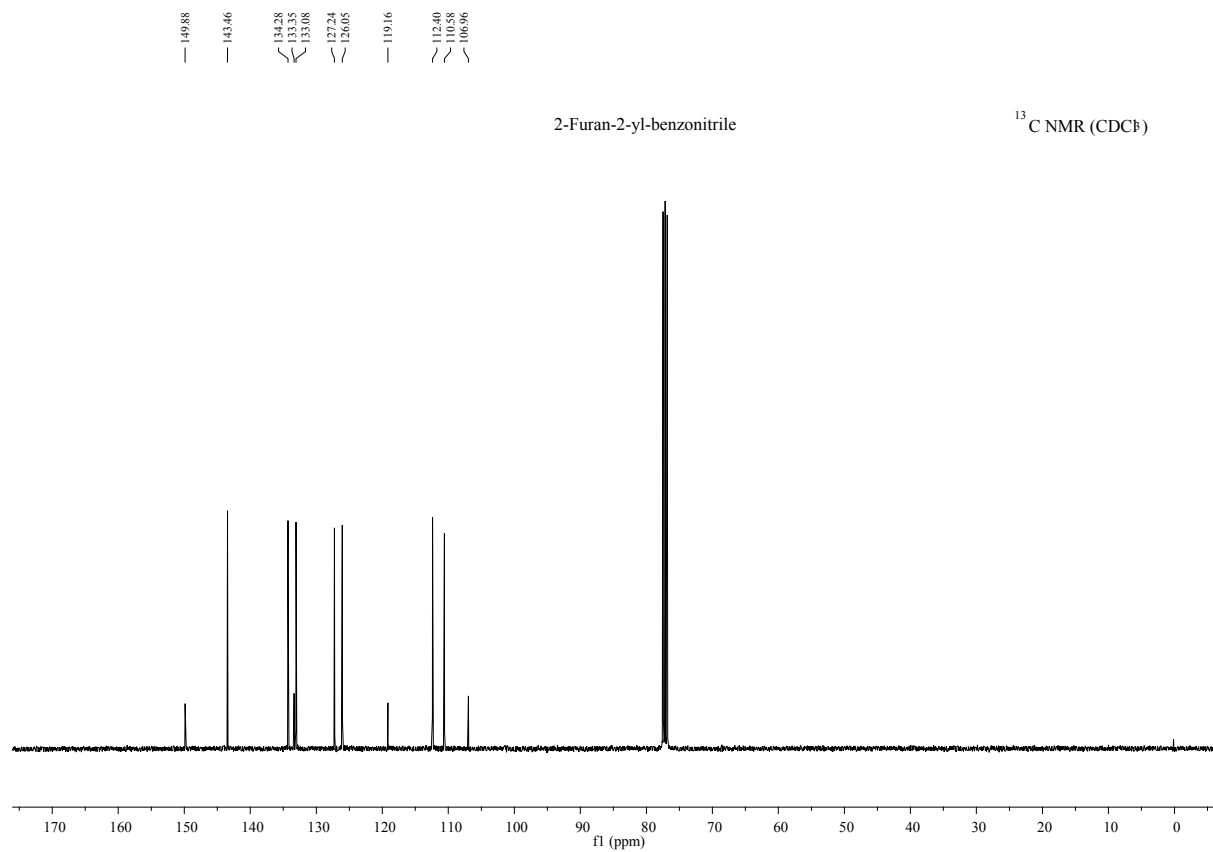

Supplement: c4ob01041h1.pdf [file c4ob01041h1.pdf]
